# Supplementary material
Source: publisher figshare collection journal article supplement (https://acs.figshare.com/ndownloader/files/8025020)
Supplement: Supplementary file 1 [file 8025020]

## Sheet: Description
Supplemental Table 2. Data summary for S-sulfenylated peptides and proteins identified in RKO cells using DYn-2 probe. The spectral information for all the identified peptides, such as precursor mass, mass accuracy, and scan number corresponding to each RAW file, is included.

## Sheet: Analysis View
Name	Software	Value
TagRecon 1.4.47	TagRecon 1.4.47
MS-GF+ Beta (v9517)	MS-GF+ Beta (v9517)

## Sheet: Modification View
Delta Mass	Total	C	M
Total	4760	2570	2190
333.1689 ; (0 Unimod matches)	521	521
57.0215 ; Carbamidomethyl ; Ala->Gln ; Gly->Asn ; Gly	1294	1294
57.0214 ; Carbamidomethyl ; Ala->Gln ; Gly->Asn ; Gly	755	755
15.9949 ; Oxidation ; Ala->Ser ; Phe->Tyr	2190		2190

## Sheet: Spectrum View
Group/Source/Spectrum	Distinct Peptides	Distinct Matches	Filtered Spectra	Distinct Analyses	Distinct Charges	Protein Groups	Scan Time	Precursor m/z	Observed Mass	Exact Mass	Mass Error	Analysis	Charge	Q Value	Sequence
	216	299	521	2	4	238
20150427	216	299	521	2	4	238
JY_DYn2_vitro_Sulfenylome_20150416_BR2	183	246	291	2	4	206
0.1.8420							0	403.547	1207.62	1207.61	0.00506939	TagRecon 1.4.47	3	0.0041412	RC[333]TKPDR
0.1.9202							0	407.879	1220.61	1220.63	-0.0194059	TagRecon 1.4.47	3	0.0188425	QGVC[333]VNIR
0.1.9449							0	598.821	1195.63	1195.63	-8.93224e-05	TagRecon 1.4.47	2	0.00193105	IKC[333]DKEK
0.1.10219							0	517.6	1549.78	1549.77	0.011895	TagRecon 1.4.47	3	0.00201992	KC[333]NTDQAGRPK
0.1.10315							0	585.294	1168.57	1168.57	0.00797656	TagRecon 1.4.47	2	0.0171361	KNASC[333]GTR
0.1.13022							0	499.272	1494.79	1494.78	0.0189739	TagRecon 1.4.47	3	0.0121196	KC[333]STPEEIKK
0.1.13332							0	684.346	1366.68	1366.67	0.0103367	TagRecon 1.4.47	2	0.0155081	EALNSC[333]NKR
0.1.13811							0	600.286	1198.56	1198.55	0.0109217	TagRecon 1.4.47	2	0.00938996	ANAAAM[16]C[333]AK
0.1.14261							0	749.362	1496.71	1496.7	0.00606923	TagRecon 1.4.47	2	0.00967172	TGSQGQC[333]TQVR
0.1.14392							0	476.243	1425.71	1425.69	0.0141269	TagRecon 1.4.47	3	0.00671349	KC[333]GIQDTNSK
0.1.14503							0	469.235	936.456	936.449	0.00723712	TagRecon 1.4.47	2	0.019658	TGAPC[333]R
0.1.14518							0	689.336	2064.99	2064.97	0.0178981	TagRecon 1.4.47	3	0.00101408	ATC[333]APQHGAPGPGPADASK
0.1.14588							0	713.86	1425.71	1425.69	0.0128096	TagRecon 1.4.47	2	0.00129148	KC[333]GIQDTNSK
0.1.14597							0	476.241	1425.7	1425.69	0.00809423	TagRecon 1.4.47	3	0.0093228	KC[333]GIQDTNSK
0.1.14619							0	529.591	1585.75	1585.74	0.0140414	TagRecon 1.4.47	3	0.0187408	KC[333]YEM[16]ASHLR
0.1.14624							0	1033.49	2064.98	2064.97	0.0062765	TagRecon 1.4.47	2	0.000965045	ATC[333]APQHGAPGPGPADASK
0.1.14663							0	689.333	2064.98	2064.97	0.00834479	TagRecon 1.4.47	3	0.000974555	ATC[333]APQHGAPGPGPADASK
0.1.14885							0	529.591	1585.75	1585.74	0.012161	TagRecon 1.4.47	3	0.0183671	KC[333]YEM[16]ASHLR
0.1.14941							0	601.298	1800.87	1800.86	0.0149402	TagRecon 1.4.47	3	0.00892511	ELC[333]HTQSSHASLR
0.1.15128							0	685.001	2051.98	2051.97	0.00755612	TagRecon 1.4.47	3	0.00285788	IHEGC[333]EEPATHNALAK
0.1.15494							0	479.265	1434.77	1434.77	0.00800958	TagRecon 1.4.47	3	0.00190052	TVAKC[333]QVTPR
0.1.15577							0	453.898	1358.67	1358.67	0.00733119	TagRecon 1.4.47	3	0.0185225	RC[333]QYVTEK
0.1.15601							0	718.396	1434.78	1434.77	0.0131202	TagRecon 1.4.47	2	0.00129642	TVAKC[333]QVTPR
0.1.15642							0	479.265	1434.77	1434.77	0.00835157	TagRecon 1.4.47	3	0.00373842	TVAKC[333]QVTPR
0.1.15669							0	680.343	1358.67	1358.67	0.00643029	TagRecon 1.4.47	2	0.00361285	RC[333]QYVTEK
0.1.16237							0	423.549	1267.62	1267.62	0.000813569	TagRecon 1.4.47	3	0.00853084	DRC[333]TLAEK
0.1.16369							0	689.661	2065.96	2065.95	0.00748015	TagRecon 1.4.47	3	0.00167514	HELQANC[333]YEEVKDR
0.1.16570							0	425.555	1273.64	1273.64	0.00469815	TagRecon 1.4.47	3	0.00292379	ATYDKLC[333]K
0.1.16605							0	768.373	1534.73	1534.73	0.00420658	TagRecon 1.4.47	2	0.00357563	HC[333]NM[16]VLENVK
0.1.16629							0	512.586	1534.74	1534.73	0.00926767	TagRecon 1.4.47	3	0.00446333	HC[333]NM[16]VLENVK
0.1.16685							0	425.556	1273.65	1273.64	0.00833837	TagRecon 1.4.47	3	0.00464722	ATYDKLC[333]K
0.1.16692							0	637.83	1273.64	1273.64	0.00709576	TagRecon 1.4.47	2	0.0113531	ATYDKLC[333]K
0.1.16736							0	768.375	1534.74	1534.73	0.00854465	TagRecon 1.4.47	2	0.00122644	HC[333]NM[16]VLENVK
0.1.16760							0	512.586	1534.74	1534.73	0.00845889	TagRecon 1.4.47	3	0.00188567	HC[333]NM[16]VLENVK
0.1.16853							0	662.357	1322.7	1322.69	0.00805952	TagRecon 1.4.47	2	0.00134533	KC[333]LEELQK
0.1.16889							0	710.399	1418.78	1418.77	0.0125917	TagRecon 1.4.47	2	0.0192271	LNKC[333]GVISPR
0.1.16924							0	962.461	1922.91	1922.89	0.0135379	TagRecon 1.4.47	2	0.000768113	FNAHGDANTIVC[333]NSK
0.1.16962							0	906.105	2715.29	2715.27	0.0193472	TagRecon 1.4.47	3	0.00089249	EAQNLQC[333]AASTAQESC[57]PPKPPR
0.1.17068							0	585.622	1753.84	1753.83	0.0136909	TagRecon 1.4.47	3	0.0050994	SIKDTIC[333]NQDER
0.1.17081							0	877.93	1753.85	1753.83	0.0146058	TagRecon 1.4.47	2	0.00109955	SIKDTIC[333]NQDER
0.1.17083							0	515.563	1543.67	1543.65	0.0130393	TagRecon 1.4.47	3	0.00897753	SC[333]YDLSC[57]HAR
0.1.17247							0	585.622	1753.84	1753.83	0.0136181	TagRecon 1.4.47	3	0.0191679	SIKDTIC[333]NQDER
0.1.17259							0	877.929	1753.84	1753.83	0.0120914	TagRecon 1.4.47	2	0.0010895	SIKDTIC[333]NQDER
0.1.17401							0	693.085	2768.31	2768.29	0.0211687	TagRecon 1.4.47	4	0.00464656	HELQANC[57]YEEVKDRC[333]TLAEK
0.1.17432							0	554.671	2768.32	2768.29	0.02861	TagRecon 1.4.47	5	0	HELQANC[57]YEEVKDRC[333]TLAEK
0.1.17502							0	923.776	2768.31	2768.29	0.0175376	TagRecon 1.4.47	3	5.75127e-05	HELQANC[57]YEEVKDRC[333]TLAEK
0.1.17551							0	693.084	2768.31	2768.29	0.0191276	TagRecon 1.4.47	4	0.00279272	HELQANC[57]YEEVKDRC[333]TLAEK
0.1.17621							0	459.597	1375.77	1375.76	0.00432164	TagRecon 1.4.47	3	0.00186213	QVLIRPC[333]SK
0.1.17627							0	730.826	1459.64	1459.63	0.00370084	TagRecon 1.4.47	2	0.00133681	SGQGAFGNMC[333]R
0.1.18007							0	459.588	1375.74	1375.73	0.0135485	TagRecon 1.4.47	3	0.0172772	KAQC[333]PIVER
0.1.18019							0	836.909	1671.8	1671.79	0.0101843	TagRecon 1.4.47	2	0.00116794	YLAEVAC[333]GDDRK
0.1.18105							0	645.556	2578.2	2578.18	0.0160255	TagRecon 1.4.47	4	0.00946121	QM[16]EKDETVSDC[333]SPHIANIGR
0.1.18131							0	860.403	2578.19	2578.18	0.00862408	TagRecon 1.4.47	3	0.00145241	QM[16]EKDETVSDC[333]SPHIANIGR
0.1.18187							0	674.342	2020	2019.99	0.0114409	TagRecon 1.4.47	3	0.00123334	KPNVGC[333]QQDSEELLK
0.1.18199							0	1011.01	2020	2019.99	0.00862055	TagRecon 1.4.47	2	0.00118296	KPNVGC[333]QQDSEELLK
0.1.18300							0	707.366	1412.72	1412.71	0.00581204	TagRecon 1.4.47	2	0.00121675	IAVAAQNC[333]YK
0.1.18317							0	487.554	1459.64	1459.63	0.00779729	TagRecon 1.4.47	3	0.00190031	SGQGAFGNMC[333]R
0.1.18398							0	498.621	1492.84	1492.83	0.00744272	TagRecon 1.4.47	3	0.00567335	LLIEKC[333]NTVK
0.1.18401							0	1005.51	2009	2008.99	0.00815279	TagRecon 1.4.47	2	0.00115869	NYLEPGKEC[333]VQPATK
0.1.18648							0	605.814	1209.61	1209.61	0.00793762	TagRecon 1.4.47	2	0.00948833	GC[333]EVVVSGK
0.1.18701							0	704.87	1407.73	1407.72	0.00775555	TagRecon 1.4.47	2	0.00120861	ALANSLAC[333]QGK
0.1.18703							0	531.61	1591.81	1591.79	0.0154278	TagRecon 1.4.47	3	0.00767281	ALRPGDPGFC[333]AR
0.1.18776							0	613.981	1838.92	1838.9	0.0214643	TagRecon 1.4.47	3	0.00185987	YSNSALGHVNC[333]TIK
0.1.18833							0	920.463	1838.91	1838.9	0.0134593	TagRecon 1.4.47	2	0.00103326	YSNSALGHVNC[333]TIK
0.1.18839							0	517.608	1549.8	1549.79	0.00871964	TagRecon 1.4.47	3	0.00176732	GLDVNKC[333]EIAR
0.1.18909							0	613.979	1838.92	1838.9	0.0169791	TagRecon 1.4.47	3	0.00166984	YSNSALGHVNC[333]TIK
0.1.18912							0	700.367	2098.08	2098.06	0.0164607	TagRecon 1.4.47	3	0.00122934	EIVHLQAGQC[333]GNQIGAK
0.1.18936							0	1050.05	2098.08	2098.06	0.0151187	TagRecon 1.4.47	2	0.00082097	EIVHLQAGQC[333]GNQIGAK
0.1.18954							0	603.651	1807.93	1807.91	0.0182831	TagRecon 1.4.47	3	0.00296728	KVEELQAC[333]VETAR
0.1.19042							0	700.369	2098.09	2098.06	0.0223626	TagRecon 1.4.47	3	0.00111967	EIVHLQAGQC[333]GNQIGAK
0.1.19132							0	681.343	2041.01	2040.99	0.0203114	TagRecon 1.4.47	3	0.00175445	LM[16]DQNLKC[333]LSAAEEK
0.1.19305							0	762.88	1523.75	1523.74	0.00502786	TagRecon 1.4.47	2	0.00595082	VIGSGC[333]NLDSAR
0.1.19382							0	681.34	2041	2040.99	0.0128217	TagRecon 1.4.47	3	0.00188606	LM[16]DQNLKC[333]LSAAEEK
0.1.19389							0	787.909	1573.8	1573.79	0.0109446	TagRecon 1.4.47	2	0.00125412	AAAPAPVSEAVC[333]R
0.1.19410							0	1021.5	2041	2040.99	0.00938987	TagRecon 1.4.47	2	0.00117614	LM[16]DQNLKC[333]LSAAEEK
0.1.19440							0	507.254	1518.74	1518.73	0.00785652	TagRecon 1.4.47	3	0.0186506	HC[333]NMVLENVK
0.1.19459							0	760.376	1518.74	1518.73	0.00529986	TagRecon 1.4.47	2	0.0010859	HC[333]NMVLENVK
0.1.19729							0	801.918	1601.82	1601.81	0.00823949	TagRecon 1.4.47	2	0.00123856	IIYGGSVTGATC[333]K
0.1.19944							0	502.919	1505.74	1505.73	0.0019411	TagRecon 1.4.47	3	0.00497232	AHVVPC[333]FDASK
0.1.20066							0	754.392	1506.77	1506.76	0.00909798	TagRecon 1.4.47	2	0.00120712	NNTQVLINC[333]R
0.1.20070							0	503.263	1506.77	1506.76	0.00547765	TagRecon 1.4.47	3	0.00906054	NNTQVLINC[333]R
0.1.20176							0	505.93	1514.77	1514.76	0.0129907	TagRecon 1.4.47	3	0.0020106	KETGAASFLC[333]R
0.1.20296							0	547.268	1638.78	1638.76	0.0172694	TagRecon 1.4.47	3	0.00425598	NM[16]SVHLSPC[333]FR
0.1.20309							0	755.627	3018.48	3018.45	0.0272316	TagRecon 1.4.47	4	0.00297514	TNHIGHTGYLNTVTVSPDGSLC[333]ASGGK
0.1.20324							0	670.969	2009.88	2009.87	0.0158867	TagRecon 1.4.47	3	0.00428884	C[57]C[57]LTYC[333]FNKPEDK
0.1.20441							0	672.345	1342.68	1342.66	0.0161699	TagRecon 1.4.47	2	0.0177634	SASVAPFTC[333]K
0.1.20445							0	805.43	1608.85	1608.83	0.0165438	TagRecon 1.4.47	2	0.00131742	TLIQNC[333]GASTIR
0.1.20583							0	554.983	1661.93	1661.91	0.0210791	TagRecon 1.4.47	3	0.00767842	VC[333]EEIAIIPSKK
0.1.20830							0	793.908	1585.8	1585.79	0.00884873	TagRecon 1.4.47	2	0.00131106	FIC[333]TTSAIQNR
0.1.21046							0	639.851	1277.69	1277.68	0.00709924	TagRecon 1.4.47	2	0.00917784	IAQLIC[333]ER
0.1.21064							0	509.614	1525.82	1525.81	0.012251	TagRecon 1.4.47	3	0.0163629	LLEC[333]PHLNVR
0.1.21923							0	704.032	2109.07	2109.06	0.0151353	TagRecon 1.4.47	3	0.0017988	IISNASC[333]TTNC[57]LAPLAK
0.1.21959							0	1055.54	2109.07	2109.06	0.00800711	TagRecon 1.4.47	2	0.00090477	IISNASC[333]TTNC[57]LAPLAK
0.1.22300							0	955.491	1908.97	1908.96	0.0067716	TagRecon 1.4.47	2	0.00108557	VNQIGSVTESLQAC[333]K
0.1.22308							0	637.332	1908.97	1908.96	0.0122706	TagRecon 1.4.47	3	0.00164217	VNQIGSVTESLQAC[333]K
0.1.22741							0	529.286	1584.84	1584.82	0.0146055	TagRecon 1.4.47	3	0.00380213	AVLFC[333]LSEDKK
0.1.23761							0	803.9	1605.79	1605.77	0.010797	TagRecon 1.4.47	2	0.00963952	DVIEEYFKC[333]K
0.1.23869							0	790.42	2368.24	2368.21	0.0277499	TagRecon 1.4.47	3	0.00830105	VQEKC[333]QLEINFNTLQTK
0.1.24052							0	1023.97	2045.93	2045.92	0.0115284	TagRecon 1.4.47	2	0.00128032	PM[16]C[333]VESFSDYPPLGR
0.1.24722							0	822.648	3286.56	3286.53	0.0283647	TagRecon 1.4.47	4	0.00903133	SGDAAIVDM[16]VPGKPMC[333]VESFSDYPPLGR
0.1.24746							0	761.372	3041.46	3041.43	0.0339395	TagRecon 1.4.47	4	0.00890309	AYHEQLSVAEITNAC[333]FEPANQM[16]VK
0.1.26405							0	731.877	2923.48	2923.45	0.0323972	TagRecon 1.4.47	4	0.0133902	AELAESKC[333]SELEEELKNVTNNLK
0.1.26834							0	731.875	2923.47	2923.45	0.0211751	TagRecon 1.4.47	4	0.00792085	AELAESKC[333]SELEEELKNVTNNLK
0.1.27602							0	981.035	1960.06	1960.05	0.0106192	TagRecon 1.4.47	2	0.00110217	AAVEEGIVLGGGC[333]ALLR
0.1.28006							0	857.215	3424.83	3424.8	0.0270515	TagRecon 1.4.47	4	0.00592259	KDGNASGTTLLEALDC[333]ILPPTRPTDKPLR
0.1.28032							0	685.973	3424.83	3424.8	0.0264008	TagRecon 1.4.47	5	0	KDGNASGTTLLEALDC[333]ILPPTRPTDKPLR
0.1.28067							0	916	1829.99	1829.97	0.0152785	TagRecon 1.4.47	2	0.000989449	SLHDALC[333]VLAQTVK
0.1.28070							0	611.005	1829.99	1829.97	0.0210636	TagRecon 1.4.47	3	0.00145894	SLHDALC[333]VLAQTVK
0.1.28968							0	765.656	3058.59	3058.56	0.0301029	TagRecon 1.4.47	4	0.00902163	KDGNASGTTLLEALDC[333]ILPPTRPTDK
0.1.29931							0	882.453	2644.34	2644.31	0.0247936	TagRecon 1.4.47	3	0.00199617	NVC[333]LPPEM[16]EVALTEDQVPALK
0.1.30160							0	825.192	3296.74	3296.71	0.0333962	TagRecon 1.4.47	4	0.00780707	DGNASGTTLLEALDC[333]ILPPTRPTDKPLR
0.1.30205							0	660.356	3296.75	3296.71	0.0377357	TagRecon 1.4.47	5	0	DGNASGTTLLEALDC[333]ILPPTRPTDKPLR
0.1.30219							0	719.695	2156.06	2156.04	0.0225705	TagRecon 1.4.47	3	0.0045764	AVC[333]M[16]LSNTTAIAEAWAR
0.1.30265							0	825.192	3296.74	3296.71	0.0308208	TagRecon 1.4.47	4	0.00528636	DGNASGTTLLEALDC[333]ILPPTRPTDKPLR
0.1.30287							0	1099.92	3296.73	3296.71	0.0264448	TagRecon 1.4.47	3	0.00143597	DGNASGTTLLEALDC[333]ILPPTRPTDKPLR
0.1.31519							0	848.467	2542.38	2542.36	0.017193	TagRecon 1.4.47	3	0.00157857	GLIAAIC[333]AGPTALLAHEIGFGSK
0.1.17502							0	923.776	2768.31	2768.29	0.017429	MS-GF+ Beta (v9517)	3	3.51953e-19	HELQANC[57]YEEVKDRC[333]TLAEK
0.1.16962							0	906.105	2715.29	2715.27	0.019317	MS-GF+ Beta (v9517)	3	2.4083e-16	EAQNLQC[333]AASTAQESC[57]PPKPPR
0.1.17551							0	693.084	2768.31	2768.29	0.0189416	MS-GF+ Beta (v9517)	4	6.66526e-16	HELQANC[57]YEEVKDRC[333]TLAEK
0.1.18131							0	860.403	2578.19	2578.18	0.00853527	MS-GF+ Beta (v9517)	3	7.46887e-16	QM[16]EKDETVSDC[333]SPHIANIGR
0.1.24690							0	1096.52	3286.55	3286.53	0.0146809	MS-GF+ Beta (v9517)	3	8.4293e-16	SGDAAIVDM[16]VPGKPMC[333]VESFSDYPPLGR
0.1.14624							0	1033.49	2064.97	2064.97	0.00618203	MS-GF+ Beta (v9517)	2	4.31269e-15	ATC[333]APQHGAPGPGPADASK
0.1.30265							0	825.192	3296.74	3296.71	0.0307076	MS-GF+ Beta (v9517)	4	2.54936e-14	DGNASGTTLLEALDC[333]ILPPTRPTDKPLR
0.1.18918							0	627.818	2507.24	2507.22	0.0186521	MS-GF+ Beta (v9517)	4	2.82301e-14	ESGSLSPEHGPVVVHC[333]SAGIGR
0.1.17401							0	693.085	2768.31	2768.29	0.0211389	MS-GF+ Beta (v9517)	4	4.74563e-14	HELQANC[57]YEEVKDRC[333]TLAEK
0.1.21959							0	1055.54	2109.07	2109.06	0.00783226	MS-GF+ Beta (v9517)	2	4.85338e-14	IISNASC[333]TTNC[57]LAPLAK
0.1.20309							0	755.627	3018.48	3018.45	0.0271525	MS-GF+ Beta (v9517)	4	7.18138e-14	TNHIGHTGYLNTVTVSPDGSLC[333]ASGGK
0.1.30287							0	1099.92	3296.73	3296.71	0.0263874	MS-GF+ Beta (v9517)	3	1.4666e-13	DGNASGTTLLEALDC[333]ILPPTRPTDKPLR
0.1.21923							0	704.032	2109.07	2109.06	0.0149601	MS-GF+ Beta (v9517)	3	9.43053e-13	IISNASC[333]TTNC[57]LAPLAK
0.1.24722							0	822.648	3286.56	3286.53	0.0282785	MS-GF+ Beta (v9517)	4	1.59837e-12	SGDAAIVDM[16]VPGKPMC[333]VESFSDYPPLGR
0.1.28032							0	685.973	3424.83	3424.8	0.0262465	MS-GF+ Beta (v9517)	5	1.8402e-12	KDGNASGTTLLEALDC[333]ILPPTRPTDKPLR
0.1.28006							0	857.215	3424.83	3424.8	0.0270532	MS-GF+ Beta (v9517)	4	2.83891e-12	KDGNASGTTLLEALDC[333]ILPPTRPTDKPLR
0.1.18312							0	670.676	2009	2008.99	0.0119255	MS-GF+ Beta (v9517)	3	3.31951e-12	NYLEPGKEC[333]VQPATK
0.1.18912							0	700.367	2098.08	2098.06	0.0163652	MS-GF+ Beta (v9517)	3	3.88188e-12	EIVHLQAGQC[333]GNQIGAK
0.1.19382							0	681.34	2041	2040.99	0.0127439	MS-GF+ Beta (v9517)	3	4.94656e-12	LM[16]DQNLKC[333]LSAAEEK
0.1.16369							0	689.661	2065.96	2065.95	0.00750472	MS-GF+ Beta (v9517)	3	1.03971e-11	HELQANC[333]YEEVKDR
0.1.14518							0	689.336	2064.99	2064.97	0.0177654	MS-GF+ Beta (v9517)	3	1.15842e-11	ATC[333]APQHGAPGPGPADASK
0.1.18909							0	613.979	1838.92	1838.9	0.0169864	MS-GF+ Beta (v9517)	3	1.51834e-11	YSNSALGHVNC[333]TIK
0.1.30160							0	825.192	3296.74	3296.71	0.0333932	MS-GF+ Beta (v9517)	4	3.76938e-11	DGNASGTTLLEALDC[333]ILPPTRPTDKPLR
0.1.18105							0	645.556	2578.2	2578.18	0.0160293	MS-GF+ Beta (v9517)	4	2.05208e-10	QM[16]EKDETVSDC[333]SPHIANIGR
0.1.31519							0	848.467	2542.38	2542.36	0.0171179	MS-GF+ Beta (v9517)	3	2.39252e-10	GLIAAIC[333]AGPTALLAHEIGFGSK
0.1.18936							0	1050.05	2098.08	2098.06	0.0149746	MS-GF+ Beta (v9517)	2	3.20104e-10	EIVHLQAGQC[333]GNQIGAK
0.1.17432							0	554.671	2768.32	2768.29	0.0285719	MS-GF+ Beta (v9517)	5	3.67718e-10	HELQANC[57]YEEVKDRC[333]TLAEK
0.1.24706							0	1014.82	3041.45	3041.43	0.0210112	MS-GF+ Beta (v9517)	3	3.90251e-10	AYHEQLSVAEITNAC[333]FEPANQM[16]VK
0.1.22300							0	955.491	1908.97	1908.96	0.00667881	MS-GF+ Beta (v9517)	2	5.26255e-10	VNQIGSVTESIQAC[333]K
0.1.24052							0	1023.97	2045.93	2045.92	0.0114495	MS-GF+ Beta (v9517)	2	1.03848e-09	PM[16]C[333]VESFSDYPPLGR
0.1.14663							0	689.333	2064.98	2064.97	0.00824394	MS-GF+ Beta (v9517)	3	1.86535e-09	ATC[333]APQHGAPGPGPADASK
0.1.21184							0	649.661	1945.96	1945.95	0.0148428	MS-GF+ Beta (v9517)	3	2.36761e-09	PGHLQEGFGC[333]VVTNR
0.1.21176							0	973.984	1945.95	1945.95	0.0074098	MS-GF+ Beta (v9517)	2	3.82817e-09	PGHLQEGFGC[333]VVTNR
0.1.18833							0	920.463	1838.91	1838.9	0.0133986	MS-GF+ Beta (v9517)	2	4.08416e-09	YSNSALGHVNC[333]TIK
0.1.14864							0	532.244	2124.95	2124.93	0.0189619	MS-GF+ Beta (v9517)	4	4.26637e-09	EQC[57]C[333]YNC[57]GKPGHLAR
0.1.28067							0	916	1829.99	1829.97	0.0151807	MS-GF+ Beta (v9517)	2	4.69278e-09	SLHDALC[333]VLAQTVK
0.1.19729							0	801.918	1601.82	1601.81	0.00815716	MS-GF+ Beta (v9517)	2	6.29292e-09	IIYGGSVTGATC[333]K
0.1.16924							0	962.461	1922.91	1922.89	0.0135151	MS-GF+ Beta (v9517)	2	8.47208e-09	FNAHGDANTIVC[333]NSK
0.1.18019							0	836.909	1671.8	1671.79	0.0101298	MS-GF+ Beta (v9517)	2	9.33423e-09	YLAEVAC[333]GDDRK
0.1.19132							0	681.343	2041.01	2040.99	0.0202513	MS-GF+ Beta (v9517)	3	2.40888e-08	LM[16]DQNLKC[333]LSAAEEK
0.1.17081							0	877.93	1753.85	1753.83	0.014524	MS-GF+ Beta (v9517)	2	4.02679e-08	SIKDTIC[333]NQDER
0.1.28968							0	765.656	3058.59	3058.56	0.0301288	MS-GF+ Beta (v9517)	4	6.75303e-08	KDGNASGTTLLEALDC[333]ILPPTRPTDK
0.1.17259							0	877.929	1753.84	1753.83	0.0120826	MS-GF+ Beta (v9517)	2	7.03617e-08	SIKDTIC[333]NQDER
0.1.27602							0	981.035	1960.06	1960.05	0.0105332	MS-GF+ Beta (v9517)	2	1.06808e-07	AAVEEGIVLGGGC[333]ALLR
0.1.26255							0	914.09	2739.25	2737.26	1.99285	MS-GF+ Beta (v9517)	3	1.16845e-07	LVTSPC[57]C[333]IVTSTYGWTANM[16]ER
0.1.23541							0	795.75	2384.23	2382.23	2.00206	MS-GF+ Beta (v9517)	3	1.45818e-07	IQEKC[333]QLEINFNTLQTK
0.1.19305							0	762.88	1523.75	1523.74	0.00494209	MS-GF+ Beta (v9517)	2	1.86547e-07	VIGSGC[333]NLDSAR
0.1.19389							0	787.909	1573.8	1573.79	0.0108899	MS-GF+ Beta (v9517)	2	1.91065e-07	AAAPAPVSEAVC[333]R
0.1.23709							0	795.75	2384.23	2382.23	2.00353	MS-GF+ Beta (v9517)	3	1.98418e-07	IQEKC[333]QLEINFNTLQTK
0.1.27622							0	915.995	1829.97	1829.97	0.00382813	MS-GF+ Beta (v9517)	2	2.34791e-07	SLHDALC[333]VLAQTVK
0.1.21059							0	649.661	1945.96	1945.95	0.0128286	MS-GF+ Beta (v9517)	3	2.76833e-07	PGHLQEGFGC[333]VVTNR
0.1.18401							0	1005.51	2009	2008.99	0.00809352	MS-GF+ Beta (v9517)	2	2.80944e-07	NYLEPGKEC[333]VQPATK
0.1.18010							0	558.274	1671.8	1671.79	0.00834647	MS-GF+ Beta (v9517)	3	3.71087e-07	YLAEVAC[333]GDDRK
0.1.17778							0	777.343	1552.67	1552.67	0.00516319	MS-GF+ Beta (v9517)	2	5.38401e-07	YC[333]YYNETHK
0.1.20445							0	805.43	1608.85	1608.83	0.0165007	MS-GF+ Beta (v9517)	2	5.49549e-07	TLIQNC[333]GASTIR
0.1.20830							0	793.908	1585.8	1585.79	0.00881472	MS-GF+ Beta (v9517)	2	5.70172e-07	FIC[333]TTSAIQNR
0.1.29931							0	882.453	2644.34	2644.31	0.0246756	MS-GF+ Beta (v9517)	3	7.11475e-07	NVC[333]LPPEM[16]EVALTEDQVPALK
0.1.18839							0	517.608	1549.8	1549.79	0.00867937	MS-GF+ Beta (v9517)	3	7.85407e-07	GLDVNKC[333]EIAR
0.1.15494							0	479.265	1434.77	1434.77	0.00794296	MS-GF+ Beta (v9517)	3	8.30001e-07	TVAKC[333]QVTPR
0.1.18300							0	707.366	1412.72	1412.71	0.00572607	MS-GF+ Beta (v9517)	2	8.37038e-07	IAVAAQNC[333]YK
0.1.18250							0	671.342	2681.34	2681.33	0.013064	MS-GF+ Beta (v9517)	4	1.26912e-06	HGEVC[333]PAGWKPGSDTIKPDVQK
0.1.18701							0	704.87	1407.73	1407.72	0.00772491	MS-GF+ Beta (v9517)	2	1.41491e-06	ALANSLAC[333]QGK
0.1.17083							0	515.563	1543.67	1543.65	0.0128583	MS-GF+ Beta (v9517)	3	1.51466e-06	SC[333]YDLSC[57]HAR
0.1.20072							0	573.989	1718.94	1718.93	0.0160097	MS-GF+ Beta (v9517)	3	1.52102e-06	ELEKVC[333]NPIITK
0.1.17247							0	585.622	1753.84	1753.83	0.0136563	MS-GF+ Beta (v9517)	3	1.58384e-06	SIKDTIC[333]NQDER
0.1.15156							0	802.698	2405.07	2405.06	0.00917831	MS-GF+ Beta (v9517)	3	1.61669e-06	KGEDEDKGPPC[333]GPVNC[57]NEK
0.1.18370							0	508.929	1523.76	1523.76	0.00886823	MS-GF+ Beta (v9517)	3	1.77411e-06	FAC[333]HSASLTVR
0.1.22741							0	529.286	1584.84	1584.82	0.0145428	MS-GF+ Beta (v9517)	3	1.97866e-06	AVLFC[333]LSEDKK
0.1.20282							0	808.427	1614.84	1614.83	0.0100947	MS-GF+ Beta (v9517)	2	2.06081e-06	HIGVC[333]ISVANNR
0.1.18261							0	570.628	1708.86	1708.85	0.0107501	MS-GF+ Beta (v9517)	3	2.20127e-06	IC[57]TLPEKC[333]AVDK
0.1.22711							0	793.926	1585.84	1584.82	1.0148	MS-GF+ Beta (v9517)	2	2.20238e-06	AVLFC[333]LSEDKK
0.1.14941							0	601.298	1800.87	1800.86	0.0148808	MS-GF+ Beta (v9517)	3	2.482e-06	ELC[333]HTQSSHASLR
0.1.19944							0	502.919	1505.74	1505.73	0.00191874	MS-GF+ Beta (v9517)	3	3.34018e-06	AHVVPC[333]FDASK
0.1.28381							0	755.695	2264.06	2263.07	0.989833	MS-GF+ Beta (v9517)	3	4.2551e-06	C[333]LELFSELAEDKENYK
0.1.18448							0	670.677	2009.01	2008.99	0.0154045	MS-GF+ Beta (v9517)	3	4.37583e-06	NYLEPGKEC[333]VQPATK
0.1.17068							0	585.622	1753.84	1753.83	0.0136563	MS-GF+ Beta (v9517)	3	4.70305e-06	SIKDTIC[333]NQDER
0.1.30219							0	719.695	2156.06	2156.04	0.0226048	MS-GF+ Beta (v9517)	3	4.84455e-06	AVC[333]M[16]LSNTTAIAEAWAR
0.1.15601							0	718.396	1434.78	1434.77	0.0130527	MS-GF+ Beta (v9517)	2	4.93834e-06	TVAKC[333]QVTPR
0.1.19928							0	753.876	1505.74	1505.73	0.00281704	MS-GF+ Beta (v9517)	2	4.94792e-06	AHVVPC[333]FDASK
0.1.16930							0	515.563	1543.67	1543.65	0.0135908	MS-GF+ Beta (v9517)	3	5.12278e-06	SC[57]YDLSC[333]HAR
0.1.20324							0	670.969	2009.88	2009.87	0.0156535	MS-GF+ Beta (v9517)	3	7.1603e-06	C[57]C[57]LTYC[333]FNKPEDK
0.1.15642							0	479.265	1434.77	1434.77	0.00830917	MS-GF+ Beta (v9517)	3	7.21735e-06	TVAKC[333]QVTPR
0.1.22308							0	637.332	1908.97	1908.96	0.0121587	MS-GF+ Beta (v9517)	3	7.6129e-06	VNQIGSVTESIQAC[333]K
0.1.20296							0	547.268	1638.78	1638.76	0.0172924	MS-GF+ Beta (v9517)	3	7.64644e-06	NM[16]SVHLSPC[333]FR
0.1.23703							0	671.672	2012	2011.98	0.0169429	MS-GF+ Beta (v9517)	3	8.87293e-06	KDC[333]EVVM[16]M[16]IGLPGAGK
0.1.18199							0	1011.01	2020	2019.99	0.00858594	MS-GF+ Beta (v9517)	2	8.95219e-06	KPNVGC[333]QQDSEELLK
0.1.16914							0	641.978	1922.91	1922.89	0.0169808	MS-GF+ Beta (v9517)	3	8.97798e-06	FNAHGDANTIVC[333]NSK
0.1.20283							0	723.04	2166.1	2164.07	2.02606	MS-GF+ Beta (v9517)	3	9.16008e-06	KLEEEQIILEDQNC[333]K
0.1.19410							0	1021.5	2041	2040.99	0.00927822	MS-GF+ Beta (v9517)	2	1.3695e-05	LM[16]DQNLKC[333]LSAAEEK
0.1.18449							0	762.889	1523.76	1523.76	0.00701994	MS-GF+ Beta (v9517)	2	1.71687e-05	FAC[333]HSASLTVR
0.1.14588							0	713.86	1425.71	1425.69	0.0127938	MS-GF+ Beta (v9517)	2	1.83456e-05	KC[333]GIQDTNSK
0.1.28770							0	791.082	2370.23	2371.23	-1.00649	MS-GF+ Beta (v9517)	3	2.12014e-05	QTISNAC[333]GTIGLIHAIANNK
0.1.13782							0	845.398	2533.17	2533.16	0.0146181	MS-GF+ Beta (v9517)	3	2.3497e-05	KKGEDEDKGPPC[333]GPVNC[57]NEK
0.1.22961							0	487.265	1458.77	1458.77	0.00922469	MS-GF+ Beta (v9517)	3	2.65038e-05	SIHDALC[333]VIR
0.1.18317							0	487.554	1459.64	1459.63	0.00771208	MS-GF+ Beta (v9517)	3	2.74678e-05	SGQGAFGNMC[333]R
0.1.23593							0	803.399	2407.18	2405.18	1.99317	MS-GF+ Beta (v9517)	3	3.29371e-05	KC[333]LELFTELAEDKENYK
0.1.20066							0	754.392	1506.77	1506.76	0.00901878	MS-GF+ Beta (v9517)	2	3.33278e-05	NNTQVLINC[333]R
0.1.15014							0	687.29	1372.56	1372.56	0.0073722	MS-GF+ Beta (v9517)	2	3.36212e-05	NM[16]M[16]AAC[333]DPR
0.1.20372							0	766.382	1530.75	1530.74	0.0102453	MS-GF+ Beta (v9517)	2	6.0835e-05	TFVSGAC[333]DASIK
0.1.18200							0	471.914	1412.72	1412.71	0.00736074	MS-GF+ Beta (v9517)	3	6.77154e-05	IAVAAQNC[333]YK
0.1.15845							0	583.799	1165.58	1165.58	0.00352553	MS-GF+ Beta (v9517)	2	7.03311e-05	ITGC[333]ASPGK
0.1.19315							0	622.787	1243.56	1243.55	0.00857491	MS-GF+ Beta (v9517)	2	7.147e-05	AC[333]VMM[16]QGR
0.1.15076							0	630.785	1259.56	1259.55	0.00975403	MS-GF+ Beta (v9517)	2	7.277e-05	AC[333]VM[16]M[16]QGR
0.1.10219							0	517.6	1549.78	1549.77	0.0118588	MS-GF+ Beta (v9517)	3	7.66703e-05	KC[333]NTDQAGRPK
0.1.18682							0	470.249	1407.72	1407.72	0.00606368	MS-GF+ Beta (v9517)	3	9.86091e-05	ALANSLAC[333]QGK
0.1.23833							0	671.671	2011.99	2011.98	0.0143795	MS-GF+ Beta (v9517)	3	0.000102758	KDC[333]EVVM[16]M[16]IGLPGAGK
0.1.15006							0	743.846	1485.68	1485.67	0.00613269	MS-GF+ Beta (v9517)	2	0.000105946	TAGQTGM[16]C[333]GGVR
0.1.13332							0	684.346	1366.68	1366.67	0.0103539	MS-GF+ Beta (v9517)	2	0.000110388	EALNSC[333]NKR
0.1.23761							0	803.9	1605.79	1605.77	0.0108153	MS-GF+ Beta (v9517)	2	0.000113586	DVIEEYFKC[333]K
0.1.18187							0	674.342	2020.01	2019.99	0.0114413	MS-GF+ Beta (v9517)	3	0.000116245	KPNVGC[333]QQDSEELLK
0.1.14392							0	476.243	1425.71	1425.69	0.0141233	MS-GF+ Beta (v9517)	3	0.000139931	KC[333]GIQDTNSK
0.1.15408							0	729.868	1457.72	1457.72	-0.000231802	MS-GF+ Beta (v9517)	2	0.000145991	EKPVC[333]GTTYK
0.1.15569							0	604.307	1809.9	1809.89	0.01294	MS-GF+ Beta (v9517)	3	0.000171546	M[16]RPGVAC[333]SVSQAQK
0.1.13811							0	600.286	1198.56	1198.55	0.0108152	MS-GF+ Beta (v9517)	2	0.000189501	ANAAAM[16]C[333]AK
0.1.13476							0	684.344	1366.67	1366.67	0.00766832	MS-GF+ Beta (v9517)	2	0.000207916	EALNSC[333]NKR
0.1.20552							0	505.6	1513.78	1512.77	1.01335	MS-GF+ Beta (v9517)	3	0.000208261	VAC[333]IGAWHPAR
0.1.14637							0	397.444	1585.75	1585.74	0.00958748	MS-GF+ Beta (v9517)	4	0.000217477	KC[333]YEM[16]ASHLR
0.1.20078							0	860.477	1718.94	1718.93	0.012422	MS-GF+ Beta (v9517)	2	0.00024262	ELEKVC[333]NPIITK
0.1.18398							0	498.621	1492.84	1492.83	0.00742383	MS-GF+ Beta (v9517)	3	0.000286654	LLIEKC[333]NTVK
0.1.18703							0	531.61	1591.81	1591.79	0.0153349	MS-GF+ Beta (v9517)	3	0.000309043	ALRPGDPGFC[333]AR
0.1.20306							0	628.335	1254.66	1254.64	0.0124903	MS-GF+ Beta (v9517)	2	0.000310979	YVLC[333]TAPR
0.1.16760							0	512.586	1534.74	1534.73	0.0083538	MS-GF+ Beta (v9517)	3	0.000368852	HC[333]NM[16]VLENVK
0.1.16724							0	447.903	1340.69	1340.68	0.00987173	MS-GF+ Beta (v9517)	3	0.000413271	ISIC[333]SSDKR
0.1.14648							0	442.88	1325.62	1325.61	0.00853909	MS-GF+ Beta (v9517)	3	0.000438563	M[16]LPDKDC[333]R
0.1.10782							0	704.354	1406.69	1406.68	0.0139021	MS-GF+ Beta (v9517)	2	0.000447629	KC[333]AC[57]ASHVAK
0.1.17084							0	772.841	1543.67	1543.65	0.0122613	MS-GF+ Beta (v9517)	2	0.000471611	SC[333]YDLSC[57]HAR
0.1.16685							0	425.556	1273.65	1273.64	0.00828375	MS-GF+ Beta (v9517)	3	0.000473239	ATYDKLC[333]K
0.1.16570							0	425.555	1273.64	1273.64	0.00462164	MS-GF+ Beta (v9517)	3	0.000475173	ATYDKLC[333]K
0.1.17160							0	684.357	1366.7	1366.69	0.00717441	MS-GF+ Beta (v9517)	2	0.000523751	INQLC[333]SQTK
0.1.26834							0	731.875	2923.47	2923.45	0.0211616	MS-GF+ Beta (v9517)	4	0.000525349	AELAESKC[333]SELEEELKNVTNNLK
0.1.17336							0	518.567	1552.68	1552.67	0.0124131	MS-GF+ Beta (v9517)	3	0.000530524	YC[333]YYNETHK
0.1.20176							0	505.93	1514.77	1514.76	0.0129562	MS-GF+ Beta (v9517)	3	0.000530799	KETGAASFLC[333]R
0.1.22701							0	487.265	1458.77	1458.77	0.00812606	MS-GF+ Beta (v9517)	3	0.000532359	SIHDALC[333]VIR
0.1.18476							0	500.239	1497.7	1497.69	0.00720681	MS-GF+ Beta (v9517)	3	0.00053811	MM[16]IPDC[333]QRR
0.1.14261							0	749.362	1496.71	1496.7	0.00608113	MS-GF+ Beta (v9517)	2	0.000542165	TGSQGQC[333]TQVR
0.1.20137							0	774.382	1546.75	1546.73	0.0152086	MS-GF+ Beta (v9517)	2	0.000583061	TTQFSC[333]TLGEK
0.1.21040							0	628.862	1255.71	1255.7	0.00917054	MS-GF+ Beta (v9517)	2	0.000603572	AVLC[333]PPPVK
0.1.14651							0	793.878	1585.74	1585.74	0.00277811	MS-GF+ Beta (v9517)	2	0.000665476	KC[333]YEM[16]ASHLR
0.1.16692							0	637.83	1273.64	1273.64	0.00704581	MS-GF+ Beta (v9517)	2	0.000685526	ATYDKLC[333]K
0.1.17627							0	730.826	1459.64	1459.63	0.00360549	MS-GF+ Beta (v9517)	2	0.000699268	SGQGAFGNMC[333]R
0.1.16864							0	615.278	1228.54	1228.54	0.0038018	MS-GF+ Beta (v9517)	2	0.000737981	PTC[57]PYC[333]R
0.1.16597							0	447.9	1340.68	1340.68	0.00364615	MS-GF+ Beta (v9517)	3	0.000754047	ISIC[333]SSDKR
0.1.22560							0	713.358	1424.7	1425.71	-1.00612	MS-GF+ Beta (v9517)	2	0.000779327	C[333]PFTGNVSIR
0.1.14885							0	529.591	1585.75	1585.74	0.0121032	MS-GF+ Beta (v9517)	3	0.000800981	KC[333]YEM[16]ASHLR
0.1.18836							0	775.908	1549.8	1549.79	0.009303	MS-GF+ Beta (v9517)	2	0.000807451	GLDVNKC[333]EIAR
0.1.16932							0	772.839	1543.66	1543.65	0.00908744	MS-GF+ Beta (v9517)	2	0.00090878	SC[333]YDLSC[57]HAR
0.1.16875							0	738.829	1475.64	1475.63	0.0143061	MS-GF+ Beta (v9517)	2	0.000929762	SGQGAFGNM[16]C[333]R
0.1.15420							0	674.823	1347.63	1347.62	0.00799737	MS-GF+ Beta (v9517)	2	0.000931367	EEHLC[333]TQR
0.1.16629							0	512.586	1534.74	1534.73	0.00926933	MS-GF+ Beta (v9517)	3	0.000939585	HC[333]NM[16]VLENVK
0.1.22242							0	734.392	1466.77	1466.76	0.00980127	MS-GF+ Beta (v9517)	2	0.000945786	ATVFLNPAAC[333]K
0.1.25043							0	852.434	2554.28	2552.27	2.00666	MS-GF+ Beta (v9517)	3	0.000950043	GPAIGIDLGTTYSC[333]VGVFQHGK
0.1.16889							0	710.399	1418.78	1418.77	0.012606	MS-GF+ Beta (v9517)	2	0.000950182	LNKC[333]GVISPR
0.1.24187							0	945.957	1889.9	1889.88	0.01843	MS-GF+ Beta (v9517)	2	0.000951658	IIPGFM[16]C[333]QGGDFTR
0.1.17621							0	459.597	1375.77	1375.76	0.00430722	MS-GF+ Beta (v9517)	3	0.00100449	QVLIRPC[333]SK
0.1.14845							0	397.445	1585.75	1585.74	0.0114185	MS-GF+ Beta (v9517)	4	0.00103289	KC[333]YEM[16]ASHLR
0.1.28156							0	1429.67	2857.33	2855.31	2.02167	MS-GF+ Beta (v9517)	2	0.00104355	LC[333]YVALDFEQEMAMAASSSSLEK
0.1.14570							0	618.776	1235.54	1235.53	0.00543735	MS-GF+ Beta (v9517)	2	0.0010605	AYGGSM[16]C[333]AK
0.1.11852							0	620.308	1238.6	1238.6	0.00484738	MS-GF+ Beta (v9517)	2	0.00108672	KTPC[333]GEGSK
0.1.17122							0	500.242	1497.7	1497.69	0.0147141	MS-GF+ Beta (v9517)	3	0.00108933	M[16]MIPDC[333]QRR
0.1.18348							0	500.24	1497.7	1497.69	0.00821389	MS-GF+ Beta (v9517)	3	0.00109899	MM[16]IPDC[333]QRR
0.1.16725							0	671.35	1340.69	1340.68	0.0103733	MS-GF+ Beta (v9517)	2	0.00111663	ISIC[333]SSDKR
0.1.10315							0	585.294	1168.57	1168.57	0.00789092	MS-GF+ Beta (v9517)	2	0.00113089	KNASC[333]GTR
0.1.21393							0	652.828	1303.64	1303.63	0.0104555	MS-GF+ Beta (v9517)	2	0.00120164	SAFLC[333]GVM[16]K
0.1.14619							0	529.591	1585.75	1585.74	0.0139343	MS-GF+ Beta (v9517)	3	0.00121228	KC[333]YEM[16]ASHLR
0.1.22573							0	634.828	2535.28	2533.28	2.00397	MS-GF+ Beta (v9517)	4	0.00121721	KC[333]LELFTELAEDKENYKK
0.1.11865							0	563.273	1124.53	1124.53	0.00395722	MS-GF+ Beta (v9517)	2	0.00121806	VNNSC[333]QK
0.1.21090							0	419.576	1255.71	1255.7	0.00650223	MS-GF+ Beta (v9517)	3	0.00127822	AVLC[333]PPPVK
0.1.14924							0	630.784	1259.55	1259.55	0.00767884	MS-GF+ Beta (v9517)	2	0.00141425	AC[333]VM[16]M[16]QGR
0.1.17064							0	641.978	1922.91	1922.89	0.0166146	MS-GF+ Beta (v9517)	3	0.00150312	FNAHGDANTIVC[333]NSK
0.1.18363							0	538.608	1612.8	1612.79	0.0101124	MS-GF+ Beta (v9517)	3	0.00151505	LC[333]DSYEIRPGK
0.1.16767							0	421.54	1261.6	1261.59	0.00668316	MS-GF+ Beta (v9517)	3	0.00152678	WC[333]NEHLK
0.1.14556							0	522.75	1043.49	1043.48	0.00741581	MS-GF+ Beta (v9517)	2	0.00158496	M[16]VGC[333]TGK
0.1.18954							0	603.651	1807.93	1807.91	0.0182112	MS-GF+ Beta (v9517)	3	0.00159185	KVEELQAC[333]VETAR
0.1.17437							0	602.305	1202.6	1202.59	0.0092502	MS-GF+ Beta (v9517)	2	0.00160152	HC[333]DLQVR
0.1.28374							0	953.446	2857.32	2855.31	2.00896	MS-GF+ Beta (v9517)	3	0.00167018	LC[333]YVALDFEQEMAMAASSSSLEK
0.1.24257							0	623.868	1245.72	1245.72	0.00597165	MS-GF+ Beta (v9517)	2	0.00168681	LPVLAGC[333]LK
0.1.18648							0	605.814	1209.61	1209.61	0.00795043	MS-GF+ Beta (v9517)	2	0.0017386	GC[333]EVVVSGK
0.1.17430							0	413.54	1237.6	1237.59	0.00567608	MS-GF+ Beta (v9517)	3	0.00175332	ITEFC[333]HR
0.1.26108							0	757.371	3025.46	3025.43	0.023603	MS-GF+ Beta (v9517)	4	0.00177151	AYHEQLSVAEITNAC[333]FEPANQMVK
0.1.20582							0	757.394	1512.77	1512.77	0.00811151	MS-GF+ Beta (v9517)	2	0.00181951	VAC[333]IGAWHPAR
0.1.15469							0	486.918	1457.73	1457.72	0.0100393	MS-GF+ Beta (v9517)	3	0.00182231	EKPVC[333]GTTYK
0.1.16800							0	411.227	1230.66	1230.65	0.00551613	MS-GF+ Beta (v9517)	3	0.00189883	IAVHC[333]TVR
0.1.20070							0	503.263	1506.77	1506.76	0.00546546	MS-GF+ Beta (v9517)	3	0.0019499	NNTQVLINC[333]R
0.1.17020							0	738.825	1475.63	1475.63	0.00637153	MS-GF+ Beta (v9517)	2	0.00236502	SGQGAFGNM[16]C[333]R
0.1.19393							0	548.302	1094.59	1094.58	0.00950284	MS-GF+ Beta (v9517)	2	0.0024642	LNVC[333]VSK
0.1.27601							0	611.002	1829.98	1829.97	0.0130312	MS-GF+ Beta (v9517)	3	0.00267183	SLHDALC[333]VLAQTVK
0.1.16604							0	525.279	1048.54	1048.54	0.00510301	MS-GF+ Beta (v9517)	2	0.00272984	APQC[333]LGK
0.1.28112							0	953.45	2857.33	2855.31	2.02232	MS-GF+ Beta (v9517)	3	0.00325688	LC[333]YVALDFEQEMAMAASSSSLEK
0.1.19173							0	1021.5	2040.99	2040.99	0.00708095	MS-GF+ Beta (v9517)	2	0.00346276	LM[16]DQNLKC[333]LSAAEEK
0.1.17756							0	459.598	1375.77	1375.76	0.00888486	MS-GF+ Beta (v9517)	3	0.00355281	QVLIRPC[333]SK
0.1.19449							0	691.863	1381.71	1381.71	0.00108882	MS-GF+ Beta (v9517)	2	0.00362281	VVGC[333]SC[57]VVVK
0.1.13931							0	602.803	1203.59	1203.58	0.0103391	MS-GF+ Beta (v9517)	2	0.00370717	HQSLQC[333]R
0.1.20847							0	419.579	1255.71	1255.7	0.0138264	MS-GF+ Beta (v9517)	3	0.00373654	AVLC[333]PPPVK
0.1.10266							0	549.776	1097.54	1097.53	0.0088719	MS-GF+ Beta (v9517)	2	0.00430833	KC[333]SASNR
0.1.23492							0	1020.15	3057.44	3055.44	2.00036	MS-GF+ Beta (v9517)	3	0.0043565	AYHEQLTVAEITNAC[333]FEPANQM[16]VK
0.1.21422							0	803.408	1604.8	1604.79	0.0104558	MS-GF+ Beta (v9517)	2	0.00438082	EYKC[333]GDLVFAK
0.1.30515							0	1180.2	3537.58	3538.57	-0.993418	MS-GF+ Beta (v9517)	3	0.00440151	C[333]PEALFQPCFLGMESC[57]GIHETTFNSIM[16]K
0.1.14856							0	549.278	1096.54	1096.53	0.00839333	MS-GF+ Beta (v9517)	2	0.0048409	ATNVC[333]TR
0.1.21380							0	535.942	1604.8	1604.79	0.0125788	MS-GF+ Beta (v9517)	3	0.00511938	EYKC[333]GDLVFAK
0.1.20931							0	607.57	2426.25	2425.23	1.02144	MS-GF+ Beta (v9517)	4	0.00519866	KQLEEAFKQQAATEC[333]QLK
0.1.29572							0	815.75	2444.23	2443.21	1.01878	MS-GF+ Beta (v9517)	3	0.0054176	KPVTDC[333]VISVPSFFTDAER
0.1.19195							0	622.788	1243.56	1243.55	0.00991769	MS-GF+ Beta (v9517)	2	0.00582604	AC[333]VMM[16]QGR
0.1.21046							0	639.851	1277.69	1277.68	0.00711483	MS-GF+ Beta (v9517)	2	0.00610247	IAQLIC[333]ER
0.1.22935							0	704.034	2109.08	2109.06	0.0189884	MS-GF+ Beta (v9517)	3	0.00611263	IISNASC[57]TTNC[333]LAPLAK
0.1.16911							0	577.781	1153.55	1153.54	0.00957097	MS-GF+ Beta (v9517)	2	0.0062651	NMAC[333]VQR
0.1.16711							0	365.197	1092.57	1092.56	0.00634079	MS-GF+ Beta (v9517)	3	0.0063747	TIAPC[333]QK
0.1.30621							0	1180.2	3537.58	3538.57	-0.995981	MS-GF+ Beta (v9517)	3	0.00642629	C[333]PEALFQPCFLGMESC[57]GIHETTFNSIM[16]K
0.1.15025							0	522.749	1043.48	1043.47	0.00785695	MS-GF+ Beta (v9517)	2	0.00643987	YSPNC[333]K
0.1.14876							0	522.748	1043.48	1043.47	0.00736867	MS-GF+ Beta (v9517)	2	0.00644233	YSPNC[333]K
0.1.12467							0	521.245	1040.48	1040.47	0.00531976	MS-GF+ Beta (v9517)	2	0.00651802	NASC[333]GTR
0.1.18777							0	542.294	1623.86	1623.84	0.0152986	MS-GF+ Beta (v9517)	3	0.00681095	IKNC[333]LNPQFSK
0.1.18567							0	524.8	1047.59	1047.58	0.00766764	MS-GF+ Beta (v9517)	2	0.00736053	AVVVC[333]PK
0.1.15187							0	645.804	1289.59	1289.58	0.0124894	MS-GF+ Beta (v9517)	2	0.00761579	DKMC[333]SM[16]VK
0.1.26737							0	605.343	1208.67	1208.66	0.00807632	MS-GF+ Beta (v9517)	2	0.00769225	GIFPVLC[333]K
0.1.10312							0	366.853	1097.54	1097.53	0.00760739	MS-GF+ Beta (v9517)	3	0.00771365	KC[333]SASNR
0.1.18609							0	524.801	1047.59	1047.58	0.00791179	MS-GF+ Beta (v9517)	2	0.00777104	AVVVC[333]PK
0.1.16873							0	441.907	1322.7	1322.69	0.00810168	MS-GF+ Beta (v9517)	3	0.00777466	KC[333]LEELQK
0.1.28253							0	953.45	2857.33	2855.31	2.02104	MS-GF+ Beta (v9517)	3	0.00779174	LC[333]YVALDFEQEMAMAASSSSLEK
0.1.28496							0	953.45	2857.33	2855.31	2.02141	MS-GF+ Beta (v9517)	3	0.00787407	LC[333]YVALDFEQEMAMAASSSSLEK
0.1.18313							0	431.57	1291.69	1291.68	0.00353937	MS-GF+ Beta (v9517)	3	0.00829227	ELC[333]ELKPK
0.1.17842							0	554.3	1106.59	1106.58	0.00620694	MS-GF+ Beta (v9517)	2	0.00839945	QPISC[333]VK
0.1.18094							0	683.369	1364.72	1364.71	0.0106089	MS-GF+ Beta (v9517)	2	0.00841575	KC[333]AADLGLNK
0.1.18446							0	431.571	1291.69	1291.68	0.0063775	MS-GF+ Beta (v9517)	3	0.00854331	ELC[333]ELKPK
0.1.29392							0	791.084	2370.23	2371.23	-1.00027	MS-GF+ Beta (v9517)	3	0.00864509	QTISNAC[333]GTIGLIHAIANNK
0.1.16881							0	622.786	1243.56	1243.55	0.00723214	MS-GF+ Beta (v9517)	2	0.00874961	AC[333]VM[16]MQGR
0.1.17914							0	520.78	1039.54	1039.54	0.00763462	MS-GF+ Beta (v9517)	2	0.00879842	LGSISC[333]K
0.1.15448							0	706.785	1411.56	1411.55	0.00941845	MS-GF+ Beta (v9517)	2	0.0088312	YDDM[16]AAC[333]M[16]K
0.1.30958							0	502.699	1003.38	1004.4	-1.01153	MS-GF+ Beta (v9517)	2	0.00896243	CC[333]CCIK
0.1.24193							0	670.627	2008.86	2009.87	-1.009	MS-GF+ Beta (v9517)	3	0.00926009	C[57]C[333]LTYC[57]FNKPEDK
0.1.19324							0	557.793	1113.57	1113.56	0.00760664	MS-GF+ Beta (v9517)	2	0.00949583	YC[333]QVIR
0.1.27995							0	953.447	2857.32	2855.31	2.01097	MS-GF+ Beta (v9517)	3	0.00952805	LC[333]YVALDFEQEMAMAASSSSLEK
0.1.14886							0	585.778	1169.54	1169.53	0.00965146	MS-GF+ Beta (v9517)	2	0.00976125	NM[16]AC[333]VQR
0.1.16555							0	631.805	1261.6	1261.59	0.00425504	MS-GF+ Beta (v9517)	2	0.00979148	WC[333]NEHLK
0.1.19508							0	813.06	2436.16	2436.15	0.0123863	MS-GF+ Beta (v9517)	3	0.00987276	KYEDIC[333]PSTHNMDVPNIK
0.1.19035							0	609.289	1824.85	1824.83	0.0175056	MS-GF+ Beta (v9517)	3	0.0107331	ELPGHTGYLSC[333]C[57]R
0.1.24581							0	545.825	1089.63	1089.63	0.00930144	MS-GF+ Beta (v9517)	2	0.0109121	AILPC[333]IK
0.1.16666							0	521.747	1041.48	1041.47	0.00597311	MS-GF+ Beta (v9517)	2	0.010955	TLC[333]GC[57]R
0.1.19840							0	610.843	1219.67	1219.66	0.00856874	MS-GF+ Beta (v9517)	2	0.0115477	VC[333]NPIITK
0.1.12575							0	475.731	949.448	949.444	0.0036373	MS-GF+ Beta (v9517)	2	0.0116218	PGQC[333]GR
0.1.11829							0	413.876	1238.61	1238.6	0.00870983	MS-GF+ Beta (v9517)	3	0.0116779	KTPC[333]GEGSK
0.1.17572							0	650.329	1298.64	1298.64	0.00744945	MS-GF+ Beta (v9517)	2	0.0118597	LQISM[16]C[333]QK
0.1.14503							0	469.235	936.456	936.449	0.00718706	MS-GF+ Beta (v9517)	2	0.0119315	TGAPC[333]R
0.1.14647							0	469.235	936.455	936.449	0.00663774	MS-GF+ Beta (v9517)	2	0.0119318	TGAPC[333]R
0.1.8420							0	403.547	1207.62	1207.61	0.00502669	MS-GF+ Beta (v9517)	3	0.0119518	RC[333]TKPDR
0.1.17655							0	550.275	1647.8	1647.79	0.00907889	MS-GF+ Beta (v9517)	3	0.0133285	KGDEC[333]ELLGHSK
0.1.16868							0	853.342	1704.67	1702.67	1.99924	MS-GF+ Beta (v9517)	2	0.0135314	LCC[333]C[57]PRC[57]CCPR
0.1.16982							0	755.915	1509.82	1509.8	0.0108621	MS-GF+ Beta (v9517)	2	0.0145262	KVVGC[333]SC[57]VVVK
0.1.9708							0	509.274	1016.53	1016.52	0.0103187	MS-GF+ Beta (v9517)	2	0.0147203	LVGHC[333]R
0.1.14590							0	495.257	988.499	988.491	0.00792747	MS-GF+ Beta (v9517)	2	0.0147582	HC[333]GALR
0.1.31856							0	930.45	1858.89	1858.87	0.0107721	MS-GF+ Beta (v9517)	2	0.0150027	WC[333]DC[333]KLPNSK
0.1.11775							0	653.799	1305.58	1305.58	0.00756499	MS-GF+ Beta (v9517)	2	0.0157167	DKM[16]C[333]SM[16]VK
0.1.16722							0	362.865	1085.57	1085.57	0.00363713	MS-GF+ Beta (v9517)	3	0.0158652	HLPGVC[333]K
0.1.18241							0	462.274	1383.8	1383.79	0.00553335	MS-GF+ Beta (v9517)	3	0.0161255	AVLC[333]PPPVKK
0.1.17793							0	429.56	1285.66	1284.65	1.00448	MS-GF+ Beta (v9517)	3	0.0163263	AKFENLC[333]K
0.1.11759							0	375.864	1124.57	1124.56	0.00506454	MS-GF+ Beta (v9517)	3	0.0163477	KC[333]SEVAR
0.1.22374							0	599.316	1196.62	1196.6	0.0127763	MS-GF+ Beta (v9517)	2	0.0165938	SILC[333]C[57]LR
0.1.17834							0	634.306	1266.6	1266.58	0.0126737	MS-GF+ Beta (v9517)	2	0.0173328	NPVSQC[333]MR
0.1.19551							0	543.772	1085.53	1085.52	0.00790383	MS-GF+ Beta (v9517)	2	0.0173499	FENLC[333]K
0.1.24381							0	764.072	2289.19	2290.18	-0.98942	MS-GF+ Beta (v9517)	3	0.0175131	KPQVNKRPVLWC[57]SSC[333]R
0.1.26441							0	605.344	1208.67	1208.66	0.0112501	MS-GF+ Beta (v9517)	2	0.018049	GIFPVLC[333]K
0.1.21104							0	809.755	2426.24	2425.23	1.012	MS-GF+ Beta (v9517)	3	0.0180723	KQLEEAFKQQAATEC[333]QLK
0.1.14483							0	747.841	1493.67	1493.66	0.00954244	MS-GF+ Beta (v9517)	2	0.0183942	GNSPPSSGEAC[333]R
0.1.19557							0	768.376	1534.74	1534.73	0.0105033	MS-GF+ Beta (v9517)	2	0.0185504	HC[333]NM[16]VLENVK
0.1.15279							0	684.348	1366.68	1366.68	0.00107381	MS-GF+ Beta (v9517)	2	0.0187565	KC[333]STPEEIK
0.1.18096							0	486.597	1456.77	1456.76	0.00781251	MS-GF+ Beta (v9517)	3	0.0188364	AVAILC[333]NHQR
0.1.21064							0	509.614	1525.82	1525.81	0.0121915	MS-GF+ Beta (v9517)	3	0.018904	LLEC[333]PHLNVR
0.1.19235							0	660.842	1319.67	1317.66	2.01153	MS-GF+ Beta (v9517)	2	0.0193079	C[333]SCPLLPPR
0.1.20892							0	809.759	2426.25	2425.23	1.02262	MS-GF+ Beta (v9517)	3	0.0194449	KQLEEAFKQQAATEC[333]QLK
JY_DYn2_vitro_Sulfenylome_20150416_BR1	151	198	230	2	4	179
0.1.17028							0	923.776	2768.3	2768.29	0.0150486	MS-GF+ Beta (v9517)	3	6.6334e-19	HELQANC[57]YEEVKDRC[333]TLAEK
0.1.17156							0	923.774	2768.3	2768.29	0.0101048	MS-GF+ Beta (v9517)	3	1.1877e-18	HELQANC[57]YEEVKDRC[333]TLAEK
0.1.29791							0	1099.92	3296.73	3296.71	0.020528	MS-GF+ Beta (v9517)	3	1.27938e-17	DGNASGTTLLEALDC[333]ILPPTRPTDKPLR
0.1.17133							0	693.083	2768.3	2768.29	0.0118615	MS-GF+ Beta (v9517)	4	3.96572e-16	HELQANC[57]YEEVKDRC[333]TLAEK
0.1.29819							0	825.191	3296.73	3296.71	0.0272897	MS-GF+ Beta (v9517)	4	1.094e-15	DGNASGTTLLEALDC[333]ILPPTRPTDKPLR
0.1.21388							0	1055.54	2109.07	2109.06	0.010762	MS-GF+ Beta (v9517)	2	1.02087e-14	IISNASC[333]TTNC[57]LAPLAK
0.1.21289							0	1055.54	2109.07	2109.06	0.00856468	MS-GF+ Beta (v9517)	2	1.40973e-14	IISNASC[333]TTNC[57]LAPLAK
0.1.17651							0	860.405	2578.19	2578.18	0.0147609	MS-GF+ Beta (v9517)	3	3.15373e-14	QM[16]EKDETVSDC[333]SPHIANIGR
0.1.17005							0	693.085	2768.31	2768.29	0.0223596	MS-GF+ Beta (v9517)	4	1.18176e-13	HELQANC[57]YEEVKDRC[333]TLAEK
0.1.31115							0	848.468	2542.38	2542.36	0.0204138	MS-GF+ Beta (v9517)	3	7.18153e-13	GLIAAIC[333]AGPTALLAHEIGFGSK
0.1.21309							0	704.032	2109.07	2109.06	0.0134952	MS-GF+ Beta (v9517)	3	1.72624e-12	IISNASC[333]TTNC[57]LAPLAK
0.1.29754							0	660.354	3296.73	3296.71	0.0255063	MS-GF+ Beta (v9517)	5	3.30607e-12	DGNASGTTLLEALDC[333]ILPPTRPTDKPLR
0.1.18683							0	681.338	2040.99	2040.99	0.00541972	MS-GF+ Beta (v9517)	3	3.38918e-12	LM[16]DQNLKC[333]LSAAEEK
0.1.17883							0	670.677	2009.01	2008.99	0.0168693	MS-GF+ Beta (v9517)	3	3.90831e-12	NYLEPGKEC[333]VQPATK
0.1.29715							0	825.191	3296.73	3296.71	0.0270455	MS-GF+ Beta (v9517)	4	5.64014e-12	DGNASGTTLLEALDC[333]ILPPTRPTDKPLR
0.1.15803							0	689.663	2065.97	2065.95	0.0139134	MS-GF+ Beta (v9517)	3	6.95191e-12	HELQANC[333]YEEVKDR
0.1.17645							0	645.557	2578.2	2578.18	0.0179824	MS-GF+ Beta (v9517)	4	3.04869e-11	QM[16]EKDETVSDC[333]SPHIANIGR
0.1.14363							0	532.244	2124.95	2124.93	0.0162763	MS-GF+ Beta (v9517)	4	5.38867e-11	EQC[57]C[333]YNC[57]GKPGHLAR
0.1.24212							0	1014.82	3041.45	3041.43	0.0237578	MS-GF+ Beta (v9517)	3	7.15533e-11	AYHEQLSVAEITNAC[333]FEPANQM[16]VK
0.1.18325							0	613.977	1838.91	1838.9	0.0109439	MS-GF+ Beta (v9517)	3	1.30555e-10	YSNSALGHVNC[333]TIK
0.1.21765							0	955.487	1908.96	1908.96	-0.00284268	MS-GF+ Beta (v9517)	2	1.83743e-10	VNQIGSVTESLQAC[333]K
0.1.18437							0	613.978	1838.91	1838.9	0.0147891	MS-GF+ Beta (v9517)	3	1.94059e-10	YSNSALGHVNC[333]TIK
0.1.14121							0	689.334	2064.98	2064.97	0.0122723	MS-GF+ Beta (v9517)	3	2.08168e-10	ATC[333]APQHGAPGPGPADASK
0.1.25901							0	1101.86	3302.56	3302.53	0.0253815	MS-GF+ Beta (v9517)	3	3.60901e-10	SGDAAIVDM[16]VPGKPM[16]C[333]VESFSDYPPLGR
0.1.16521							0	962.458	1922.9	1922.89	0.00753363	MS-GF+ Beta (v9517)	2	9.84158e-10	FNAHGDANTIVC[333]NSK
0.1.20615							0	649.658	1945.95	1945.95	0.00660306	MS-GF+ Beta (v9517)	3	1.0532e-09	PGHLQEGFGC[333]VVTNR
0.1.19160							0	801.915	1601.82	1601.81	0.00303021	MS-GF+ Beta (v9517)	2	1.52977e-09	IIYGGSVTGATC[333]K
0.1.18411							0	700.367	2098.08	2098.06	0.0154496	MS-GF+ Beta (v9517)	3	1.84405e-09	EIVHLQAGQC[333]GNQIGAK
0.1.18839							0	762.88	1523.75	1523.74	0.00543037	MS-GF+ Beta (v9517)	2	6.89048e-09	VIGSGC[333]NLDSAR
0.1.21767							0	637.332	1908.97	1908.96	0.0121587	MS-GF+ Beta (v9517)	3	7.78251e-09	VNQIGSVTESLQAC[333]K
0.1.18378							0	920.461	1838.91	1838.9	0.00802749	MS-GF+ Beta (v9517)	2	1.02956e-08	YSNSALGHVNC[333]TIK
0.1.18531							0	700.366	2098.08	2098.06	0.0136186	MS-GF+ Beta (v9517)	3	1.08893e-08	EIVHIQAGQC[333]GNQIGAK
0.1.13984							0	689.334	2064.98	2064.97	0.0115398	MS-GF+ Beta (v9517)	3	1.12893e-08	ATC[333]APQHGAPGPGPADASK
0.1.17587							0	836.91	1671.81	1671.79	0.0125712	MS-GF+ Beta (v9517)	2	2.79141e-08	YLAEVAC[333]GDDRK
0.1.16828							0	877.927	1753.84	1753.83	0.00939708	MS-GF+ Beta (v9517)	2	2.8717e-08	SIKDTIC[333]NQDER
0.1.19817							0	670.969	2009.88	2009.87	0.0156535	MS-GF+ Beta (v9517)	3	3.16039e-08	C[57]C[57]LTYC[333]FNKPEDK
0.1.18872							0	787.906	1573.8	1573.79	0.00576296	MS-GF+ Beta (v9517)	2	3.3323e-08	AAAPAPVSEAVC[333]R
0.1.17112							0	554.667	2768.3	2768.29	0.00965099	MS-GF+ Beta (v9517)	5	4.81726e-08	HELQANC[57]YEEVKDRC[333]TLAEK
0.1.29332							0	882.453	2644.34	2644.31	0.0237601	MS-GF+ Beta (v9517)	3	4.95004e-08	NVC[333]LPPEM[16]EVALTEDQVPALK
0.1.16666							0	877.923	1753.83	1753.83	0.00121837	MS-GF+ Beta (v9517)	2	6.11357e-08	SIKDTIC[333]NQDER
0.1.21341							0	818.433	1634.85	1634.85	0.00597763	MS-GF+ Beta (v9517)	2	6.14846e-08	NTGIIC[333]TIGPASR
0.1.18873							0	525.609	1573.8	1573.79	0.0117922	MS-GF+ Beta (v9517)	3	6.25193e-08	AAAPAPVSEAVC[333]R
0.1.17584							0	558.277	1671.81	1671.79	0.0173186	MS-GF+ Beta (v9517)	3	6.67268e-08	YLAEVAC[333]GDDRK
0.1.19101							0	534.946	1601.82	1601.81	0.00521419	MS-GF+ Beta (v9517)	3	8.26383e-08	IIYGGSVTGATC[333]K
0.1.22935							0	795.75	2384.23	2382.23	2.00206	MS-GF+ Beta (v9517)	3	9.53832e-08	IQEKC[333]QLEINFNTLQTK
0.1.19068							0	819.452	1636.89	1636.89	0.00374966	MS-GF+ Beta (v9517)	2	9.8113e-08	LLVGNKC[333]DLTTK
0.1.25610							0	914.094	2739.26	2737.26	2.00457	MS-GF+ Beta (v9517)	3	1.28598e-07	LVTSPC[333]C[57]IVTSTYGWTANM[16]ER
0.1.20229							0	793.908	1585.8	1585.79	0.009303	MS-GF+ Beta (v9517)	2	1.3448e-07	FIC[333]TTSAIQNR
0.1.15123							0	479.263	1434.77	1434.77	0.00226669	MS-GF+ Beta (v9517)	3	2.04789e-07	TVAKC[333]QVTPR
0.1.22727							0	704.029	2109.07	2109.06	0.00598792	MS-GF+ Beta (v9517)	3	2.04923e-07	IISNASC[57]TTNC[333]LAPLAK
0.1.18221							0	517.609	1549.8	1549.79	0.0116091	MS-GF+ Beta (v9517)	3	2.05279e-07	GLDVNKC[333]EIAR
0.1.17788							0	707.369	1412.72	1412.71	0.0118296	MS-GF+ Beta (v9517)	2	2.49881e-07	IAVAAQNC[333]YK
0.1.18215							0	704.869	1407.72	1407.72	0.00589386	MS-GF+ Beta (v9517)	2	3.85896e-07	ALANSLAC[333]QGK
0.1.23122							0	795.747	2384.22	2382.23	1.99309	MS-GF+ Beta (v9517)	3	4.77537e-07	IQEKC[333]QLEINFNTLQTK
0.1.22226							0	793.422	1584.83	1584.82	0.00820845	MS-GF+ Beta (v9517)	2	6.05265e-07	AVLFC[333]LSEDKK
0.1.19043							0	546.636	1636.89	1636.89	0.00135601	MS-GF+ Beta (v9517)	3	9.78104e-07	LLVGNKC[333]DLTTK
0.1.16545							0	515.563	1543.67	1543.65	0.0137739	MS-GF+ Beta (v9517)	3	1.03638e-06	SC[57]YDLSC[333]HAR
0.1.19607							0	573.988	1718.94	1718.93	0.0156435	MS-GF+ Beta (v9517)	3	1.6332e-06	ELEKVC[333]NPIITK
0.1.27608							0	916.002	1829.99	1829.97	0.0187207	MS-GF+ Beta (v9517)	2	1.7177e-06	SLHDALC[333]VLAQTVK
0.1.14519							0	687.29	1372.56	1372.56	0.00725013	MS-GF+ Beta (v9517)	2	2.71088e-06	NM[16]M[16]AAC[333]DPR
0.1.15136							0	718.396	1434.78	1434.77	0.0121982	MS-GF+ Beta (v9517)	2	3.07808e-06	TVAKC[333]QVTPR
0.1.27095							0	654.36	1960.06	1960.05	0.0119847	MS-GF+ Beta (v9517)	3	3.17461e-06	AAVEEGIVLGGGC[333]ALLR
0.1.15891							0	689.663	2065.97	2065.95	0.0129979	MS-GF+ Beta (v9517)	3	3.58105e-06	HELQANC[333]YEEVKDR
0.1.25864							0	914.092	2739.25	2737.26	1.99889	MS-GF+ Beta (v9517)	3	3.88695e-06	LVTSPC[333]C[57]IVTSTYGWTANM[16]ER
0.1.19881							0	547.267	1638.78	1638.76	0.0139965	MS-GF+ Beta (v9517)	3	4.51248e-06	NM[16]SVHLSPC[333]FR
0.1.20657							0	973.987	1945.96	1945.95	0.0135133	MS-GF+ Beta (v9517)	2	4.79453e-06	PGHLQEGFGC[333]VVTNR
0.1.17167							0	730.827	1459.64	1459.63	0.00665725	MS-GF+ Beta (v9517)	2	9.19308e-06	SGQGAFGNMC[333]R
0.1.18222							0	470.247	1407.72	1407.72	0.00221847	MS-GF+ Beta (v9517)	3	1.11373e-05	ALANSLAC[333]QGK
0.1.25850							0	1039.16	3114.46	3112.44	2.01245	MS-GF+ Beta (v9517)	3	1.12175e-05	EKLC[333]YVALDFEQEMAMAASSSSLEK
0.1.21351							0	650.843	1299.67	1299.66	0.0059192	MS-GF+ Beta (v9517)	2	1.4472e-05	TYAIC[333]GAIR
0.1.14528							0	743.847	1485.68	1485.67	0.00869617	MS-GF+ Beta (v9517)	2	1.50946e-05	TAGQTGM[16]C[333]GGVR
0.1.16080							0	636.795	1271.58	1271.56	0.012015	MS-GF+ Beta (v9517)	2	1.79307e-05	M[16]LSC[333]AGADR
0.1.17263							0	597.311	1192.61	1192.6	0.00495268	MS-GF+ Beta (v9517)	2	1.86831e-05	VAGINAC[333]GR
0.1.17948							0	508.929	1523.77	1523.76	0.0106077	MS-GF+ Beta (v9517)	3	2.10431e-05	FAC[333]HSASLTVR
0.1.14550							0	630.785	1259.56	1259.55	0.00938782	MS-GF+ Beta (v9517)	2	2.23766e-05	AC[333]VM[16]M[16]QGR
0.1.16557							0	772.84	1543.67	1543.65	0.0107964	MS-GF+ Beta (v9517)	2	2.78619e-05	SC[57]YDLSC[333]HAR
0.1.12910							0	684.343	1366.67	1366.67	0.00595934	MS-GF+ Beta (v9517)	2	3.51201e-05	EALNSC[333]NKR
0.1.15192							0	604.306	1809.9	1809.89	0.00891173	MS-GF+ Beta (v9517)	3	3.78155e-05	M[16]RPGVAC[333]SVSQAQK
0.1.23077							0	803.399	2407.17	2405.18	1.99171	MS-GF+ Beta (v9517)	3	3.87714e-05	KC[333]LELFTELAEDKENYK
0.1.17990							0	762.889	1523.76	1523.76	0.00885099	MS-GF+ Beta (v9517)	2	3.95467e-05	FAC[333]HSASLTVR
0.1.14373							0	397.445	1585.75	1585.74	0.0114185	MS-GF+ Beta (v9517)	4	4.19515e-05	KC[333]YEM[16]ASHLR
0.1.13353							0	600.285	1198.56	1198.55	0.00800762	MS-GF+ Beta (v9517)	2	4.21863e-05	ANAAAM[16]C[333]AK
0.1.26997							0	654.359	1960.06	1960.05	0.0110692	MS-GF+ Beta (v9517)	3	5.15574e-05	AAVEEGIVLGGGC[333]ALLR
0.1.16661							0	585.621	1753.84	1753.83	0.0120083	MS-GF+ Beta (v9517)	3	5.17489e-05	SIKDTIC[333]NQDER
0.1.18340							0	542.29	1623.85	1623.84	0.00467846	MS-GF+ Beta (v9517)	3	5.69014e-05	IKNC[333]LNPQFSK
0.1.16267							0	425.556	1273.65	1273.64	0.00864996	MS-GF+ Beta (v9517)	3	6.5526e-05	ATYDKLC[333]K
0.1.11425							0	413.876	1238.61	1238.6	0.00980847	MS-GF+ Beta (v9517)	3	7.02686e-05	KTPC[333]GEGSK
0.1.18617							0	622.786	1243.56	1243.55	0.00564523	MS-GF+ Beta (v9517)	2	7.74945e-05	AC[333]VMM[16]QGR
0.1.15938							0	690.864	1379.71	1379.71	0.00154382	MS-GF+ Beta (v9517)	2	0.000100062	KC[333]LEEQGLK
0.1.13794							0	749.365	1496.71	1496.7	0.0102315	MS-GF+ Beta (v9517)	2	0.0001043	TGSQGQC[333]TQVR
0.1.16137							0	425.556	1273.65	1273.64	0.00800909	MS-GF+ Beta (v9517)	3	0.000129587	ATYDKLC[333]K
0.1.16466							0	738.829	1475.64	1475.63	0.0147944	MS-GF+ Beta (v9517)	2	0.000157384	SGQGAFGNM[16]C[333]R
0.1.14297							0	663.815	1325.62	1325.61	0.00522596	MS-GF+ Beta (v9517)	2	0.000162833	M[16]LPDKDC[333]R
0.1.19784							0	747.39	1492.77	1490.76	2.01028	MS-GF+ Beta (v9517)	2	0.000169505	ALVDGPC[333]TQVR
0.1.30305							0	723.717	2168.13	2167.13	0.993608	MS-GF+ Beta (v9517)	3	0.000172842	FLSQIESDC[333]LALLQVR
0.1.9755							0	517.601	1549.78	1549.77	0.0133237	MS-GF+ Beta (v9517)	3	0.000184505	KC[333]NTDQAGRPK
0.1.17768							0	674.343	2020.01	2019.99	0.0147372	MS-GF+ Beta (v9517)	3	0.000188988	KPNVGC[333]QQDSEELLK
0.1.17435							0	561.958	1682.85	1682.84	0.0162683	MS-GF+ Beta (v9517)	3	0.000209142	LLLGNKC[333]DM[16]EAK
0.1.20162							0	505.266	1512.78	1512.77	0.011211	MS-GF+ Beta (v9517)	3	0.000220197	VAC[333]IGAWHPAR
0.1.14110							0	529.59	1585.75	1585.74	0.00953973	MS-GF+ Beta (v9517)	3	0.000224586	KC[333]YEM[16]ASHLR
0.1.20049							0	672.342	1342.67	1342.66	0.0110948	MS-GF+ Beta (v9517)	2	0.000228053	SASVAPFTC[333]K
0.1.16436							0	411.228	1230.66	1230.65	0.00926979	MS-GF+ Beta (v9517)	3	0.0002615	IAVHC[333]TVR
0.1.16648							0	641.976	1922.91	1922.89	0.0129525	MS-GF+ Beta (v9517)	3	0.000292637	FNAHGDANTIVC[333]NSK
0.1.16265							0	637.831	1273.65	1273.64	0.00948722	MS-GF+ Beta (v9517)	2	0.000323548	ATYDKLC[333]K
0.1.16723							0	615.278	1228.54	1228.54	0.00526664	MS-GF+ Beta (v9517)	2	0.000331795	PTC[57]PYC[333]R
0.1.17244							0	688.896	1375.78	1375.76	0.0128044	MS-GF+ Beta (v9517)	2	0.000374372	QVLIRPC[333]SK
0.1.29927							0	1180.2	3537.58	3538.57	-0.997446	MS-GF+ Beta (v9517)	3	0.000413099	C[333]PEALFQPCFLGMESC[57]GIHETTFNSIM[16]K
0.1.18217							0	531.607	1591.8	1591.79	0.00672893	MS-GF+ Beta (v9517)	3	0.000498597	ALRPGDPGFC[333]AR
0.1.16689							0	515.563	1543.67	1543.65	0.012309	MS-GF+ Beta (v9517)	3	0.000501829	SC[333]YDLSC[57]HAR
0.1.20068							0	750.85	1499.69	1499.67	0.0127634	MS-GF+ Beta (v9517)	2	0.000508849	M[16]WQSMC[333]PLR
0.1.19491							0	753.878	1505.74	1505.73	0.00672329	MS-GF+ Beta (v9517)	2	0.000511505	AHVVPC[333]FDASK
0.1.20806							0	553.284	1656.83	1656.82	0.0105089	MS-GF+ Beta (v9517)	3	0.000518544	VDVFREDLC[333]TK
0.1.15885							0	569.292	1136.57	1136.56	0.00480316	MS-GF+ Beta (v9517)	2	0.00055305	LSTAC[333]PGR
0.1.17993							0	498.62	1492.84	1492.83	0.00641675	MS-GF+ Beta (v9517)	3	0.000555612	LLIEKC[333]NTVK
0.1.18805							0	622.786	1243.56	1243.55	0.00540108	MS-GF+ Beta (v9517)	2	0.000593778	AC[333]VMM[16]QGR
0.1.19107							0	652.837	1303.66	1303.66	-0.000958317	MS-GF+ Beta (v9517)	2	0.00060644	TAVC[333]DIPPR
0.1.14264							0	549.278	1096.54	1096.53	0.00790505	MS-GF+ Beta (v9517)	2	0.000624898	ATNVC[333]TR
0.1.14401							0	630.785	1259.56	1259.55	0.00938782	MS-GF+ Beta (v9517)	2	0.000669852	AC[333]VM[16]M[16]QGR
0.1.30027							0	1180.2	3537.57	3538.57	-1.00294	MS-GF+ Beta (v9517)	3	0.000680473	C[57]PEALFQPCFLGMESC[333]GIHETTFNSIM[16]K
0.1.17219							0	659.826	1317.64	1318.65	-1.01282	MS-GF+ Beta (v9517)	2	0.000709638	C[333]HTPPLYR
0.1.31686							0	893.93	1785.85	1783.84	2.00299	MS-GF+ Beta (v9517)	2	0.000729096	KGDC[333]RDSWRSNK
0.1.28435							0	626.309	1875.9	1873.91	1.9968	MS-GF+ Beta (v9517)	3	0.000777608	TIQFVDWC[333]PTGFK
0.1.22914							0	1020.16	3057.44	3055.44	2.00145	MS-GF+ Beta (v9517)	3	0.000778859	AYHEQLTVAEITNAC[333]FEPANQM[16]VK
0.1.14190							0	442.879	1325.62	1325.61	0.00533475	MS-GF+ Beta (v9517)	3	0.000779094	M[16]LPDKDC[333]R
0.1.14925							0	706.787	1411.56	1411.55	0.0144233	MS-GF+ Beta (v9517)	2	0.000797052	YDDM[16]AAC[333]M[16]K
0.1.9876							0	585.295	1168.57	1168.57	0.00874541	MS-GF+ Beta (v9517)	2	0.000836683	KNASC[333]GTR
0.1.20129							0	554.982	1661.92	1661.91	0.0169657	MS-GF+ Beta (v9517)	3	0.000839406	VC[333]EEIAIIPSKK
0.1.16929							0	518.567	1552.68	1552.67	0.0138779	MS-GF+ Beta (v9517)	3	0.000848415	YC[333]YYNETHK
0.1.17784							0	1011.01	2020.01	2019.99	0.0145674	MS-GF+ Beta (v9517)	2	0.000851471	KPNVGC[333]QQDSEELLK
0.1.11435							0	620.307	1238.6	1238.6	0.00252805	MS-GF+ Beta (v9517)	2	0.00089283	KTPC[333]GEGSK
0.1.27880							0	755.697	2264.07	2263.07	0.996425	MS-GF+ Beta (v9517)	3	0.000931094	C[333]LELFSELAEDKENYK
0.1.14341							0	529.59	1585.75	1585.74	0.0110046	MS-GF+ Beta (v9517)	3	0.000937014	KC[333]YEM[16]ASHLR
0.1.21731							0	734.39	1466.77	1466.76	0.00650537	MS-GF+ Beta (v9517)	2	0.000971101	ATVFLNPAAC[333]K
0.1.16812							0	585.622	1753.84	1753.83	0.0142056	MS-GF+ Beta (v9517)	3	0.000983121	SIKDTIC[333]NQDER
0.1.13700							0	591.796	1181.58	1180.57	1.01241	MS-GF+ Beta (v9517)	2	0.0010311	AVAAGNSC[333]R
0.1.17288							0	459.598	1375.77	1375.76	0.00888486	MS-GF+ Beta (v9517)	3	0.0010322	QVLIRPC[333]SK
0.1.14942							0	729.872	1457.73	1457.72	0.00709242	MS-GF+ Beta (v9517)	2	0.00106371	EKPVC[333]GTTYK
0.1.19277							0	605.312	1812.91	1812.91	0.00595844	MS-GF+ Beta (v9517)	3	0.00107161	KLENC[333]NYAVELGK
0.1.19239							0	561.304	1680.89	1681.88	-0.987576	MS-GF+ Beta (v9517)	3	0.00107885	IM[16]EKC[333]TLPLTGK
0.1.21366							0	545.961	1634.86	1634.85	0.0164624	MS-GF+ Beta (v9517)	3	0.00107936	NTGIIC[333]TIGPASR
0.1.17938							0	625.83	1249.64	1249.64	0.00680167	MS-GF+ Beta (v9517)	2	0.00116483	LSQEC[333]PIK
0.1.16323							0	671.351	1340.69	1340.68	0.0119602	MS-GF+ Beta (v9517)	2	0.00123726	ISIC[333]SSDKR
0.1.22186							0	872.458	1742.9	1742.89	0.00661828	MS-GF+ Beta (v9517)	2	0.00124755	LLEKC[333]AM[16]TALSSK
0.1.13045							0	684.343	1366.67	1366.67	0.00437242	MS-GF+ Beta (v9517)	2	0.00129377	EALNSC[333]NKR
0.1.14053							0	522.75	1043.49	1043.48	0.00814823	MS-GF+ Beta (v9517)	2	0.00130466	M[16]VGC[333]TGK
0.1.14078							0	618.777	1235.54	1235.53	0.00775669	MS-GF+ Beta (v9517)	2	0.0013054	AYGGSM[16]C[333]AK
0.1.15959							0	514.751	1027.49	1027.48	0.00452771	MS-GF+ Beta (v9517)	2	0.00131296	MVGC[333]TGK
0.1.11422							0	563.276	1124.54	1124.53	0.00822968	MS-GF+ Beta (v9517)	2	0.00132721	VNNSC[333]QK
0.1.14148							0	476.241	1425.7	1425.69	0.00945408	MS-GF+ Beta (v9517)	3	0.00135652	KC[333]GIQDTNSK
0.1.12815							0	691.345	1380.68	1380.67	0.00520477	MS-GF+ Beta (v9517)	2	0.00139502	NIEKEC[333]NAK
0.1.26860							0	953.447	2857.32	2855.31	2.01244	MS-GF+ Beta (v9517)	3	0.00143148	LC[333]YVALDFEQEMAMAASSSSLEK
0.1.22971							0	765.367	3057.44	3055.44	1.99766	MS-GF+ Beta (v9517)	4	0.0016004	AYHEQLTVAEITNAC[333]FEPANQM[16]VK
0.1.18887							0	548.3	1094.59	1094.58	0.00645108	MS-GF+ Beta (v9517)	2	0.00162545	LNVC[333]VSK
0.1.19735							0	754.893	1507.77	1506.76	1.00938	MS-GF+ Beta (v9517)	2	0.00169062	NNTQVLINC[333]R
0.1.11953							0	521.245	1040.48	1040.47	0.00519769	MS-GF+ Beta (v9517)	2	0.00176989	NASC[333]GTR
0.1.16148							0	631.809	1261.6	1261.59	0.0115793	MS-GF+ Beta (v9517)	2	0.00210045	WC[333]NEHLK
0.1.16610							0	525.281	1048.55	1048.54	0.0107182	MS-GF+ Beta (v9517)	2	0.00216761	APQC[333]LGK
0.1.19476							0	652.34	1302.67	1303.66	-0.994489	MS-GF+ Beta (v9517)	2	0.00220246	TAVC[333]DIPPR
0.1.14723							0	645.804	1289.59	1289.58	0.0124894	MS-GF+ Beta (v9517)	2	0.00257094	DKMC[333]SM[16]VK
0.1.5488							0	669.849	1337.68	1337.68	0.00796375	MS-GF+ Beta (v9517)	2	0.00280588	QLC[333]TERQK
0.1.19602							0	502.925	1505.75	1506.76	-1.00949	MS-GF+ Beta (v9517)	3	0.00288816	NNTQVLINC[333]R
0.1.16452							0	853.342	1704.67	1702.67	1.99961	MS-GF+ Beta (v9517)	2	0.003367	LCC[333]C[57]PRC[57]CCPR
0.1.18194							0	605.815	1209.62	1209.61	0.00929321	MS-GF+ Beta (v9517)	2	0.00348104	GC[333]EVVVSGK
0.1.27327							0	953.448	2857.32	2855.31	2.01665	MS-GF+ Beta (v9517)	3	0.00348349	LC[333]YVALDFEQEMAMAASSSSLEK
0.1.16382							0	547.294	1092.57	1092.56	0.00891755	MS-GF+ Beta (v9517)	2	0.00355256	TIAPC[333]QK
0.1.9965							0	549.776	1097.54	1097.53	0.00960432	MS-GF+ Beta (v9517)	2	0.00392512	KC[333]SASNR
0.1.15996							0	565.967	1694.88	1694.87	0.0116294	MS-GF+ Beta (v9517)	3	0.00403413	KDEQERC[333]ITIK
0.1.17818							0	570.629	1708.87	1708.85	0.0131305	MS-GF+ Beta (v9517)	3	0.00450132	IC[57]TLPEKC[333]AVDK
0.1.23853							0	764.074	2289.2	2290.18	-0.981913	MS-GF+ Beta (v9517)	3	0.00492914	KPQVNKRPVLWC[333]SSC[57]R
0.1.16194							0	671.351	1340.69	1340.68	0.0114719	MS-GF+ Beta (v9517)	2	0.00494593	ISIC[333]SSDKR
0.1.20374							0	419.576	1255.71	1255.7	0.00641068	MS-GF+ Beta (v9517)	3	0.00518974	AVLC[333]PPPVK
0.1.19034							0	768.372	1534.73	1534.73	0.00208047	MS-GF+ Beta (v9517)	2	0.00590039	HC[333]NM[16]VLENVK
0.1.14400							0	522.75	1043.49	1043.47	0.0105425	MS-GF+ Beta (v9517)	2	0.00596272	YSPNC[333]K
0.1.14542							0	522.748	1043.48	1043.47	0.00700246	MS-GF+ Beta (v9517)	2	0.00650953	YSPNC[333]K
0.1.18049							0	500.241	1497.7	1497.69	0.0117844	MS-GF+ Beta (v9517)	3	0.00657767	MM[16]IPDC[333]QRR
0.1.14511							0	585.779	1169.54	1169.53	0.0107501	MS-GF+ Beta (v9517)	2	0.00673622	NM[16]AC[333]VQR
0.1.16138							0	421.54	1261.6	1261.59	0.00805645	MS-GF+ Beta (v9517)	3	0.00681803	WC[333]NEHLK
0.1.16465							0	577.781	1153.55	1153.54	0.0094489	MS-GF+ Beta (v9517)	2	0.00720289	NMAC[333]VQR
0.1.17392							0	554.302	1106.59	1106.58	0.00962491	MS-GF+ Beta (v9517)	2	0.00740078	QPISC[333]VK
0.1.16134							0	637.829	1273.64	1273.64	0.00631339	MS-GF+ Beta (v9517)	2	0.00806528	ATYDKLC[333]K
0.1.27267							0	1429.66	2857.31	2855.31	2.00726	MS-GF+ Beta (v9517)	2	0.0082153	LC[333]YVALDFEQEMAMAASSSSLEK
0.1.16309							0	768.376	1534.74	1534.73	0.0102592	MS-GF+ Beta (v9517)	2	0.00858548	HC[333]NM[16]VLENVK
0.1.9821							0	549.777	1097.54	1097.53	0.0114354	MS-GF+ Beta (v9517)	2	0.00866803	KC[333]SASNR
0.1.14470							0	601.299	1800.88	1800.86	0.0187261	MS-GF+ Beta (v9517)	3	0.00936281	ELC[333]HTQSSHASLR
0.1.16739							0	684.357	1366.7	1366.69	0.00815097	MS-GF+ Beta (v9517)	2	0.00976678	INQLC[333]SQTK
0.1.16622							0	622.786	1243.56	1243.55	0.00588937	MS-GF+ Beta (v9517)	2	0.00979735	AC[333]VM[16]MQGR
0.1.20428							0	678.338	1354.66	1353.65	1.01233	MS-GF+ Beta (v9517)	2	0.0112742	IGNC[333]PFSQR
0.1.14370							0	610.782	1219.55	1219.54	0.012559	MS-GF+ Beta (v9517)	2	0.0113508	AYGGSMC[333]AK
0.1.29120							0	815.75	2444.23	2443.21	1.01878	MS-GF+ Beta (v9517)	3	0.0113794	KPVTDC[333]VISVPSFFTDAER
0.1.17268							0	643.34	1284.66	1284.65	0.011203	MS-GF+ Beta (v9517)	2	0.0114716	AKFENLC[333]K
0.1.18855							0	557.792	1113.57	1113.56	0.00626387	MS-GF+ Beta (v9517)	2	0.0116971	YC[333]QVIR
0.1.17061							0	602.305	1202.6	1202.59	0.00863985	MS-GF+ Beta (v9517)	2	0.0117067	HC[333]DLQVR
0.1.9905							0	366.853	1097.54	1097.53	0.00806515	MS-GF+ Beta (v9517)	3	0.0122843	KC[333]SASNR
0.1.20433							0	607.568	2426.24	2425.23	1.01265	MS-GF+ Beta (v9517)	4	0.0128399	KQLEEAFKQQAATEC[333]QLK
0.1.16263							0	521.749	1041.48	1041.47	0.0089028	MS-GF+ Beta (v9517)	2	0.0131527	TLC[333]GC[57]R
0.1.17431							0	643.338	1284.66	1284.65	0.00693054	MS-GF+ Beta (v9517)	2	0.0134617	AKFENLC[333]K
0.1.31837							0	929.44	1856.87	1855.85	1.01636	MS-GF+ Beta (v9517)	2	0.0138577	CC[333]C[333]C[333]IKGK
0.1.23197							0	671.673	2012	2011.98	0.0178585	MS-GF+ Beta (v9517)	3	0.0139282	KDC[333]EVVM[16]M[16]IGLPGAGK
0.1.15814							0	648.317	1294.62	1294.62	-0.00269061	MS-GF+ Beta (v9517)	2	0.016184	SLSGSSPC[333]PK
0.1.20674							0	607.57	2426.25	2425.23	1.02169	MS-GF+ Beta (v9517)	4	0.0166389	KQLEEAFKQQAATEC[333]QLK
0.1.14170							0	469.235	936.456	936.449	0.00700395	MS-GF+ Beta (v9517)	2	0.0169668	TGAPC[333]R
0.1.14038							0	469.236	936.458	936.449	0.00932329	MS-GF+ Beta (v9517)	2	0.0173046	TGAPC[333]R
0.1.12906							0	456.565	1366.67	1366.67	0.00625123	MS-GF+ Beta (v9517)	3	0.0174388	EALNSC[333]NKR
0.1.17780							0	757.025	2268.05	2268.04	0.0158355	MS-GF+ Beta (v9517)	3	0.017632	TYPGVMHSSC[333]PQEMAAVK
0.1.32222							0	892.422	1782.83	1783.84	-1.01288	MS-GF+ Beta (v9517)	2	0.0177699	KGDC[333]RDSWRSNK
0.1.19192							0	660.837	1319.66	1317.66	2.00262	MS-GF+ Beta (v9517)	2	0.0184428	C[333]SCPLLPPR
0.1.19283							0	907.462	1812.91	1812.91	0.00121098	MS-GF+ Beta (v9517)	2	0.0185144	KLENC[333]NYAVELGK
0.1.9361							0	509.273	1016.53	1016.52	0.00970839	MS-GF+ Beta (v9517)	2	0.0185996	LVGHC[333]R
0.1.32455							0	931.44	1860.87	1858.87	1.99075	MS-GF+ Beta (v9517)	2	0.0199666	WC[333]DC[333]KLPNSK
0.1.7993							0	403.547	1207.62	1207.61	0.00578032	TagRecon 1.4.47	3	0.0183044	RC[333]TKPDR
0.1.9113							0	598.825	1195.64	1195.63	0.00816281	TagRecon 1.4.47	2	0.0135961	IKC[333]DKEK
0.1.9755							0	517.601	1549.78	1549.77	0.0133032	TagRecon 1.4.47	3	0.00220422	KC[333]NTDQAGRPK
0.1.13353							0	600.285	1198.56	1198.55	0.00812289	TagRecon 1.4.47	2	0.0167369	ANAAAM[16]C[333]AK
0.1.13794							0	749.365	1496.71	1496.7	0.010263	TagRecon 1.4.47	2	0.0107921	TGSQGQC[333]TQVR
0.1.13984							0	689.334	2064.98	2064.97	0.0116494	TagRecon 1.4.47	3	0.00158124	ATC[333]APQHGAPGPGPADASK
0.1.14121							0	689.334	2064.98	2064.97	0.0123196	TagRecon 1.4.47	3	0.000960974	ATC[333]APQHGAPGPGPADASK
0.1.14341							0	529.59	1585.75	1585.74	0.0110265	TagRecon 1.4.47	3	0.0173325	KC[333]YEM[16]ASHLR
0.1.14363							0	532.244	2124.95	2124.93	0.0164195	TagRecon 1.4.47	4	0.0126634	EQC[333]C[57]YNC[57]GKPGHLAR
0.1.14373							0	397.445	1585.75	1585.74	0.0114698	TagRecon 1.4.47	4	0.0134702	KC[333]YEM[16]ASHLR
0.1.14436							0	937.493	1872.97	1872.99	-0.0132366	TagRecon 1.4.47	2	0.0110718	KFIAYC[333]RVKCGPR
0.1.15123							0	479.263	1434.77	1434.77	0.00233471	TagRecon 1.4.47	3	0.00206722	TVAKC[333]QVTPR
0.1.15136							0	718.396	1434.78	1434.77	0.0122367	TagRecon 1.4.47	2	0.0039947	TVAKC[333]QVTPR
0.1.15192							0	604.306	1809.9	1809.89	0.0089903	TagRecon 1.4.47	3	0.00504088	M[16]RPGVAC[333]SVSQAQK
0.1.15712							0	423.549	1267.63	1267.62	0.00226404	TagRecon 1.4.47	3	0.00387191	DRC[333]TLAEK
0.1.15803							0	689.663	2065.97	2065.95	0.0139012	TagRecon 1.4.47	3	0.00194361	HELQANC[333]YEEVKDR
0.1.15891							0	689.663	2065.97	2065.95	0.0130692	TagRecon 1.4.47	3	0.00213921	HELQANC[333]YEEVKDR
0.1.15938							0	690.864	1379.71	1379.71	0.00164029	TagRecon 1.4.47	2	0.0108931	KC[333]LEEQGLK
0.1.16137							0	425.556	1273.65	1273.64	0.00801757	TagRecon 1.4.47	3	0.00510482	ATYDKLC[333]K
0.1.16159							0	461.236	1380.69	1380.68	0.00501367	TagRecon 1.4.47	3	0.0040771	LRC[333]DSADLR
0.1.16195							0	512.587	1534.74	1534.73	0.013009	TagRecon 1.4.47	3	0.0112441	HC[333]NM[16]VLENVK
0.1.16265							0	637.831	1273.65	1273.64	0.00947357	TagRecon 1.4.47	2	0.0141961	ATYDKLC[333]K
0.1.16267							0	425.556	1273.65	1273.64	0.00870489	TagRecon 1.4.47	3	0.00512225	ATYDKLC[333]K
0.1.16309							0	768.376	1534.74	1534.73	0.010277	TagRecon 1.4.47	2	0.0105928	HC[333]NM[16]VLENVK
0.1.16322							0	512.588	1534.74	1534.73	0.0136214	TagRecon 1.4.47	3	0.00525629	HC[333]NM[16]VLENVK
0.1.16455							0	662.357	1322.7	1322.69	0.0100035	TagRecon 1.4.47	2	0.0108458	KC[333]LEELQK
0.1.16466							0	738.829	1475.64	1475.63	0.0148803	TagRecon 1.4.47	2	0.010926	SGQGAFGNM[16]C[333]R
0.1.16666							0	877.923	1753.83	1753.83	0.00125989	TagRecon 1.4.47	2	0.00927163	SIKDTIC[333]NQDER
0.1.16689							0	515.563	1543.67	1543.65	0.012335	TagRecon 1.4.47	3	0.0161905	SC[333]YDLSC[57]HAR
0.1.16828							0	877.927	1753.84	1753.83	0.00938954	TagRecon 1.4.47	2	0.0038591	SIKDTIC[333]NQDER
0.1.17005							0	693.085	2768.31	2768.29	0.0225274	TagRecon 1.4.47	4	0.00591411	HELQANC[57]YEEVKDRC[333]TLAEK
0.1.17028							0	923.776	2768.3	2768.29	0.0152069	TagRecon 1.4.47	3	0.00052914	HELQANC[57]YEEVKDRC[333]TLAEK
0.1.17133							0	693.083	2768.3	2768.29	0.011974	TagRecon 1.4.47	4	0.00418178	HELQANC[57]YEEVKDRC[333]TLAEK
0.1.17156							0	923.774	2768.3	2768.29	0.0102379	TagRecon 1.4.47	3	0.000466022	HELQANC[57]YEEVKDRC[333]TLAEK
0.1.17167							0	730.827	1459.64	1459.63	0.00672271	TagRecon 1.4.47	2	0.0107744	SGQGAFGNMC[333]R
0.1.17244							0	688.896	1375.78	1375.76	0.0128696	TagRecon 1.4.47	2	0.0164632	QVLIRPC[333]SK
0.1.17584							0	558.277	1671.81	1671.79	0.0173816	TagRecon 1.4.47	3	0.00525405	YLAEVAC[333]GDDRK
0.1.17587							0	836.91	1671.81	1671.79	0.0125923	TagRecon 1.4.47	2	0.0102627	YLAEVAC[333]GDDRK
0.1.17645							0	645.557	2578.2	2578.18	0.0179633	TagRecon 1.4.47	4	0.00852513	QM[16]EKDETVSDC[333]SPHIANIGR
0.1.17651							0	860.405	2578.19	2578.18	0.0147845	TagRecon 1.4.47	3	0.00175051	QM[16]EKDETVSDC[333]SPHIANIGR
0.1.17768							0	674.343	2020.01	2019.99	0.014789	TagRecon 1.4.47	3	0.00172581	KPNVGC[333]QQDSEELLK
0.1.17784							0	1011.01	2020.01	2019.99	0.0145568	TagRecon 1.4.47	2	0.0102357	KPNVGC[333]QQDSEELLK
0.1.17788							0	707.369	1412.72	1412.71	0.0118362	TagRecon 1.4.47	2	0.0106407	IAVAAQNC[333]YK
0.1.17883							0	670.677	2009.01	2008.99	0.0169234	TagRecon 1.4.47	3	0.00188173	NYLEPGKEC[333]VQPATK
0.1.18194							0	605.815	1209.62	1209.61	0.00936409	TagRecon 1.4.47	2	0.0112995	GC[333]EVVVSGK
0.1.18215							0	704.869	1407.72	1407.72	0.00598375	TagRecon 1.4.47	2	0.0103856	ALANSLAC[333]QGK
0.1.18221							0	517.609	1549.8	1549.79	0.0115873	TagRecon 1.4.47	3	0.00484636	GLDVNKC[333]EIAR
0.1.18378							0	920.461	1838.91	1838.9	0.00801227	TagRecon 1.4.47	2	0.0103697	YSNSALGHVNC[333]TIK
0.1.18411							0	700.367	2098.08	2098.06	0.0154412	TagRecon 1.4.47	3	0.00140639	EIVHLQAGQC[333]GNQIGAK
0.1.18437							0	613.978	1838.91	1838.9	0.014804	TagRecon 1.4.47	3	0.00191661	YSNSALGHVNC[333]TIK
0.1.18531							0	700.366	2098.08	2098.06	0.0137413	TagRecon 1.4.47	3	0.00145638	EIVHLQAGQC[333]GNQIGAK
0.1.18683							0	681.338	2040.99	2040.99	0.0054222	TagRecon 1.4.47	3	0.00191933	LM[16]DQNLKC[333]LSAAEEK
0.1.18839							0	762.88	1523.75	1523.74	0.00543233	TagRecon 1.4.47	2	0.0162894	VIGSGC[333]NLDSAR
0.1.18872							0	787.906	1573.8	1573.79	0.00577521	TagRecon 1.4.47	2	0.0105287	AAAPAPVSEAVC[333]R
0.1.19043							0	546.636	1636.89	1636.89	0.00144118	TagRecon 1.4.47	3	0.00192055	LLVGNKC[333]DLTTK
0.1.19068							0	819.452	1636.89	1636.89	0.00377828	TagRecon 1.4.47	2	0.0111323	LLVGNKC[333]DLTTK
0.1.19107							0	652.837	1303.66	1303.66	-0.000946417	TagRecon 1.4.47	2	0.0164472	TAVC[333]DIPPR
0.1.19160							0	801.915	1601.82	1601.81	0.00302349	TagRecon 1.4.47	2	0.0107723	IIYGGSVTGATC[333]K
0.1.19277							0	605.312	1812.91	1812.91	0.00592526	TagRecon 1.4.47	3	0.00216019	KLENC[333]NYAVELGK
0.1.19472							0	502.922	1505.74	1505.73	0.00917672	TagRecon 1.4.47	3	0.00365302	AHVVPC[333]FDASK
0.1.19602							0	502.925	1505.75	1505.73	0.018188	TagRecon 1.4.47	3	0.0180974	AHVVPC[333]FDASK
0.1.19605							0	754.397	1506.78	1506.76	0.0183375	TagRecon 1.4.47	2	0.00928827	NNTQVLINC[333]R
0.1.19628							0	503.268	1506.78	1506.76	0.0210392	TagRecon 1.4.47	3	0.00498683	NNTQVLINC[333]R
0.1.19793							0	505.931	1514.77	1514.76	0.0169668	TagRecon 1.4.47	3	0.00449805	KETGAASFLC[333]R
0.1.19817							0	670.969	2009.88	2009.87	0.0158743	TagRecon 1.4.47	3	0.00523795	C[57]C[57]LTYC[333]FNKPEDK
0.1.19855							0	722.374	2164.1	2164.07	0.0284059	TagRecon 1.4.47	3	0.00182018	KLEEEQIILEDQNC[333]K
0.1.19874							0	755.629	3018.49	3018.45	0.0361512	TagRecon 1.4.47	4	0.00456677	TNHIGHTGYLNTVTVSPDGSLC[333]ASGGK
0.1.20129							0	554.982	1661.92	1661.91	0.0170603	TagRecon 1.4.47	3	0.0023203	VC[333]EEIAIIPSKK
0.1.20229							0	793.908	1585.8	1585.79	0.00934911	TagRecon 1.4.47	2	0.0110664	FIC[333]TTSAIQNR
0.1.21228							0	634.333	1266.65	1266.65	0.00450672	TagRecon 1.4.47	2	0.0142373	AC[333]NC[57]LLLK
0.1.21289							0	1055.54	2109.07	2109.06	0.00860363	TagRecon 1.4.47	2	0.00317865	IISNASC[333]TTNC[57]LAPLAK
0.1.21309							0	704.032	2109.07	2109.06	0.0136219	TagRecon 1.4.47	3	0.00198696	IISNASC[333]TTNC[57]LAPLAK
0.1.21341							0	818.433	1634.85	1634.85	0.00595963	TagRecon 1.4.47	2	0.00970619	NTGIIC[333]TIGPASR
0.1.21351							0	650.843	1299.67	1299.66	0.00591944	TagRecon 1.4.47	2	0.0130936	TYAIC[333]GAIR
0.1.21388							0	1055.54	2109.07	2109.06	0.0108936	TagRecon 1.4.47	2	0.00320962	IISNASC[333]TTNC[57]LAPLAK
0.1.21765							0	955.487	1908.96	1908.96	-0.00274353	TagRecon 1.4.47	2	0.00393292	VNQIGSVTESLQAC[333]K
0.1.21767							0	637.332	1908.97	1908.96	0.0121905	TagRecon 1.4.47	3	0.00191239	VNQIGSVTESLQAC[333]K
0.1.22226							0	793.422	1584.83	1584.82	0.00820996	TagRecon 1.4.47	2	0.0110918	AVLFC[333]LSEDKK
0.1.22727							0	704.029	2109.07	2109.06	0.00605432	TagRecon 1.4.47	3	0.012414	IISNASC[57]TTNC[333]LAPLAK
0.1.24147							0	822.651	3286.57	3286.53	0.039555	TagRecon 1.4.47	4	0.00925978	SGDAAIVDM[16]VPGKPMC[333]VESFSDYPPLGR
0.1.25901							0	1101.86	3302.56	3302.53	0.0254716	TagRecon 1.4.47	3	0.00160066	SGDAAIVDM[16]VPGKPM[16]C[333]VESFSDYPPLGR
0.1.25996							0	731.877	2923.48	2923.45	0.0313493	TagRecon 1.4.47	4	0.0131808	AELAESKC[333]SELEEELKNVTNNLK
0.1.26307							0	731.878	2923.48	2923.45	0.0361339	TagRecon 1.4.47	4	0.0112322	AELAESKC[333]SELEEELKNVTNNLK
0.1.26997							0	654.359	1960.06	1960.05	0.0111055	TagRecon 1.4.47	3	0.00342279	AAVEEGIVLGGGC[333]ALLR
0.1.27095							0	654.36	1960.06	1960.05	0.0120967	TagRecon 1.4.47	3	0.00215892	AAVEEGIVLGGGC[333]ALLR
0.1.27138							0	611.004	1829.99	1829.97	0.0200245	TagRecon 1.4.47	3	0.00159518	SLHDALC[333]VLAQTVK
0.1.27608							0	916.002	1829.99	1829.97	0.0188116	TagRecon 1.4.47	2	0.00551127	SLHDALC[333]VLAQTVK
0.1.27614							0	611.005	1829.99	1829.97	0.0207895	TagRecon 1.4.47	3	0.00149377	SLHDALC[333]VLAQTVK
0.1.28543							0	765.657	3058.6	3058.56	0.0333198	TagRecon 1.4.47	4	0.00931621	KDGNASGTTLLEALDC[333]ILPPTRPTDK
0.1.29332							0	882.453	2644.34	2644.31	0.0237966	TagRecon 1.4.47	3	0.00655784	NVC[333]LPPEM[16]EVALTEDQVPALK
0.1.29715							0	825.191	3296.73	3296.71	0.0270663	TagRecon 1.4.47	4	0.00850295	DGNASGTTLLEALDC[333]ILPPTRPTDKPLR
0.1.29791							0	1099.92	3296.73	3296.71	0.0206667	TagRecon 1.4.47	3	0.00122252	DGNASGTTLLEALDC[333]ILPPTRPTDKPLR
0.1.29819							0	825.191	3296.73	3296.71	0.0272922	TagRecon 1.4.47	4	0.00810916	DGNASGTTLLEALDC[333]ILPPTRPTDKPLR
0.1.31115							0	848.468	2542.38	2542.36	0.0205242	TagRecon 1.4.47	3	0.00156004	GLIAAIC[333]AGPTALLAHEIGFGSK

## Sheet: Peptide View
Sequence	Filtered Spectra	Monoisotopic Mass	Molecular Weight	Protein Accessions
LC[333]YVALDFEQEMAMAASSSSLEK (+3)	7	2855.31	2523.85	XP_933678.1|
HC[333]NM[16]VLENVK (+2)	5	1534.73	1535.57	NP_004588.1|,NP_808210.2|
EALNSC[333]NKR (+2)	4	1366.67	1034.15	NP_005372.2|
TGAPC[333]R (+2)	4	936.449	603.692	NP_001967.3|,NP_443739.3|,NP_001180432.1|,NP_001966.1|,NP_001419.1|,NP_001188412.1|
ATC[333]APQHGAPGPGPADASK (+3)	4	2064.97	2066.04	NP_001447.2|,NP_001104026.1|
KC[333]YEM[16]ASHLR (+3)	4	1585.74	1586.62	NP_005013.1|
ATYDKLC[333]K (+3)	4	1273.64	1274.27	NP_001019.1|
HC[333]NM[16]VLENVK (+3)	4	1534.73	1535.57	NP_004588.1|,NP_808210.2|
SIKDTIC[333]NQDER (+3)	4	1753.83	1421.53	NP_055140.1|
SIKDTIC[333]NQDER (+2)	4	1753.83	1754.7	NP_055140.1|
HELQANC[57]YEEVKDRC[333]TLAEK (+4)	4	2768.29	2769.82	NP_005498.1|
YSNSALGHVNC[333]TIK (+3)	4	1838.9	1839.85	NP_065393.1|,NP_997403.1|,NP_997404.1|,NP_722550.1|,NP_008939.1|
EIVHLQAGQC[333]GNQIGAK (+3)	4	2098.06	2099.16	NP_006078.2|,NP_006079.1|
AELAESKC[333]SELEEELKNVTNNLK (+4)	4	2923.45	2925.01	NP_689476.2|,NP_001036816.1|,NP_001036818.1|
SLHDALC[333]VLAQTVK (+3)	4	1829.97	1830.93	NP_001185771.1|,NP_006422.1|
DGNASGTTLLEALDC[333]ILPPTRPTDKPLR (+4)	4	3296.71	3298.51	NP_001393.1|
IQEKC[333]QLEINFNTLQTK (+3)	4	2382.23	2050.34	NP_001095.1|,NP_001245300.1|
AC[333]VMM[16]QGR (+2)	4	1243.55	895.125	NP_000261.2|
AC[333]VM[16]M[16]QGR (+2)	4	1259.55	895.125	NP_000261.2|
YSPNC[333]K (+2)	4	1043.47	710.799	NP_005557.1|,NP_001158886.1|,NP_001158887.1|,NP_001158888.1|
KC[333]GIQDTNSK (+3)	3	1425.69	1093.21	NP_054862.1|,NP_001254635.1|
TVAKC[333]QVTPR (+3)	3	1434.77	1435.48	NP_001193496.1|,NP_005522.2|
HELQANC[333]YEEVKDR (+3)	3	2065.95	2067.03	NP_005498.1|
ATYDKLC[333]K (+2)	3	1273.64	1274.27	NP_001019.1|
HELQANC[57]YEEVKDRC[333]TLAEK (+3)	3	2768.29	2769.82	NP_005498.1|
QVLIRPC[333]SK (+3)	3	1375.76	1043.28	NP_001010.2|,NP_001025180.1|
LM[16]DQNLKC[333]LSAAEEK (+3)	3	2040.99	2042.12	NP_705935.1|,NP_001036817.1|
AHVVPC[333]FDASK (+3)	3	1505.73	1506.51	NP_001447.2|,NP_001104026.1|
NNTQVLINC[333]R (+2)	3	1506.76	1507.5	NP_004588.1|,NP_808210.2|
NNTQVLINC[333]R (+3)	3	1506.76	1507.5	NP_004588.1|,NP_808210.2|
IISNASC[333]TTNC[57]LAPLAK (+2)	3	2109.06	2110.21	NP_002037.2|,NP_001243728.1|
SLHDALC[333]VLAQTVK (+2)	3	1829.97	1830.93	NP_001185771.1|,NP_006422.1|
NYLEPGKEC[333]VQPATK (+3)	3	2008.99	2010.06	NP_733765.1|
PGHLQEGFGC[333]VVTNR (+3)	3	1945.95	1613.8	NP_001018077.1|,NP_001018078.1|,NP_056455.3|,NP_001018079.1|
KDC[333]EVVM[16]M[16]IGLPGAGK (+3)	3	2011.98	1648.02	NP_004492.2|,NP_114032.2|
FNAHGDANTIVC[333]NSK (+3)	3	1922.89	1590.72	NP_002296.1|
KC[333]YEM[16]ASHLR (+4)	3	1585.74	1586.62	NP_005013.1|
MM[16]IPDC[333]QRR (+3)	3	1497.69	1149.41	NP_004598.1|
SGQGAFGNM[16]C[333]R (+2)	3	1475.63	1476.42	NP_000959.2|
ISIC[333]SSDKR (+2)	3	1340.68	1008.15	NP_004955.2|
AVLC[333]PPPVK (+3)	3	1255.7	923.174	NP_008839.2|,NP_061485.1|,NP_005043.1|
KC[333]SASNR (+2)	3	1097.53	764.851	NP_001015.1|
C[333]PEALFQPCFLGMESC[57]GIHETTFNSIM[16]K (+3)	3	3538.57	3134.65	NP_001077007.1|,NP_001093241.1|,XP_003846703.1|,XP_933678.1|,XP_934799.2|
KQLEEAFKQQAATEC[333]QLK (+4)	3	2425.23	2093.36	XXX_NP_659415.1|
RC[333]TKPDR (+3)	2	1207.61	1208.18	NP_055117.1|,NP_001012474.1|
IKC[333]DKEK (+2)	2	1195.63	1196.2	NP_003290.1|
KC[333]NTDQAGRPK (+3)	2	1549.77	1550.52	NP_006730.2|
KNASC[333]GTR (+2)	2	1168.57	835.929	NP_006799.1|
ANAAAM[16]C[333]AK (+2)	2	1198.55	1199.18	NP_115571.1|,NP_620305.1|
TGSQGQC[333]TQVR (+2)	2	1496.7	1497.42	NP_001022.1|
ELC[333]HTQSSHASLR (+3)	2	1800.86	1468.59	NP_004578.2|,NP_001036041.1|
TVAKC[333]QVTPR (+2)	2	1434.77	1435.48	NP_001193496.1|,NP_005522.2|
DRC[333]TLAEK (+3)	2	1267.62	1268.23	NP_005498.1|
KC[333]LEELQK (+2)	2	1322.69	1323.34	NP_002785.1|,NP_001186708.1|,NP_001186709.1|
FNAHGDANTIVC[333]NSK (+2)	2	1922.89	1590.72	NP_002296.1|
SC[333]YDLSC[57]HAR (+3)	2	1543.65	1544.47	NP_002038.2|
HELQANC[57]YEEVKDRC[333]TLAEK (+5)	2	2768.29	2379.63	NP_005498.1|
SGQGAFGNMC[333]R (+2)	2	1459.63	1460.42	NP_000959.2|
YLAEVAC[333]GDDRK (+2)	2	1671.79	1672.64	NP_006817.1|
QM[16]EKDETVSDC[333]SPHIANIGR (+4)	2	2578.18	2579.6	NP_004921.1|,NP_001193469.1|
QM[16]EKDETVSDC[333]SPHIANIGR (+3)	2	2578.18	2579.6	NP_004921.1|,NP_001193469.1|
KPNVGC[333]QQDSEELLK (+3)	2	2019.99	2021.04	NP_060697.4|
KPNVGC[333]QQDSEELLK (+2)	2	2019.99	2021.04	NP_060697.4|
IAVAAQNC[333]YK (+2)	2	1412.71	1413.43	NP_000356.1|,NP_001152759.1|
LLIEKC[333]NTVK (+3)	2	1492.83	1160.43	NP_005780.2|,NP_001253974.1|
GC[333]EVVVSGK (+2)	2	1209.61	1210.19	NP_001247435.1|,NP_001247436.1|,NP_000996.2|,NP_001243731.1|
ALANSLAC[333]QGK (+2)	2	1407.72	1408.41	NP_001230106.1|,NP_000025.1|,NP_908930.1|,NP_908932.1|,NP_001121089.1|
ALRPGDPGFC[333]AR (+3)	2	1591.79	1259.44	NP_060439.2|
YSNSALGHVNC[333]TIK (+2)	2	1838.9	1839.85	NP_065393.1|,NP_997403.1|,NP_997404.1|,NP_722550.1|,NP_008939.1|
GLDVNKC[333]EIAR (+3)	2	1549.79	1550.56	NP_055140.1|
VIGSGC[333]NLDSAR (+2)	2	1523.74	1524.48	NP_005557.1|,NP_001128711.1|,NP_002292.1|,NP_059144.1|,NP_001158886.1|,NP_001158887.1|,NP_001158888.1|,NP_659409.2|,NP_001137543.1|,NP_002291.1|,NP_001167568.1|
AAAPAPVSEAVC[333]R (+2)	2	1573.79	1574.59	NP_775083.1|,NP_001035905.1|,NP_001177371.1|
LM[16]DQNLKC[333]LSAAEEK (+2)	2	2040.99	1692.95	NP_705935.1|,NP_001036817.1|
IIYGGSVTGATC[333]K (+2)	2	1601.81	1602.64	NP_001244955.1|,NP_000356.1|,NP_001152759.1|
KETGAASFLC[333]R (+3)	2	1514.76	1515.52	NP_003282.2|
NM[16]SVHLSPC[333]FR (+3)	2	1638.76	1290.51	NP_001006.1|
TNHIGHTGYLNTVTVSPDGSLC[333]ASGGK (+4)	2	3018.45	3020.08	NP_006089.1|
C[57]C[57]LTYC[333]FNKPEDK (+3)	2	2009.87	2011.03	NP_001129064.1|,NP_002945.1|,NP_001170884.1|
SASVAPFTC[333]K (+2)	2	1342.66	1010.16	NP_005115.2|
VC[333]EEIAIIPSKK (+3)	2	1661.91	1662.77	NP_001012.1|,NP_001185986.1|
FIC[333]TTSAIQNR (+2)	2	1585.79	1586.6	NP_942127.1|,NP_001087.2|
IISNASC[333]TTNC[57]LAPLAK (+3)	2	2109.06	2110.21	NP_002037.2|,NP_001243728.1|
VNQIGSVTESLQAC[333]K (+2)	2	1908.96	1909.94	NP_001419.1|,NP_001188412.1|
VNQIGSVTESLQAC[333]K (+3)	2	1908.96	1909.94	NP_001419.1|,NP_001188412.1|
SGDAAIVDM[16]VPGKPMC[333]VESFSDYPPLGR (+4)	2	3286.53	3288.51	NP_001393.1|
KDGNASGTTLLEALDC[333]ILPPTRPTDK (+4)	2	3058.56	3060.22	NP_001393.1|
NVC[333]LPPEM[16]EVALTEDQVPALK (+3)	2	2644.31	2645.82	NP_002366.2|,NP_001127836.1|
DGNASGTTLLEALDC[333]ILPPTRPTDKPLR (+5)	2	3296.71	2965.34	NP_001393.1|
DGNASGTTLLEALDC[333]ILPPTRPTDKPLR (+3)	2	3296.71	3298.51	NP_001393.1|
GLIAAIC[333]AGPTALLAHEIGFGSK (+3)	2	2542.36	2543.76	NP_009193.2|,NP_001116849.1|
AYHEQLSVAEITNAC[333]FEPANQM[16]VK (+3)	2	3041.43	2694	NP_005991.1|,NP_006073.2|,NP_997195.1|,NP_525125.2|,NP_005992.1|,NP_006000.2|,NP_001257328.1|,NP_001257329.1|
PGHLQEGFGC[333]VVTNR (+2)	2	1945.95	1613.8	NP_001018077.1|,NP_001018078.1|,NP_056455.3|,NP_001018079.1|
EQC[57]C[333]YNC[57]GKPGHLAR (+4)	2	2124.93	1678.91	NP_003409.1|,NP_001120664.1|,NP_001120665.1|,NP_001120666.1|,NP_001120667.1|,NP_001120668.1|
YLAEVAC[333]GDDRK (+3)	2	1671.79	1672.64	NP_006817.1|
ELEKVC[333]NPIITK (+3)	2	1718.93	1386.66	NP_006588.1|
FAC[333]HSASLTVR (+3)	2	1523.76	1191.36	NP_031389.3|,NP_001138880.1|,NP_001138881.1|,NP_001138882.1|
IC[57]TLPEKC[333]AVDK (+3)	2	1708.85	1319.59	NP_659400.2|
AVLFC[333]LSEDKK (+2)	2	1584.82	1585.65	NP_005498.1|
C[333]LELFSELAEDKENYK (+3)	2	2263.07	1931.12	NP_031381.2|
AHVVPC[333]FDASK (+2)	2	1505.73	1173.34	NP_001447.2|,NP_001104026.1|
SC[57]YDLSC[333]HAR (+3)	2	1543.65	1154.28	NP_002038.2|
KLEEEQIILEDQNC[333]K (+3)	2	2164.07	2165.21	NP_002464.1|
FAC[333]HSASLTVR (+2)	2	1523.76	1191.36	NP_031389.3|,NP_001138880.1|,NP_001138881.1|,NP_001138882.1|
QTISNAC[333]GTIGLIHAIANNK (+3)	2	2371.23	2039.32	NP_005993.1|
SIHDALC[333]VIR (+3)	2	1458.77	1126.33	NP_006421.2|,NP_001243650.1|
KC[333]LELFTELAEDKENYK (+3)	2	2405.18	2073.32	NP_001017963.2|,NP_005339.3|
NM[16]M[16]AAC[333]DPR (+2)	2	1372.56	1008.2	NP_006078.2|,NP_115914.1|,NP_821133.1|,NP_817124.1|,NP_821080.1|,NP_006079.1|,NP_001060.1|,NP_006077.2|,NP_001184110.1|
ALANSLAC[333]QGK (+3)	2	1407.72	1075.24	NP_001230106.1|,NP_000025.1|,NP_908930.1|,NP_908932.1|,NP_001121089.1|
TAGQTGM[16]C[333]GGVR (+2)	2	1485.67	1137.29	NP_060531.2|
EKPVC[333]GTTYK (+2)	2	1457.72	1125.3	NP_005889.3|,NP_976240.1|
M[16]RPGVAC[333]SVSQAQK (+3)	2	1809.89	1810.87	NP_000652.2|,NP_001020092.1|
VAC[333]IGAWHPAR (+3)	2	1512.77	1180.38	NP_005052.1|,NP_000958.1|,NP_001029025.1|
ISIC[333]SSDKR (+3)	2	1340.68	1008.15	NP_004955.2|
M[16]LPDKDC[333]R (+3)	2	1325.61	977.16	NP_005498.1|
SC[333]YDLSC[57]HAR (+2)	2	1543.65	1154.28	NP_002038.2|
INQLC[333]SQTK (+2)	2	1366.69	1034.19	NP_001193496.1|,NP_005522.2|
YC[333]YYNETHK (+3)	2	1552.67	1220.31	NP_078938.2|,NP_001137502.1|
PTC[57]PYC[333]R (+2)	2	1228.54	838.994	NP_001230587.1|,NP_001230588.1|,NP_002055.1|,NP_001112362.1|
ATVFLNPAAC[333]K (+2)	2	1466.76	1134.35	NP_060708.1|
LC[333]YVALDFEQEMAMAASSSSLEK (+2)	2	2855.31	2523.85	XP_933678.1|
AYGGSM[16]C[333]AK (+2)	2	1235.53	887.036	NP_000986.2|,NP_296374.1|
KTPC[333]GEGSK (+2)	2	1238.6	906.016	NP_001014.1|,NP_001139699.1|
VNNSC[333]QK (+2)	2	1124.53	791.873	NP_061156.1|
WC[333]NEHLK (+3)	2	1261.59	929.054	NP_001449.3|,NP_001120959.1|,NP_001447.2|,NP_001104026.1|,NP_001448.2|,NP_001157789.1|,NP_001157790.1|,NP_001157791.1|
M[16]VGC[333]TGK (+2)	2	1043.48	694.864	NP_005380.2|,NP_001238978.1|,NP_001238979.1|,NP_001238981.1|,NP_001238982.1|,NP_001238980.1|
HC[333]DLQVR (+2)	2	1202.59	869.988	NP_003741.1|
IAVHC[333]TVR (+3)	2	1230.65	898.085	NP_000966.2|,NP_001186731.1|
LNVC[333]VSK (+2)	2	1094.58	761.93	NP_001524.2|,NP_001005335.1|,NP_612403.2|,NP_001136122.1|
APQC[333]LGK (+2)	2	1048.54	715.862	NP_004492.2|,NP_114032.2|
AYHEQLTVAEITNAC[333]FEPANQM[16]VK (+3)	2	3055.44	2708.03	NP_116093.1|
ATNVC[333]TR (+2)	2	1096.53	763.863	NP_003592.3|
KPVTDC[333]VISVPSFFTDAER (+3)	2	2443.21	2111.37	NP_006635.2|
IISNASC[57]TTNC[333]LAPLAK (+3)	2	2109.06	2110.21	NP_002037.2|,NP_001243728.1|
NMAC[333]VQR (+2)	2	1153.54	820.981	NP_003555.1|
NASC[333]GTR (+2)	2	1040.47	707.757	NP_006799.1|
IKNC[333]LNPQFSK (+3)	2	1623.84	1291.52	NP_003900.1|
AVVVC[333]PK (+2)	2	1047.58	714.917	NP_004492.2|,NP_114032.2|
DKMC[333]SM[16]VK (+2)	2	1289.58	941.191	NP_000997.1|
GIFPVLC[333]K (+2)	2	1208.66	876.117	NP_002645.3|,NP_872270.1|,NP_872271.1|,NP_001193725.1|,NP_001193726.1|,NP_001193727.1|,NP_001193728.1|
KC[333]SASNR (+3)	2	1097.53	764.851	NP_001015.1|
ELC[333]ELKPK (+3)	2	1291.68	959.161	NP_036256.2|,NP_001137545.1|
QPISC[333]VK (+2)	2	1106.58	773.941	NP_115766.3|
AC[333]VM[16]MQGR (+2)	2	1243.55	895.125	NP_000261.2|
YDDM[16]AAC[333]M[16]K (+2)	2	1411.55	1047.23	NP_003397.1|,NP_663723.1|,NP_001129171.1|,NP_001129172.1|,NP_001129173.1|,NP_001129174.1|
YC[333]QVIR (+2)	2	1113.56	780.935	NP_000958.1|
NM[16]AC[333]VQR (+2)	2	1169.53	820.981	NP_003555.1|
WC[333]NEHLK (+2)	2	1261.59	929.054	NP_001449.3|,NP_001120959.1|,NP_001447.2|,NP_001104026.1|,NP_001448.2|,NP_001157789.1|,NP_001157790.1|,NP_001157791.1|
TLC[333]GC[57]R (+2)	2	1041.47	651.8	NP_003008.1|
KTPC[333]GEGSK (+3)	2	1238.6	906.016	NP_001014.1|,NP_001139699.1|
LCC[333]C[57]PRC[57]CCPR (+2)	2	1702.67	1256.63	XXX_NP_112238.1|
LVGHC[333]R (+2)	2	1016.52	683.823	XXX_NP_008823.1|
WC[333]DC[333]KLPNSK (+2)	2	1858.87	1193.4	NP_031401.1|
KQLEEAFKQQAATEC[333]QLK (+3)	2	2425.23	2093.36	XXX_NP_659415.1|
C[333]SCPLLPPR (+2)	2	1317.66	985.225	NP_008977.1|
LVTSPC[333]C[57]IVTSTYGWTANM[16]ER (+3)	2	2737.26	2332.67	NP_001017963.2|,NP_005339.3|
AAVEEGIVLGGGC[333]ALLR (+3)	2	1960.05	1961.07	NP_002147.2|,NP_955472.1|
TAVC[333]DIPPR (+2)	2	1303.66	1304.3	NP_006078.2|,NP_821133.1|,NP_817124.1|,NP_821080.1|,NP_006079.1|,NP_001060.1|
KGDC[333]RDSWRSNK (+2)	2	1783.84	1451.57	NP_037450.2|
AKFENLC[333]K (+2)	2	1284.65	952.129	NP_031381.2|
QGVC[333]VNIR (+3)	1	1220.63	1221.22	DECOY_0_NP_054742.2|
KC[333]STPEEIKK (+3)	1	1494.78	1495.53	NP_006861.1|,NP_001011546.1|
KC[333]GIQDTNSK (+2)	1	1425.69	1093.21	NP_054862.1|,NP_001254635.1|
ATC[333]APQHGAPGPGPADASK (+2)	1	2064.97	1732.87	NP_001447.2|,NP_001104026.1|
IHEGC[333]EEPATHNALAK (+3)	1	2051.97	2053.04	NP_004850.1|
RC[333]QYVTEK (+3)	1	1358.67	1359.34	NP_001230106.1|,NP_000025.1|,NP_908930.1|,NP_908932.1|,NP_001121089.1|,NP_005156.1|
RC[333]QYVTEK (+2)	1	1358.67	1359.34	NP_001230106.1|,NP_000025.1|,NP_908930.1|,NP_908932.1|,NP_001121089.1|,NP_005156.1|
LNKC[333]GVISPR (+2)	1	1418.77	1086.31	NP_001010.2|,NP_001025180.1|
EAQNLQC[333]AASTAQESC[57]PPKPPR (+3)	1	2715.27	2326.57	NP_056315.1|,NP_950251.1|
KAQC[333]PIVER (+3)	1	1375.73	1376.41	NP_001000.2|
SGQGAFGNMC[333]R (+3)	1	1459.63	1127.25	NP_000959.2|
NYLEPGKEC[333]VQPATK (+2)	1	2008.99	1676.89	NP_733765.1|
EIVHLQAGQC[333]GNQIGAK (+2)	1	2098.06	1765.99	NP_006078.2|,NP_006079.1|
KVEELQAC[333]VETAR (+3)	1	1807.91	1475.67	NP_006176.2|
HC[333]NMVLENVK (+3)	1	1518.73	1519.57	NP_004588.1|,NP_808210.2|
HC[333]NMVLENVK (+2)	1	1518.73	1519.57	NP_004588.1|,NP_808210.2|
TLIQNC[333]GASTIR (+2)	1	1608.83	1276.46	NP_005989.3|,NP_001008800.1|
IAQLIC[333]ER (+2)	1	1277.68	945.138	NP_001020419.1|,NP_001939.1|,NP_001020420.1|
LLEC[333]PHLNVR (+3)	1	1525.81	1193.42	NP_078934.3|
AVLFC[333]LSEDKK (+3)	1	1584.82	1252.48	NP_005498.1|
DVIEEYFKC[333]K (+2)	1	1605.77	1273.45	NP_001007.2|
VQEKC[333]QLEINFNTLQTK (+3)	1	2368.21	2369.48	NP_004915.2|,NP_001093.1|,NP_001123476.1|,NP_001123477.1|,NP_001094.1|
PM[16]C[333]VESFSDYPPLGR (+2)	1	2045.92	1697.93	NP_001393.1|
AYHEQLSVAEITNAC[333]FEPANQM[16]VK (+4)	1	3041.43	3043.17	NP_005991.1|,NP_006073.2|,NP_997195.1|,NP_525125.2|,NP_005992.1|,NP_006000.2|,NP_001257328.1|,NP_001257329.1|
AAVEEGIVLGGGC[333]ALLR (+2)	1	1960.05	1627.9	NP_002147.2|,NP_955472.1|
KDGNASGTTLLEALDC[333]ILPPTRPTDKPLR (+4)	1	3424.8	3093.51	NP_001393.1|
KDGNASGTTLLEALDC[333]ILPPTRPTDKPLR (+5)	1	3424.8	3093.51	NP_001393.1|
AVC[333]M[16]LSNTTAIAEAWAR (+3)	1	2156.04	1808.09	NP_005991.1|,NP_006073.2|,NP_997195.1|,NP_525125.2|,NP_005992.1|,NP_001180343.1|,NP_061816.1|,NP_006000.2|,NP_001257328.1|,NP_001257329.1|,XP_003846706.1|
SGDAAIVDM[16]VPGKPMC[333]VESFSDYPPLGR (+3)	1	3286.53	2939.34	NP_001393.1|
ESGSLSPEHGPVVVHC[333]SAGIGR (+4)	1	2507.22	2175.38	NP_002818.1|
VNQIGSVTESIQAC[333]K (+2)	1	1908.96	1576.77	NP_001967.3|,NP_443739.3|,NP_001180432.1|
LVTSPC[57]C[333]IVTSTYGWTANM[16]ER (+3)	1	2737.26	2332.67	NP_001017963.2|,NP_005339.3|
YC[333]YYNETHK (+2)	1	1552.67	1220.31	NP_078938.2|,NP_001137502.1|
HGEVC[333]PAGWKPGSDTIKPDVQK (+4)	1	2681.33	2349.62	NP_859048.1|,NP_859047.1|,NP_002565.1|,NP_001189360.1|
KGEDEDKGPPC[333]GPVNC[57]NEK (+3)	1	2405.06	2016.17	NP_788955.1|,NP_006254.1|
HIGVC[333]ISVANNR (+2)	1	1614.83	1282.47	NP_006363.4|,NP_001153148.1|,NP_001153147.1|,NP_001153145.1|,NP_001153146.1|,NP_001153149.1|,NP_001240700.1|
VNQIGSVTESIQAC[333]K (+3)	1	1908.96	1576.77	NP_001967.3|,NP_443739.3|,NP_001180432.1|
KKGEDEDKGPPC[333]GPVNC[57]NEK (+3)	1	2533.16	2144.34	NP_788955.1|,NP_006254.1|
TFVSGAC[333]DASIK (+2)	1	1530.74	1198.35	NP_005264.2|
IAVAAQNC[333]YK (+3)	1	1412.71	1080.26	NP_000356.1|,NP_001152759.1|
ITGC[333]ASPGK (+2)	1	1165.58	832.965	NP_006421.2|,NP_001243650.1|
ELEKVC[333]NPIITK (+2)	1	1718.93	1386.66	NP_006588.1|
YVLC[333]TAPR (+2)	1	1254.64	922.103	NP_002379.3|,NP_001257401.1|
KC[333]AC[57]ASHVAK (+2)	1	1406.68	1017.23	NP_004386.2|,NP_543157.1|
TTQFSC[333]TLGEK (+2)	1	1546.73	1214.35	NP_001435.1|
AVLC[333]PPPVK (+2)	1	1255.7	923.174	NP_008839.2|,NP_061485.1|,NP_005043.1|
KC[333]YEM[16]ASHLR (+2)	1	1585.74	1237.45	NP_005013.1|
C[333]PFTGNVSIR (+2)	1	1425.71	1093.26	NP_001006.1|
GLDVNKC[333]EIAR (+2)	1	1549.79	1217.4	NP_055140.1|
EEHLC[333]TQR (+2)	1	1347.62	1015.1	NP_705935.1|,NP_001036816.1|
GPAIGIDLGTTYSC[333]VGVFQHGK (+3)	1	2552.27	2220.5	NP_068814.2|
IIPGFM[16]C[333]QGGDFTR (+2)	1	1889.88	1541.79	NP_001157733.1|,NP_001157734.1|,NP_066953.1|,NP_839944.1|,NP_001137355.1|,NP_001129261.1|,NP_001137504.1|,XP_001718975.3|,XP_372741.4|,XP_003846538.1|,XP_003846552.1|,XP_003846565.1|
M[16]MIPDC[333]QRR (+3)	1	1497.69	1149.41	NP_004598.1|
SAFLC[333]GVM[16]K (+2)	1	1303.63	955.196	NP_006363.4|,NP_001153148.1|,NP_001153147.1|,NP_001153146.1|,NP_001153149.1|,NP_005817.1|,NP_001095868.1|
KC[333]LELFTELAEDKENYKK (+4)	1	2533.28	2201.5	NP_001017963.2|,NP_005339.3|
LC[333]DSYEIRPGK (+3)	1	1612.79	1280.45	NP_005817.1|,NP_001095867.1|,NP_001095868.1|,NP_001095869.1|
LPVLAGC[333]LK (+2)	1	1245.72	913.179	NP_008835.5|,NP_001075109.1|
ITEFC[333]HR (+3)	1	1237.59	905.032	NP_000909.2|
AYHEQLSVAEITNAC[333]FEPANQMVK (+4)	1	3025.43	2694	NP_005991.1|,NP_006073.2|,NP_997195.1|,NP_525125.2|,NP_005992.1|,NP_006000.2|,NP_001257328.1|,NP_001257329.1|
VAC[333]IGAWHPAR (+2)	1	1512.77	1180.38	NP_005052.1|,NP_000958.1|,NP_001029025.1|
EKPVC[333]GTTYK (+3)	1	1457.72	1125.3	NP_005889.3|,NP_976240.1|
VVGC[333]SC[57]VVVK (+2)	1	1381.71	992.257	NP_001007.2|
HQSLQC[333]R (+2)	1	1203.58	870.977	NP_002650.1|,NP_001005377.1|
EYKC[333]GDLVFAK (+2)	1	1604.79	1272.47	NP_004485.1|
EYKC[333]GDLVFAK (+3)	1	1604.79	1272.47	NP_004485.1|
TIAPC[333]QK (+3)	1	1092.56	759.914	NP_004125.3|
KC[333]LEELQK (+3)	1	1322.69	990.175	NP_002785.1|,NP_001186708.1|,NP_001186709.1|
KC[333]AADLGLNK (+2)	1	1364.71	1032.22	NP_005331.1|
LGSISC[333]K (+2)	1	1039.54	706.852	NP_003671.1|
CC[333]CCIK (+2)	1	1004.4	671.917	XXX_NP_115827.1|
C[57]C[333]LTYC[57]FNKPEDK (+3)	1	2009.87	1563.82	NP_001129064.1|,NP_002945.1|,NP_001170884.1|
KYEDIC[333]PSTHNMDVPNIK (+3)	1	2436.15	2104.36	NP_001093162.1|,NP_001137232.1|,NP_001961.1|,NP_001137233.1|,NP_001137234.1|,NP_065123.1|
ELPGHTGYLSC[333]C[57]R (+3)	1	1824.83	1435.63	NP_005264.2|,NP_067642.1|
AILPC[333]IK (+2)	1	1089.63	756.996	NP_001407.1|,NP_001191439.1|
VC[333]NPIITK (+2)	1	1219.66	887.098	NP_006588.1|
PGQC[333]GR (+2)	1	949.444	616.691	NP_001003.1|
LQISM[16]C[333]QK (+2)	1	1298.64	950.178	NP_004108.1|,NP_001139247.1|,NP_001139248.1|
KGDEC[333]ELLGHSK (+3)	1	1647.79	1315.45	NP_003312.3|
KVVGC[333]SC[57]VVVK (+2)	1	1509.8	1120.43	NP_001007.2|
HC[333]GALR (+2)	1	988.491	655.77	NP_002939.2|,NP_001240308.1|,NP_001240309.1|,NP_001240311.1|,NP_001240312.1|,NP_001240313.1|
DKM[16]C[333]SM[16]VK (+2)	1	1305.58	941.191	NP_000997.1|
HLPGVC[333]K (+3)	1	1085.57	752.925	NP_001164014.1|,NP_001164015.1|,NP_612642.2|
AVLC[333]PPPVKK (+3)	1	1383.79	1051.35	NP_008839.2|,NP_061485.1|,NP_005043.1|
AKFENLC[333]K (+3)	1	1284.65	952.129	NP_031381.2|
KC[333]SEVAR (+3)	1	1124.56	791.916	NP_114127.3|,NP_060658.3|,NP_001164006.1|,NP_001164007.1|
SILC[333]C[57]LR (+2)	1	1196.6	807.037	NP_006592.3|
NPVSQC[333]MR (+2)	1	1266.58	934.095	NP_031401.1|
FENLC[333]K (+2)	1	1085.52	752.879	NP_031381.2|,NP_001017963.2|,NP_005339.3|
KPQVNKRPVLWC[57]SSC[333]R (+3)	1	2290.18	1901.26	XXX_NP_001096637.1|
GNSPPSSGEAC[333]R (+2)	1	1493.66	1161.2	NP_003482.1|,NP_001243048.1|,NP_001243049.1|
KC[333]STPEEIK (+2)	1	1366.68	1034.18	NP_006861.1|,NP_001011546.1|
AVAILC[333]NHQR (+3)	1	1456.76	1124.32	NP_003277.1|
SGDAAIVDM[16]VPGKPM[16]C[333]VESFSDYPPLGR (+3)	1	3302.53	3304.5	NP_001393.1|
EIVHIQAGQC[333]GNQIGAK (+3)	1	2098.06	1765.99	NP_821133.1|,NP_821080.1|,NP_001060.1|,NP_006077.2|
NTGIIC[333]TIGPASR (+2)	1	1634.85	1635.67	NP_002645.3|,NP_872270.1|,NP_872271.1|,NP_001193725.1|,NP_001193726.1|,NP_001193728.1|
AAAPAPVSEAVC[333]R (+3)	1	1573.79	1241.42	NP_775083.1|,NP_001035905.1|,NP_001177371.1|
IIYGGSVTGATC[333]K (+3)	1	1601.81	1269.47	NP_001244955.1|,NP_000356.1|,NP_001152759.1|
LLVGNKC[333]DLTTK (+2)	1	1636.89	1637.72	NP_004152.1|
LLVGNKC[333]DLTTK (+3)	1	1636.89	1637.72	NP_004152.1|
EKLC[333]YVALDFEQEMAMAASSSSLEK (+3)	1	3112.44	2781.14	XP_933678.1|
TYAIC[333]GAIR (+2)	1	1299.66	1300.31	NP_001015.1|
M[16]LSC[333]AGADR (+2)	1	1271.56	923.069	NP_542784.1|,NP_006004.2|,NP_001243506.1|,NP_001243509.1|
VAGINAC[333]GR (+2)	1	1192.6	859.994	NP_005325.2|
SC[57]YDLSC[333]HAR (+2)	1	1543.65	1154.28	NP_002038.2|
KC[333]LEEQGLK (+2)	1	1379.71	1380.4	NP_001896.2|
M[16]LPDKDC[333]R (+2)	1	1325.61	977.16	NP_005498.1|
ALVDGPC[333]TQVR (+2)	1	1490.76	1158.33	NP_003964.3|,NP_001030168.1|
FLSQIESDC[333]LALLQVR (+3)	1	2167.13	1835.13	NP_000180.2|
LLLGNKC[333]DM[16]EAK (+3)	1	1682.84	1334.6	NP_002861.1|
QVLIRPC[333]SK (+2)	1	1375.76	1376.45	NP_001010.2|,NP_001025180.1|
M[16]WQSMC[333]PLR (+2)	1	1499.67	1151.43	NP_054733.2|
VDVFREDLC[333]TK (+3)	1	1656.82	1324.5	NP_788955.1|,NP_006254.1|
LSTAC[333]PGR (+2)	1	1136.56	803.927	NP_001307.2|,NP_001243064.1|
C[57]PEALFQPCFLGMESC[333]GIHETTFNSIM[16]K (+3)	1	3538.57	3134.65	NP_001077007.1|,NP_001093241.1|,XP_003846703.1|,XP_933678.1|,XP_934799.2|
C[333]HTPPLYR (+2)	1	1318.65	986.148	NP_000971.1|
TIQFVDWC[333]PTGFK (+3)	1	1873.91	1541.77	NP_997195.1|,NP_525125.2|,NP_005992.1|,NP_116093.1|,NP_001180343.1|,NP_061816.1|,NP_006000.2|,NP_001257328.1|,NP_001257329.1|
AVAAGNSC[333]R (+2)	1	1180.57	847.94	NP_055874.2|,NP_006280.3|
KLENC[333]NYAVELGK (+3)	1	1812.91	1813.85	NP_005023.2|,NP_001165806.1|,NP_001129497.1|,NP_002289.2|
IM[16]EKC[333]TLPLTGK (+3)	1	1681.88	1333.66	NP_000427.1|
NTGIIC[333]TIGPASR (+3)	1	1634.85	1302.5	NP_002645.3|,NP_872270.1|,NP_872271.1|,NP_001193725.1|,NP_001193726.1|,NP_001193728.1|
LSQEC[333]PIK (+2)	1	1249.64	917.081	NP_001153239.1|,NP_054757.1|
LLEKC[333]AM[16]TALSSK (+2)	1	1742.89	1394.7	NP_006420.1|,NP_001159756.1|,NP_001159757.1|
MVGC[333]TGK (+2)	1	1027.48	694.864	NP_005380.2|,NP_001238978.1|,NP_001238979.1|,NP_001238981.1|,NP_001238982.1|,NP_001238980.1|
NIEKEC[333]NAK (+2)	1	1380.67	1048.17	NP_973726.2|,NP_004621.2|,NP_973724.1|,NP_973727.1|,NP_001171501.1|,NP_001171502.1|
AYHEQLTVAEITNAC[333]FEPANQM[16]VK (+4)	1	3055.44	2708.03	NP_116093.1|
QLC[333]TERQK (+2)	1	1337.68	1005.15	NP_001137485.1|,NP_001157935.1|,NP_872394.2|,NP_115636.1|,NP_005045.2|,NP_001032955.1|,NP_001116835.1|,NP_006258.3|
TIAPC[333]QK (+2)	1	1092.56	759.914	NP_004125.3|
KDEQERC[333]ITIK (+3)	1	1694.87	1362.55	NP_001952.1|
KPQVNKRPVLWC[333]SSC[57]R (+3)	1	2290.18	1901.26	XXX_NP_001096637.1|
IGNC[333]PFSQR (+2)	1	1353.65	1021.15	NP_001279.2|,NP_058625.2|,NP_001242952.1|,NP_001107558.1|,NP_444507.1|,NP_039234.1|
AYGGSMC[333]AK (+2)	1	1219.54	887.036	NP_000986.2|,NP_296374.1|
CC[333]C[333]C[333]IKGK (+2)	1	1855.85	857.14	XXX_NP_115827.1|
SLSGSSPC[333]PK (+2)	1	1294.62	962.079	NP_057417.3|
EALNSC[333]NKR (+3)	1	1366.67	1034.15	NP_005372.2|
TYPGVMHSSC[333]PQEMAAVK (+3)	1	2268.04	1936.24	NP_009191.1|
KLENC[333]NYAVELGK (+2)	1	1812.91	1480.68	NP_005023.2|,NP_001165806.1|,NP_001129497.1|,NP_002289.2|
EQC[333]C[57]YNC[57]GKPGHLAR (+4)	1	2124.93	2126.13	NP_003409.1|,NP_001120664.1|,NP_001120665.1|,NP_001120666.1|,NP_001120667.1|,NP_001120668.1|
KFIAYC[333]RVKCGPR (+2)	1	1872.99	1874.07	NP_006730.2|
LRC[333]DSADLR (+3)	1	1380.68	1381.34	NP_001070908.1|,NP_055554.1|,NP_001070909.1|
AC[333]NC[57]LLLK (+2)	1	1266.65	1267.32	NP_001967.3|,NP_443739.3|,NP_001180432.1|,NP_001966.1|

## Sheet: Protein View
Accession	Cluster	Count	Coverage	Protein Group	Gene Id	Gene Name	Chromosome	Gene Family	Distinct Peptides	Distinct Matches	Filtered Spectra	Description	Modified Sites	Peptide Sequences
NP_005498.1|	266	1	80.1205	530	CFL1	cofilin 1 (non-muscle)	11q13.1		5	9	20	|CFL1|1072|P23528|cofilin-1 [Homo sapiens]	333@C80,333@C147,333@C139,333@C39	MLPDKDCR,DRCTLAEK,HELQANCYEEVKDR,HELQANCYEEVKDRCTLAEK,AVLFCLSEDKK
NP_001393.1|	607	1	41.7749	744	EEF1A1	eukaryotic translation elongation factor 1 alpha 1	6q14.1		5	10	17	|EEF1A1|1915|P68104;Q6IPS9|elongation factor 1-alpha 1 [Homo sapiens]	333@C411,333@C234	PMCVESFSDYPPLGR,SGDAAIVDMVPGKPMCVESFSDYPPLGR,KDGNASGTTLLEALDCILPPTRPTDKPLR,KDGNASGTTLLEALDCILPPTRPTDK,DGNASGTTLLEALDCILPPTRPTDKPLR
NP_001017963.2|,NP_005339.3|	359	2	56.7037	887	HSP90AA1	heat shock protein 90kDa alpha (cytosolic), class A member 1	14q32.33	HSPC	4	5	7	|HSP90AA1|3320|P07900|heat shock protein HSP 90-alpha isoform 2 [Homo sapiens]	333@C694,333@C572,333@C720,333@C598,333@C542,333@C420,333@C719,333@C597	FENLCK,LVTSPCCIVTSTYGWTANMER,KCLELFTELAEDKENYK,KCLELFTELAEDKENYKK
NP_001017963.2|			52.3419		HSP90AA1	heat shock protein 90kDa alpha (cytosolic), class A member 1	14q32.33	HSPC				|HSP90AA1|3320|P07900;Q86SX1|heat shock protein HSP 90-alpha isoform 1 [Homo sapiens]	333@C542,333@C694,333@C720,333@C719
NP_005339.3|			61.0656		HSP90AA1	heat shock protein 90kDa alpha (cytosolic), class A member 1	14q32.33	HSPC				|HSP90AA1|3320|P07900|heat shock protein HSP 90-alpha isoform 2 [Homo sapiens]	333@C420,333@C572,333@C598,333@C597
NP_525125.2|,NP_005992.1|	31	2	48.6667	331	TUBA3C	tubulin, alpha 3c	13q12.11	TUB	3	5	6	|TUBA3C|7278|Q13748;Q1ZYQ1|tubulin alpha-3C/D chain [Homo sapiens]	333@C295,333@C376,333@C347	AYHEQLSVAEITNACFEPANQMVK,AVCMLSNTTAIAEAWAR,TIQFVDWCPTGFK
NP_525125.2|			48.6667		TUBA3D	tubulin, alpha 3d	2q21.1	TUB				|TUBA3D|113457|Q13748;Q1ZYQ1|tubulin alpha-3C/D chain [Homo sapiens]	333@C295,333@C347,333@C376
NP_005992.1|			48.6667		TUBA3C	tubulin, alpha 3c	13q12.11	TUB				|TUBA3C|7278|Q13748;Q1ZYQ1|tubulin alpha-3C/D chain [Homo sapiens]	333@C295,333@C347,333@C376
NP_997195.1|	31	1	42.2222	332	TUBA3E	tubulin, alpha 3e	2q21.1	TUB	3	5	6	|TUBA3E|112714|Q6PEY2|tubulin alpha-3E chain [Homo sapiens]	333@C295,333@C376,333@C347	AYHEQLSVAEITNACFEPANQMVK,AVCMLSNTTAIAEAWAR,TIQFVDWCPTGFK
NP_006000.2|,NP_001257328.1|,NP_001257329.1|	31	3	55.3913	333	TUBA1A	tubulin, alpha 1a	12q13.12	TUB	3	5	6	|TUBA1A|7846|-|tubulin alpha-1A chain isoform 2 [Homo sapiens]	333@C295,333@C260,333@C376,333@C341,333@C347,333@C312	AYHEQLSVAEITNACFEPANQMVK,AVCMLSNTTAIAEAWAR,TIQFVDWCPTGFK
NP_006000.2|			53.8803		TUBA1A	tubulin, alpha 1a	12q13.12	TUB				|TUBA1A|7846|Q71U36|tubulin alpha-1A chain isoform 1 [Homo sapiens]	333@C295,333@C347,333@C376
NP_001257328.1|			53.8803		TUBA1A	tubulin, alpha 1a	12q13.12	TUB				|TUBA1A|7846|-|tubulin alpha-1A chain isoform 1 [Homo sapiens]	333@C295,333@C347,333@C376
NP_001257329.1|			58.4135		TUBA1A	tubulin, alpha 1a	12q13.12	TUB				|TUBA1A|7846|-|tubulin alpha-1A chain isoform 2 [Homo sapiens]	333@C260,333@C312,333@C341
NP_788955.1|,NP_006254.1|	397	2	15.6313	473	PSME1	proteasome (prosome, macropain) activator subunit 1 (PA28 alpha)	14q11.2	PSM	3	3	3	|PSME1|5720|Q06323;Q6IBM2|proteasome activator complex subunit 1 isoform 1 [Homo sapiens]	333@C101,333@C22	KGEDEDKGPPCGPVNCNEK,KKGEDEDKGPPCGPVNCNEK,VDVFREDLCTK
NP_788955.1|			15.6		PSME1	proteasome (prosome, macropain) activator subunit 1 (PA28 alpha)	14q11.2	PSM				|PSME1|5720|Q06323;A6NJG9;Q86SZ9|proteasome activator complex subunit 1 isoform 2 [Homo sapiens]	333@C22,333@C101
NP_006254.1|			15.6627		PSME1	proteasome (prosome, macropain) activator subunit 1 (PA28 alpha)	14q11.2	PSM				|PSME1|5720|Q06323;Q6IBM2|proteasome activator complex subunit 1 isoform 1 [Homo sapiens]	333@C22,333@C101
NP_001447.2|,NP_001104026.1|	481	2	16.837	581	FLNA	filamin A, alpha	Xq28		3	6	14	|FLNA|2316|P21333;Q60FE5;Q6NXF2|filamin-A isoform 2 [Homo sapiens]	333@C2535,333@C2543,333@C1157,333@C53	ATCAPQHGAPGPGPADASK,AHVVPCFDASK,WCNEHLK
NP_001447.2|			16.8624		FLNA	filamin A, alpha	Xq28					|FLNA|2316|P21333;Q60FE5;Q6NXF2|filamin-A isoform 1 [Homo sapiens]	333@C53,333@C1157,333@C2535
NP_001104026.1|			16.8115		FLNA	filamin A, alpha	Xq28					|FLNA|2316|P21333;Q60FE5;Q6NXF2|filamin-A isoform 2 [Homo sapiens]	333@C53,333@C1157,333@C2543
NP_004492.2|,NP_114032.2|	519	2	29.3112	632	HNRNPU	heterogeneous nuclear ribonucleoprotein U (scaffold attachment factor A)	1q44		3	3	7	|HNRNPU|3192|Q00839;Q96BA7|heterogeneous nuclear ribonucleoprotein U isoform a [Homo sapiens]	333@C478,333@C497,333@C543,333@C562,333@C588,333@C607	KDCEVVMMIGLPGAGK,APQCLGK,AVVVCPK
NP_004492.2|			29.6526		HNRNPU	heterogeneous nuclear ribonucleoprotein U (scaffold attachment factor A)	1q44					|HNRNPU|3192|Q00839|heterogeneous nuclear ribonucleoprotein U isoform b [Homo sapiens]	333@C478,333@C543,333@C588
NP_114032.2|			28.9697		HNRNPU	heterogeneous nuclear ribonucleoprotein U (scaffold attachment factor A)	1q44					|HNRNPU|3192|Q00839;Q96BA7|heterogeneous nuclear ribonucleoprotein U isoform a [Homo sapiens]	333@C497,333@C562,333@C607
XP_933678.1|	463	1	8.93023	756	Unmapped_XP_933678.1|				3	5	14	|POTEI|653269|P0CG38|PREDICTED: POTE ankyrin domain family member I isoform 2 [Homo sapiens]	333@C917,333@C957,333@C972	LCYVALDFEQEMAMAASSSSLEK,CPEALFQPCFLGMESCGIHETTFNSIMK,EKLCYVALDFEQEMAMAASSSSLEK
NP_031381.2|	359	1	59.2541	888	HSP90AB1	heat shock protein 90kDa alpha (cytosolic), class B member 1	6p12	HSPC	3	4	6	|HSP90AB1|3326|P08238|heat shock protein HSP 90-beta [Homo sapiens]	333@C564,333@C412	FENLCK,CLELFSELAEDKENYK,AKFENLCK
NP_001007.2|	747	1	48.4848	970	RPS12	ribosomal protein S12	6q23	RPS	3	3	3	|RPS12|6206|P25398|40S ribosomal protein S12 [Homo sapiens]	333@C130,333@C106	DVIEEYFKCK,VVGCSCVVVK,KVVGCSCVVVK
NP_006079.1|	330	1	37.9775	1010	TUBB4B	tubulin, beta 4B class IVb	9q34.3	TUB	3	4	9	|TUBB4B|10383|P68371|tubulin beta-4B chain [Homo sapiens]	333@C12,333@C303,333@C354	EIVHLQAGQCGNQIGAK,NMMAACDPR,TAVCDIPPR
NP_006078.2|	330	1	27.7027	1011	TUBB4A	tubulin, beta 4A class IVa	19p13.3	TUB	3	4	9	|TUBB4A|10382|P04350|tubulin beta-4A chain [Homo sapiens]	333@C12,333@C303,333@C354	EIVHLQAGQCGNQIGAK,NMMAACDPR,TAVCDIPPR
NP_821133.1|	330	1	38.964	1012	TUBB	tubulin, beta class I	6p21.33	TUB	3	3	5	|TUBB|203068|P07437;Q5SU16|tubulin beta chain [Homo sapiens]	333@C303,333@C12,333@C354	NMMAACDPR,EIVHIQAGQCGNQIGAK,TAVCDIPPR
NP_821080.1|,NP_001060.1|	330	2	29.2135	1013	TUBB2A	tubulin, beta 2A class IIa	6p25.2	TUB	3	3	5	|TUBB2A|7280|Q13885|tubulin beta-2A chain [Homo sapiens]	333@C303,333@C12,333@C354	NMMAACDPR,EIVHIQAGQCGNQIGAK,TAVCDIPPR
NP_821080.1|			29.2135		TUBB2B	tubulin, beta 2B class IIb	6p25.2	TUB				|TUBB2B|347733|Q9BVA1|tubulin beta-2B chain [Homo sapiens]	333@C12,333@C303,333@C354
NP_001060.1|			29.2135		TUBB2A	tubulin, beta 2A class IIa	6p25.2	TUB				|TUBB2A|7280|Q13885|tubulin beta-2A chain [Homo sapiens]	333@C12,333@C303,333@C354
NP_001967.3|,NP_443739.3|	765	2	17.7419	1276	ENO3	enolase 3 (beta, muscle)	17p13.2		3	4	7	|ENO3|2027|P13929;D3DTL2|beta-enolase isoform 1 [Homo sapiens]	333@C399,333@C357,333@C337	TGAPCR,VNQIGSVTESIQACK,ACNCLLLK
NP_001967.3|			17.7419		ENO3	enolase 3 (beta, muscle)	17p13.2					|ENO3|2027|P13929;D3DTL2|beta-enolase isoform 1 [Homo sapiens]	333@C337,333@C357,333@C399
NP_443739.3|			17.7419		ENO3	enolase 3 (beta, muscle)	17p13.2					|ENO3|2027|P13929;D3DTL2|beta-enolase isoform 1 [Homo sapiens]	333@C337,333@C357,333@C399
NP_001180432.1|	765	1	17.6471	1278	ENO3	enolase 3 (beta, muscle)	17p13.2		3	4	7	|ENO3|2027|P13929|beta-enolase isoform 2 [Homo sapiens]	333@C356,333@C314,333@C294	TGAPCR,VNQIGSVTESIQACK,ACNCLLLK
NP_006799.1|	4	1	45.8333	4	SEC61B	Sec61 beta subunit	9q22.32-q31.3		2	2	4	|SEC61B|10952|P60468|protein transport protein Sec61 subunit beta [Homo sapiens]	333@C39	KNASCGTR,NASCGTR
NP_001230106.1|,NP_000025.1|,NP_908930.1|,NP_908932.1|,NP_001121089.1|	10	5	54.5959	11	ALDOA	aldolase A, fructose-bisphosphate	16p11.2		2	4	6	|ALDOA|226|P04075|fructose-bisphosphate aldolase A isoform 1 [Homo sapiens]	333@C256,333@C202,333@C393,333@C339	RCQYVTEK,ALANSLACQGK
NP_001230106.1|			48.8038		ALDOA	aldolase A, fructose-bisphosphate	16p11.2					|ALDOA|226|P04075|fructose-bisphosphate aldolase A isoform 2 [Homo sapiens]	333@C256,333@C393
NP_000025.1|			56.044		ALDOA	aldolase A, fructose-bisphosphate	16p11.2					|ALDOA|226|P04075|fructose-bisphosphate aldolase A isoform 1 [Homo sapiens]	333@C202,333@C339
NP_908930.1|			56.044		ALDOA	aldolase A, fructose-bisphosphate	16p11.2					|ALDOA|226|P04075|fructose-bisphosphate aldolase A isoform 1 [Homo sapiens]	333@C202,333@C339
NP_908932.1|			56.044		ALDOA	aldolase A, fructose-bisphosphate	16p11.2					|ALDOA|226|P04075|fructose-bisphosphate aldolase A isoform 1 [Homo sapiens]	333@C202,333@C339
NP_001121089.1|			56.044		ALDOA	aldolase A, fructose-bisphosphate	16p11.2					|ALDOA|226|P04075|fructose-bisphosphate aldolase A isoform 1 [Homo sapiens]	333@C202,333@C339
NP_055140.1|	104	1	24.0506	120	CORO1C	coronin, actin binding protein, 1C	12q24.1	WDR	2	4	11	|CORO1C|23603|Q9ULV4|coronin-1C isoform 1 [Homo sapiens]	333@C456,333@C330	SIKDTICNQDER,GLDVNKCEIAR
NP_006363.4|,NP_001153148.1|,NP_001153149.1|	137	3	11.023	158	SYNCRIP	synaptotagmin binding, cytoplasmic RNA interacting protein	6q14-q15	RBM	2	2	2	|SYNCRIP|10492|O60506;Q59GL1|heterogeneous nuclear ribonucleoprotein Q isoform 6 [Homo sapiens]	333@C237,333@C96	HIGVCISVANNR,SAFLCGVMK
NP_006363.4|			10.2729		SYNCRIP	synaptotagmin binding, cytoplasmic RNA interacting protein	6q14-q15	RBM				|SYNCRIP|10492|O60506|heterogeneous nuclear ribonucleoprotein Q isoform 1 [Homo sapiens]	333@C96,333@C237
NP_001153148.1|			11.4082		SYNCRIP	synaptotagmin binding, cytoplasmic RNA interacting protein	6q14-q15	RBM				|SYNCRIP|10492|O60506;Q59GL1|heterogeneous nuclear ribonucleoprotein Q isoform 5 [Homo sapiens]	333@C96,333@C237
NP_001153149.1|			11.3879		SYNCRIP	synaptotagmin binding, cytoplasmic RNA interacting protein	6q14-q15	RBM				|SYNCRIP|10492|O60506;Q59GL1|heterogeneous nuclear ribonucleoprotein Q isoform 6 [Homo sapiens]	333@C96,333@C237
NP_001153147.1|,NP_001153146.1|	137	2	10.2549	159	SYNCRIP	synaptotagmin binding, cytoplasmic RNA interacting protein	6q14-q15	RBM	2	2	2	|SYNCRIP|10492|O60506;Q59GL1|heterogeneous nuclear ribonucleoprotein Q isoform 3 [Homo sapiens]	333@C237,333@C96	HIGVCISVANNR,SAFLCGVMK
NP_001153147.1|			9.69388		SYNCRIP	synaptotagmin binding, cytoplasmic RNA interacting protein	6q14-q15	RBM				|SYNCRIP|10492|O60506|heterogeneous nuclear ribonucleoprotein Q isoform 4 [Homo sapiens]	333@C96,333@C237
NP_001153146.1|			10.8159		SYNCRIP	synaptotagmin binding, cytoplasmic RNA interacting protein	6q14-q15	RBM				|SYNCRIP|10492|O60506;Q59GL1|heterogeneous nuclear ribonucleoprotein Q isoform 3 [Homo sapiens]	333@C96,333@C237
NP_005817.1|,NP_001095868.1|	137	2	13.3964	160	HNRNPR	heterogeneous nuclear ribonucleoprotein R	1p36.12	RBM	2	2	2	|HNRNPR|10236|O43390|heterogeneous nuclear ribonucleoprotein R isoform 1 [Homo sapiens]	333@C99,333@C226	SAFLCGVMK,LCDSYEIRPGK
NP_005817.1|			13.4281		HNRNPR	heterogeneous nuclear ribonucleoprotein R	1p36.12	RBM				|HNRNPR|10236|O43390|heterogeneous nuclear ribonucleoprotein R isoform 2 [Homo sapiens]	333@C99,333@C226
NP_001095868.1|			13.3648		HNRNPR	heterogeneous nuclear ribonucleoprotein R	1p36.12	RBM				|HNRNPR|10236|O43390|heterogeneous nuclear ribonucleoprotein R isoform 1 [Homo sapiens]	333@C99,333@C226
XXX_NP_115827.1|	232	1		269	Unmapped_XXX_NP_115827.1|				2	2	2			CCCCIK,CCCCIKGK
NP_006861.1|,NP_001011546.1|	266	2	37.8112	307	DSTN	destrin (actin depolymerizing factor)	20p12.1		2	2	2	|DSTN|11034|P60981|destrin isoform b [Homo sapiens]	333@C23,333@C6	KCSTPEEIKK,KCSTPEEIK
NP_006861.1|			35.7576		DSTN	destrin (actin depolymerizing factor)	20p12.1					|DSTN|11034|P60981|destrin isoform a [Homo sapiens]	333@C23
NP_001011546.1|			39.8649		DSTN	destrin (actin depolymerizing factor)	20p12.1					|DSTN|11034|P60981|destrin isoform b [Homo sapiens]	333@C6
NP_006073.2|	31	1	53.8803	334	TUBA1B	tubulin, alpha 1b	12q13.12	TUB	2	4	5	|TUBA1B|10376|P68363|tubulin alpha-1B chain [Homo sapiens]	333@C295,333@C376	AYHEQLSVAEITNACFEPANQMVK,AVCMLSNTTAIAEAWAR
NP_116093.1|	31	1	49.4432	335	TUBA1C	tubulin, alpha 1c	12q13.12	TUB	2	3	4	|TUBA1C|84790|Q9BQE3|tubulin alpha-1C chain [Homo sapiens]	333@C295,333@C347	AYHEQLTVAEITNACFEPANQMVK,TIQFVDWCPTGFK
NP_872270.1|,NP_872271.1|,NP_001193725.1|,NP_001193728.1|	320	4	56.277	376	PKM	pyruvate kinase, muscle	15q23		2	3	4	|PKM|5315|P14618|pyruvate kinase isozymes M1/M2 isoform f [Homo sapiens]	333@C474,333@C548,333@C479,333@C49,333@C123,333@C54	GIFPVLCK,NTGIICTIGPASR
NP_872270.1|			58.1921		PKM	pyruvate kinase, muscle	15q23					|PKM|5315|P14618|pyruvate kinase isozymes M1/M2 isoform b [Homo sapiens]	333@C49,333@C474
NP_872271.1|			58.1921		PKM	pyruvate kinase, muscle	15q23					|PKM|5315|P14618|pyruvate kinase isozymes M1/M2 isoform b [Homo sapiens]	333@C49,333@C474
NP_001193725.1|			51.0744		PKM	pyruvate kinase, muscle	15q23					|PKM|5315|P14618|pyruvate kinase isozymes M1/M2 isoform c [Homo sapiens]	333@C123,333@C548
NP_001193728.1|			57.6493		PKM	pyruvate kinase, muscle	15q23					|PKM|5315|P14618|pyruvate kinase isozymes M1/M2 isoform f [Homo sapiens]	333@C54,333@C479
NP_002645.3|	320	1	63.8418	377	PKM	pyruvate kinase, muscle	15q23		2	3	4	|PKM|5315|P14618|pyruvate kinase isozymes M1/M2 isoform a [Homo sapiens]	333@C474,333@C49	GIFPVLCK,NTGIICTIGPASR
NP_001193726.1|	320	1	57.3304	378	PKM	pyruvate kinase, muscle	15q23		2	3	4	|PKM|5315|P14618;B4DNK4|pyruvate kinase isozymes M1/M2 isoform d [Homo sapiens]	333@C400,333@C49	GIFPVLCK,NTGIICTIGPASR
NP_000356.1|,NP_001152759.1|	379	2	80.7601	454	TPI1	triosephosphate isomerase 1	12p13.31		2	4	6	|TPI1|7167|P60174|triosephosphate isomerase isoform 2 [Homo sapiens]	333@C67,333@C104,333@C218,333@C255	IAVAAQNCYK,IIYGGSVTGATCK
NP_000356.1|			86.3454		TPI1	triosephosphate isomerase 1	12p13.31					|TPI1|7167|P60174;Q53HE2|triosephosphate isomerase isoform 1 [Homo sapiens]	333@C67,333@C218
NP_001152759.1|			75.1748		TPI1	triosephosphate isomerase 1	12p13.31					|TPI1|7167|P60174|triosephosphate isomerase isoform 2 [Homo sapiens]	333@C104,333@C255
NP_001193496.1|,NP_005522.2|	383	2	14.952	458	IFI16	interferon, gamma-inducible protein 16	1q22		2	3	7	|IFI16|3428|Q16666|gamma-interferon-inducible protein 16 isoform 2 [Homo sapiens]	333@C135,333@C191,333@C623	TVAKCQVTPR,INQLCSQTK
NP_001193496.1|			14.952		IFI16	interferon, gamma-inducible protein 16	1q22					|IFI16|3428|Q16666;B4DJT8;H3BLV7|gamma-interferon-inducible protein 16 isoform 1 [Homo sapiens]	333@C135,333@C623
NP_005522.2|			14.952		IFI16	interferon, gamma-inducible protein 16	1q22					|IFI16|3428|Q16666|gamma-interferon-inducible protein 16 isoform 2 [Homo sapiens]	333@C191,333@C623
NP_005264.2|	642	1	10.2941	821	GNB2	guanine nucleotide binding protein (G protein), beta polypeptide 2	7q21.3-q22.1	WDR	2	2	2	|GNB2|2783|P62879;Q6FHM2|guanine nucleotide-binding protein G(I)/G(S)/G(T) subunit beta-2 [Homo sapiens]	333@C204,333@C148	TFVSGACDASIK,ELPGHTGYLSCCR
NP_006588.1|	128	1	44.1176	883	HSPA8	heat shock 70kDa protein 8	11q24.1	HSP70	2	3	4	|HSPA8|3312|P11142;Q53HF2|heat shock cognate 71 kDa protein isoform 1 [Homo sapiens]	333@C603	ELEKVCNPIITK,VCNPIITK
NP_006421.2|	695	1	17.6252	890	CCT4	chaperonin containing TCP1, subunit 4 (delta)	2p15	CHAP	2	2	3	|CCT4|10575|P50991|T-complex protein 1 subunit delta isoform a [Homo sapiens]	333@C379,333@C410	ITGCASPGK,SIHDALCVIR
NP_001243650.1|	695	1	16.6994	891	CCT4	chaperonin containing TCP1, subunit 4 (delta)	2p15	CHAP	2	2	3	|CCT4|10575|B7Z8B1;F5H5W3|T-complex protein 1 subunit delta isoform b [Homo sapiens]	333@C349,333@C380	ITGCASPGK,SIHDALCVIR
NP_006730.2|	727	1	4.35967	948	MCM5	minichromosome maintenance complex component 5	22q13.1-q13.2		2	2	3	|MCM5|4174|P33992;B1AHB0|DNA replication licensing factor MCM5 [Homo sapiens]	333@C197,333@C566	KCNTDQAGRPK,KFIAYCRVKCGPR
NP_001015.1|	731	1	31.3253	952	RPS21	ribosomal protein S21	20q13.3	RPS	2	3	6	|RPS21|6227|P63220;Q6FGH5|40S ribosomal protein S21 [Homo sapiens]	333@C17,333@C56	KCSASNR,TYAICGAIR
NP_001006.1|	740	1	55.0633	962	RPS11	ribosomal protein S11	19q13.3	RPS	2	2	3	|RPS11|6205|P62280|40S ribosomal protein S11 [Homo sapiens]	333@C116,333@C60	NMSVHLSPCFR,CPFTGNVSIR
NP_004588.1|,NP_808210.2|	481	2	17.7338	975	SNRPD2	small nuclear ribonucleoprotein D2 polypeptide 16.5kDa	19q13.2-q13.3		2	6	17	|SNRPD2|6633|P62316|small nuclear ribonucleoprotein Sm D2 isoform 2 [Homo sapiens]	333@C63,333@C53,333@C46,333@C36	HCNMVLENVK,NNTQVLINCR
NP_004588.1|			16.9492		SNRPD2	small nuclear ribonucleoprotein D2 polypeptide 16.5kDa	19q13.2-q13.3					|SNRPD2|6633|P62316|small nuclear ribonucleoprotein Sm D2 isoform 1 [Homo sapiens]	333@C46,333@C63
NP_808210.2|			18.5185		SNRPD2	small nuclear ribonucleoprotein D2 polypeptide 16.5kDa	19q13.2-q13.3					|SNRPD2|6633|P62316|small nuclear ribonucleoprotein Sm D2 isoform 2 [Homo sapiens]	333@C36,333@C53
NP_001188412.1|	765	1	61.8768	1008	ENO1	enolase 1, (alpha)	1p36.2		2	3	8	|ENO1|2023|P06733;E2DRY6|c-myc promoter-binding protein-1 isoform MBP-1 [Homo sapiens]	333@C306,333@C264	TGAPCR,VNQIGSVTESLQACK
NP_006077.2|	330	1	29.3333	1014	TUBB3	tubulin, beta 3 class III	16q24.3	TUB	2	2	3	|TUBB3|10381|Q13509;Q53G92|tubulin beta-3 chain isoform 1 [Homo sapiens]	333@C303,333@C12	NMMAACDPR,EIVHIQAGQCGNQIGAK
NP_008839.2|,NP_061485.1|	794	2	11.9372	1058	RAC1	ras-related C3 botulinum toxin substrate 1 (rho family, small GTP binding protein Rac1)	7p22	ENDOLIG	2	3	5	|RAC1|5879|P63000;A4D2P0|ras-related C3 botulinum toxin substrate 1 isoform Rac1b [Homo sapiens]	333@C178,333@C197	AVLCPPPVK,AVLCPPPVKK
NP_008839.2|			12.5		RAC1	ras-related C3 botulinum toxin substrate 1 (rho family, small GTP binding protein Rac1)	7p22	ENDOLIG				|RAC1|5879|P63000;A4D2P1|ras-related C3 botulinum toxin substrate 1 isoform Rac1 [Homo sapiens]	333@C178
NP_061485.1|			11.3744		RAC1	ras-related C3 botulinum toxin substrate 1 (rho family, small GTP binding protein Rac1)	7p22	ENDOLIG				|RAC1|5879|P63000;A4D2P0|ras-related C3 botulinum toxin substrate 1 isoform Rac1b [Homo sapiens]	333@C197
NP_705935.1|	505	1	29.0323	1079	TPM3	tropomyosin 3	1q21.2	TPM	2	3	6	|TPM3|7170|P06753|tropomyosin alpha-3 chain isoform 2 [Homo sapiens]	333@C170,333@C233	LMDQNLKCLSAAEEK,EEHLCTQR
NP_001036816.1|	505	1	32.2581	1081	TPM3	tropomyosin 3	1q21.2	TPM	2	2	5	|TPM3|7170|P06753;Q5VU66|tropomyosin alpha-3 chain isoform 4 [Homo sapiens]	333@C154,333@C233	AELAESKCSELEEELKNVTNNLK,EEHLCTQR
NP_000958.1|	790	1	41.1911	1119	RPL3	ribosomal protein L3	22q13	RPL	2	3	5	|RPL3|6122|P39023|60S ribosomal protein L3 isoform a [Homo sapiens]	333@C253,333@C157	VACIGAWHPAR,YCQVIR
NP_031401.1|	854	1	7.00483	1173	TARDBP	TAR DNA binding protein	1p36.22	RBM	2	2	3	|TARDBP|23435|Q13148;Q9H256|TAR DNA-binding protein 43 [Homo sapiens]	333@C50,333@C173,333@C175	NPVSQCMR,WCDCKLPNSK
NP_001010.2|,NP_001025180.1|	875	2	39.2308	1210	RPS15A	ribosomal protein S15a	16p12.3	RPS	2	3	5	|RPS15A|6210|P62244;B2R4W8|40S ribosomal protein S15a [Homo sapiens]	333@C72,333@C30	LNKCGVISPR,QVLIRPCSK
NP_001010.2|			39.2308		RPS15A	ribosomal protein S15a	16p12.3	RPS				|RPS15A|6210|P62244;B2R4W8|40S ribosomal protein S15a [Homo sapiens]	333@C30,333@C72
NP_001025180.1|			39.2308		RPS15A	ribosomal protein S15a	16p12.3	RPS				|RPS15A|6210|P62244;B2R4W8|40S ribosomal protein S15a [Homo sapiens]	333@C30,333@C72
NP_001180343.1|,NP_061816.1|	31	2	28.545	1216	TUBA8	tubulin, alpha 8	22q11	TUB	2	2	2	|TUBA8|51807|Q9NY65|tubulin alpha-8 chain isoform 1 [Homo sapiens]	333@C310,333@C376,333@C281,333@C347	AVCMLSNTTAIAEAWAR,TIQFVDWCPTGFK
NP_001180343.1|			30.8094		TUBA8	tubulin, alpha 8	22q11	TUB				|TUBA8|51807|Q9NY65;B3KPW9|tubulin alpha-8 chain isoform 2 [Homo sapiens]	333@C281,333@C310
NP_061816.1|			26.2806		TUBA8	tubulin, alpha 8	22q11	TUB				|TUBA8|51807|Q9NY65|tubulin alpha-8 chain isoform 1 [Homo sapiens]	333@C347,333@C376
NP_005991.1|	31	1	39.5089	1217	TUBA4A	tubulin, alpha 4a	2q36.1	TUB	2	4	5	|TUBA4A|7277|P68366|tubulin alpha-4A chain [Homo sapiens]	333@C295,333@C376	AYHEQLSVAEITNACFEPANQMVK,AVCMLSNTTAIAEAWAR
NP_817124.1|	330	1	12.1622	1219	TUBB8	tubulin, beta 8 class VIII	10p15.3	TUB	2	2	4	|TUBB8|347688|Q3ZCM7|tubulin beta-8 chain isoform 1 [Homo sapiens]	333@C303,333@C354	NMMAACDPR,TAVCDIPPR
NP_001419.1|	765	1	67.0507	1247	ENO1	enolase 1, (alpha)	1p36.2		2	3	8	|ENO1|2023|P06733|alpha-enolase isoform 1 [Homo sapiens]	333@C399,333@C357	TGAPCR,VNQIGSVTESLQACK
NP_005043.1|	794	1	5.20833	1260	RAC3	ras-related C3 botulinum toxin substrate 3 (rho family, small GTP binding protein Rac3)	17q25.3	ENDOLIG	2	3	5	|RAC3|5881|P60763|ras-related C3 botulinum toxin substrate 3 [Homo sapiens]	333@C178	AVLCPPPVK,AVLCPPPVKK
NP_001158887.1|,NP_001158888.1|	512	2	43.2845	1271	LDHA	lactate dehydrogenase A	11p15.1		2	2	6	|LDHA|3939|P00338|L-lactate dehydrogenase A chain isoform 5 [Homo sapiens]	333@C131,333@C163	YSPNCK,VIGSGCNLDSAR
NP_001158887.1|			40.5109		LDHA	lactate dehydrogenase A	11p15.1					|LDHA|3939|P00338|L-lactate dehydrogenase A chain isoform 4 [Homo sapiens]	333@C131,333@C163
NP_001158888.1|			46.0581		LDHA	lactate dehydrogenase A	11p15.1					|LDHA|3939|P00338|L-lactate dehydrogenase A chain isoform 5 [Homo sapiens]	333@C131,333@C163
NP_005557.1|,NP_001158886.1|	512	2	42.2096	1272	LDHA	lactate dehydrogenase A	11p15.1		2	2	6	|LDHA|3939|P00338|L-lactate dehydrogenase A chain isoform 3 [Homo sapiens]	333@C131,333@C160,333@C163,333@C192	YSPNCK,VIGSGCNLDSAR
NP_005557.1|			43.9759		LDHA	lactate dehydrogenase A	11p15.1					|LDHA|3939|P00338|L-lactate dehydrogenase A chain isoform 1 [Homo sapiens]	333@C131,333@C163
NP_001158886.1|			40.4432		LDHA	lactate dehydrogenase A	11p15.1					|LDHA|3939|P00338|L-lactate dehydrogenase A chain isoform 3 [Homo sapiens]	333@C160,333@C192
NP_001966.1|	765	1	15.8986	1277	ENO2	enolase 2 (gamma, neuronal)	12p13		2	2	5	|ENO2|2026|P09104;Q6FHV6|gamma-enolase [Homo sapiens]	333@C399,333@C337	TGAPCR,ACNCLLLK
NP_066953.1|	2	1	70.303	2	PPIA	peptidylprolyl isomerase A (cyclophilin A)	7p13		1	1	1	|PPIA|5478|P62937;A8K220|peptidyl-prolyl cis-trans isomerase A [Homo sapiens]	333@C62	IIPGFMCQGGDFTR
NP_003409.1|,NP_001120664.1|,NP_001120665.1|,NP_001120666.1|,NP_001120667.1|,NP_001120668.1|	7	6	8.59964	7	CNBP	CCHC-type zinc finger, nucleic acid binding protein	3q21	ZCCHC	1	2	2	|CNBP|7555|P62633|cellular nucleic acid-binding protein isoform 6 [Homo sapiens]	333@C98,333@C100,333@C99,333@C93,333@C92,333@C91,333@C97,333@C90	EQCCYNCGKPGHLAR
NP_003409.1|			8.47458		CNBP	CCHC-type zinc finger, nucleic acid binding protein	3q21	ZCCHC				|CNBP|7555|P62633|cellular nucleic acid-binding protein isoform 3 [Homo sapiens]	333@C98,333@C97
NP_001120664.1|			8.37989		CNBP	CCHC-type zinc finger, nucleic acid binding protein	3q21	ZCCHC				|CNBP|7555|A8K7V4;E9PDR7|cellular nucleic acid-binding protein isoform 1 [Homo sapiens]	333@C100,333@C99
NP_001120665.1|			8.42697		CNBP	CCHC-type zinc finger, nucleic acid binding protein	3q21	ZCCHC				|CNBP|7555|P62633|cellular nucleic acid-binding protein isoform 2 [Homo sapiens]	333@C99,333@C98
NP_001120666.1|			8.72093		CNBP	CCHC-type zinc finger, nucleic acid binding protein	3q21	ZCCHC				|CNBP|7555|P62633|cellular nucleic acid-binding protein isoform 4 [Homo sapiens]	333@C93,333@C92
NP_001120667.1|			8.77193		CNBP	CCHC-type zinc finger, nucleic acid binding protein	3q21	ZCCHC				|CNBP|7555|Q4JGY1|cellular nucleic acid-binding protein isoform 5 [Homo sapiens]	333@C92,333@C91
NP_001120668.1|			8.82353		CNBP	CCHC-type zinc finger, nucleic acid binding protein	3q21	ZCCHC				|CNBP|7555|P62633|cellular nucleic acid-binding protein isoform 6 [Homo sapiens]	333@C91,333@C90
NP_000966.2|,NP_001186731.1|	8	2	25.3523	8	RPL11	ribosomal protein L11	1p36.1-p35	RPL	1	1	2	|RPL11|6135|P62913|60S ribosomal protein L11 isoform 2 [Homo sapiens]	333@C72,333@C71	IAVHCTVR
NP_000966.2|			25.2809		RPL11	ribosomal protein L11	1p36.1-p35	RPL				|RPL11|6135|P62913;Q5VVD0|60S ribosomal protein L11 isoform 1 [Homo sapiens]	333@C72
NP_001186731.1|			25.4237		RPL11	ribosomal protein L11	1p36.1-p35	RPL				|RPL11|6135|P62913|60S ribosomal protein L11 isoform 2 [Homo sapiens]	333@C71
NP_001018077.1|,NP_001018079.1|	9	2	27.4753	9	SERBP1	SERPINE1 mRNA binding protein 1	1p31		1	2	5	|SERBP1|26135|Q8NC51|plasminogen activator inhibitor 1 RNA-binding protein isoform 3 [Homo sapiens]	333@C11	PGHLQEGFGCVVTNR
NP_001018077.1|			26.9608		SERBP1	SERPINE1 mRNA binding protein 1	1p31					|SERBP1|26135|Q8NC51|plasminogen activator inhibitor 1 RNA-binding protein isoform 1 [Homo sapiens]	333@C11
NP_001018079.1|			27.9898		SERBP1	SERPINE1 mRNA binding protein 1	1p31					|SERBP1|26135|Q8NC51|plasminogen activator inhibitor 1 RNA-binding protein isoform 3 [Homo sapiens]	333@C11
NP_001018078.1|,NP_056455.3|	9	2	25.3577	10	SERBP1	SERPINE1 mRNA binding protein 1	1p31		1	2	5	|SERBP1|26135|Q8NC51;Q5VU21;Q63HR1|plasminogen activator inhibitor 1 RNA-binding protein isoform 4 [Homo sapiens]	333@C11	PGHLQEGFGCVVTNR
NP_001018078.1|			24.8756		SERBP1	SERPINE1 mRNA binding protein 1	1p31					|SERBP1|26135|Q8NC51|plasminogen activator inhibitor 1 RNA-binding protein isoform 2 [Homo sapiens]	333@C11
NP_056455.3|			25.8398		SERBP1	SERPINE1 mRNA binding protein 1	1p31					|SERBP1|26135|Q8NC51;Q5VU21;Q63HR1|plasminogen activator inhibitor 1 RNA-binding protein isoform 4 [Homo sapiens]	333@C11
NP_003277.1|	11	1	15.4248	12	TOP1	topoisomerase (DNA) I	20q12-q13.1		1	1	1	|TOP1|7150|P11387|DNA topoisomerase 1 [Homo sapiens]	333@C630	AVAILCNHQR
NP_006817.1|	19	1	48.9796	21	YWHAQ	tyrosine 3-monooxygenase/tryptophan 5-monooxygenase activation protein, theta	2p25.2-p25.1		1	2	4	|YWHAQ|10971|P27348|14-3-3 protein theta [Homo sapiens]	333@C134	YLAEVACGDDRK
NP_001137502.1|	29	1	3.46275	32	NAT10	N-acetyltransferase 10 (GCN5-related)	11p13		1	2	3	|NAT10|55226|Q9H0A0;B4DFD5|N-acetyltransferase 10 isoform b [Homo sapiens]	333@C33	YCYYNETHK
XP_003846706.1|	31	1	34.3195	34	Unmapped_XP_003846706.1|				1	1	1	|LOC100996887|100996887|-|PREDICTED: tubulin alpha-3E chain-like [Homo sapiens]	333@C95	AVCMLSNTTAIAEAWAR
NP_659400.2|	41	1	1.43198	45	FAM91A1	family with sequence similarity 91, member A1	8q24.13		1	1	2	|FAM91A1|157769|Q658Y4|protein FAM91A1 [Homo sapiens]	333@C191	ICTLPEKCAVDK
NP_003555.1|	44	1	26.1307	48	TAGLN2	transgelin 2	1q21-q25		1	2	4	|TAGLN2|8407|P37802;E9KL39|transgelin-2 [Homo sapiens]	333@C124	NMACVQR
NP_006592.3|	51	1	21.25	56	PTGES3	prostaglandin E synthase 3 (cytosolic)	12q13.13		1	1	1	|PTGES3|10728|Q15185|prostaglandin E synthase 3 [Homo sapiens]	333@C75	SILCCLR
NP_005993.1|	53	1	13.0435	58	UCHL3	ubiquitin carboxyl-terminal esterase L3 (ubiquitin thiolesterase)	13q21.33		1	1	2	|UCHL3|7347|P15374|ubiquitin carboxyl-terminal hydrolase isozyme L3 [Homo sapiens]	333@C95	QTISNACGTIGLIHAIANNK
NP_060531.2|	64	1	2.1978	78	PRPF38B	pre-mRNA processing factor 38B	1p13.3		1	1	2	|PRPF38B|55119|Q5VTL8;Q69YH0|pre-mRNA-splicing factor 38B [Homo sapiens]	333@C113	TAGQTGMCGGVR
NP_002785.1|	65	1	12.9353	79	PSMB2	proteasome (prosome, macropain) subunit, beta type, 2	1p34.2	PSM	1	2	3	|PSMB2|5690|P49721|proteasome subunit beta type-2 isoform 1 [Homo sapiens]	333@C163	KCLEELQK
NP_005889.3|,NP_976240.1|	72	2	1.42568	87	CAPRIN1	cell cycle associated protein 1	11p13		1	2	3	|CAPRIN1|4076|Q14444|caprin-1 isoform 2 [Homo sapiens]	333@C226	EKPVCGTTYK
NP_005889.3|			1.41044		CAPRIN1	cell cycle associated protein 1	11p13					|CAPRIN1|4076|Q14444|caprin-1 isoform 1 [Homo sapiens]	333@C226
NP_976240.1|			1.44092		CAPRIN1	cell cycle associated protein 1	11p13					|CAPRIN1|4076|Q14444|caprin-1 isoform 2 [Homo sapiens]	333@C226
NP_002379.3|,NP_001257401.1|	89	2	2.0356	104	MCM3	minichromosome maintenance complex component 3	6p12		1	1	1	|MCM3|4172|-|DNA replication licensing factor MCM3 isoform 2 [Homo sapiens]	333@C405,333@C370	YVLCTAPR
NP_002379.3|			1.99297		MCM3	minichromosome maintenance complex component 3	6p12					|MCM3|4172|-|DNA replication licensing factor MCM3 isoform 1 [Homo sapiens]	333@C405
NP_001257401.1|			2.07824		MCM3	minichromosome maintenance complex component 3	6p12					|MCM3|4172|-|DNA replication licensing factor MCM3 isoform 2 [Homo sapiens]	333@C370
NP_004386.2|,NP_543157.1|	95	2	7.38463	111	DBN1	drebrin 1	5q35.3		1	1	1	|DBN1|1627|Q16643|drebrin isoform b [Homo sapiens]	333@C96,333@C98	KCACASHVAK
NP_004386.2|			7.39599		DBN1	drebrin 1	5q35.3					|DBN1|1627|Q16643|drebrin isoform a [Homo sapiens]	333@C96
NP_543157.1|			7.37327		DBN1	drebrin 1	5q35.3					|DBN1|1627|Q16643|drebrin isoform b [Homo sapiens]	333@C98
NP_001000.2|	101	1	26.4706	117	RPS5	ribosomal protein S5	19q13.4	RPS	1	1	1	|RPS5|6193|P46782|40S ribosomal protein S5 [Homo sapiens]	333@C66	KAQCPIVER
NP_003482.1|,NP_001243048.1|,NP_001243049.1|	107	3	9.65623	123	NAA10	N(alpha)-acetyltransferase 10, NatA catalytic subunit	Xq28	NAA	1	1	1	|NAA10|8260|B7Z9N2|N-alpha-acetyltransferase 10 isoform 3 [Homo sapiens]	333@C194,333@C179,333@C188	GNSPPSSGEACR
NP_003482.1|			9.3617		NAA10	N(alpha)-acetyltransferase 10, NatA catalytic subunit	Xq28	NAA				|NAA10|8260|P41227|N-alpha-acetyltransferase 10 isoform 1 [Homo sapiens]	333@C194
NP_001243048.1|			10		NAA10	N(alpha)-acetyltransferase 10, NatA catalytic subunit	Xq28	NAA				|NAA10|8260|A6NM98|N-alpha-acetyltransferase 10 isoform 2 [Homo sapiens]	333@C179
NP_001243049.1|			9.60699		NAA10	N(alpha)-acetyltransferase 10, NatA catalytic subunit	Xq28	NAA				|NAA10|8260|B7Z9N2|N-alpha-acetyltransferase 10 isoform 3 [Homo sapiens]	333@C188
NP_001230587.1|,NP_001230588.1|,NP_002055.1|,NP_001112362.1|	114	4	16.9811	130	GLRX	glutaredoxin (thioltransferase)	5q14		1	1	2	|GLRX|2745|P35754|glutaredoxin-1 [Homo sapiens]	333@C26	PTCPYCR
NP_001230587.1|			16.9811		GLRX	glutaredoxin (thioltransferase)	5q14					|GLRX|2745|P35754|glutaredoxin-1 [Homo sapiens]	333@C26
NP_001230588.1|			16.9811		GLRX	glutaredoxin (thioltransferase)	5q14					|GLRX|2745|P35754|glutaredoxin-1 [Homo sapiens]	333@C26
NP_002055.1|			16.9811		GLRX	glutaredoxin (thioltransferase)	5q14					|GLRX|2745|P35754|glutaredoxin-1 [Homo sapiens]	333@C26
NP_001112362.1|			16.9811		GLRX	glutaredoxin (thioltransferase)	5q14					|GLRX|2745|P35754|glutaredoxin-1 [Homo sapiens]	333@C26
NP_078938.2|	29	1	4.09756	132	NAT10	N-acetyltransferase 10 (GCN5-related)	11p13		1	2	3	|NAT10|55226|Q9H0A0|N-acetyltransferase 10 isoform a [Homo sapiens]	333@C105	YCYYNETHK
NP_068814.2|	128	1	17.3709	147	HSPA2	heat shock 70kDa protein 2	14q23	HSP70	1	1	1	|HSPA2|3306|P54652|heat shock-related 70 kDa protein 2 [Homo sapiens]	333@C18	GPAIGIDLGTTYSCVGVFQHGK
NP_061156.1|	138	1	1.6129	161	CMAS	cytidine monophosphate N-acetylneuraminic acid synthetase	12p12.1		1	1	2	|CMAS|55907|Q8NFW8|N-acylneuraminate cytidylyltransferase [Homo sapiens]	333@C432	VNNSCQK
NP_001022.1|	168	1	37.6812	195	RPS28	ribosomal protein S28	19p13.2	RPS	1	1	2	|RPS28|6234|P62857;B2R4R9|40S ribosomal protein S28 [Homo sapiens]	333@C27	TGSQGQCTQVR
NP_006280.3|	169	1	4.17159	196	TLN1	talin 1	9p23-p21		1	1	1	|TLN1|7094|Q9Y490|talin-1 [Homo sapiens]	333@C2196	AVAAGNSCR
NP_005156.1|	10	1	17.3077	202	ALDOC	aldolase C, fructose-bisphosphate	17q11.2		1	2	2	|ALDOC|230|P09972|fructose-bisphosphate aldolase C [Homo sapiens]	333@C202	RCQYVTEK
NP_612403.2|,NP_001136122.1|	174	2	1.29753	206	HNRNPLL	heterogeneous nuclear ribonucleoprotein L-like	2p22	RBM	1	1	2	|HNRPLL|92906|Q8WVV9;A8K894|heterogeneous nuclear ribonucleoprotein L-like isoform 2 [Homo sapiens]	333@C405,333@C400	LNVCVSK
NP_612403.2|			1.29151		HNRNPLL	heterogeneous nuclear ribonucleoprotein L-like	2p22	RBM				|HNRPLL|92906|Q8WVV9|heterogeneous nuclear ribonucleoprotein L-like isoform 1 [Homo sapiens]	333@C405
NP_001136122.1|			1.30354		HNRNPLL	heterogeneous nuclear ribonucleoprotein L-like	2p22	RBM				|HNRPLL|92906|Q8WVV9;A8K894|heterogeneous nuclear ribonucleoprotein L-like isoform 2 [Homo sapiens]	333@C400
NP_002650.1|,NP_001005377.1|	191	2	7.39835	227	PLAUR	plasminogen activator, urokinase receptor	19q13	CD	1	1	1	|PLAUR|5329|Q03405|urokinase plasminogen activator surface receptor isoform 3 precursor [Homo sapiens]	333@C137	HQSLQCR
NP_002650.1|			6.86567		PLAUR	plasminogen activator, urokinase receptor	19q13	CD				|PLAUR|5329|Q03405|urokinase plasminogen activator surface receptor isoform 1 precursor [Homo sapiens]	333@C137
NP_001005377.1|			7.93103		PLAUR	plasminogen activator, urokinase receptor	19q13	CD				|PLAUR|5329|Q03405|urokinase plasminogen activator surface receptor isoform 3 precursor [Homo sapiens]	333@C137
NP_004485.1|	198	1	7.91667	234	HDGF	hepatoma-derived growth factor	1q23.1		1	2	2	|HDGF|3068|P51858|hepatoma-derived growth factor isoform a [Homo sapiens]	333@C12	EYKCGDLVFAK
NP_003592.3|	201	1	2.18631	237	SMARCA5	SWI/SNF related, matrix associated, actin dependent regulator of chromatin, subfamily a, member 5	4q31.1-q31.2		1	1	2	|SMARCA5|8467|O60264|SWI/SNF-related matrix-associated actin-dependent regulator of chromatin subfamily A member 5 [Homo sapiens]	333@C165	ATNVCTR
XXX_NP_659415.1|	204	1		240	Unmapped_XXX_NP_659415.1|				1	2	5			KQLEEAFKQQAATECQLK
NP_002147.2|,NP_955472.1|	213	2	73.2984	249	HSPD1	heat shock 60kDa protein 1 (chaperonin)	2q33.1	CHAP	1	2	3	|HSPD1|3329|P10809|60 kDa heat shock protein, mitochondrial [Homo sapiens]	333@C442	AAVEEGIVLGGGCALLR
NP_002147.2|			73.2984		HSPD1	heat shock 60kDa protein 1 (chaperonin)	2q33.1	CHAP				|HSPD1|3329|P10809|60 kDa heat shock protein, mitochondrial [Homo sapiens]	333@C442
NP_955472.1|			73.2984		HSPD1	heat shock 60kDa protein 1 (chaperonin)	2q33.1	CHAP				|HSPD1|3329|P10809|60 kDa heat shock protein, mitochondrial [Homo sapiens]	333@C442
NP_005023.2|,NP_001165806.1|,NP_001129497.1|	224	3	6.92727	260	PLS3	plastin 3	Xq23	EFHAND	1	2	2	|PLS3|5358|P13797;A8K579|plastin-3 isoform 1 [Homo sapiens]	333@C463,333@C436	KLENCNYAVELGK
NP_005023.2|			6.8254		PLS3	plastin 3	Xq23	EFHAND				|PLS3|5358|P13797;A8K579|plastin-3 isoform 1 [Homo sapiens]	333@C463
NP_001165806.1|			7.13101		PLS3	plastin 3	Xq23	EFHAND				|PLS3|5358|B4DPW9|plastin-3 isoform 2 [Homo sapiens]	333@C436
NP_001129497.1|			6.8254		PLS3	plastin 3	Xq23	EFHAND				|PLS3|5358|P13797;A8K579|plastin-3 isoform 1 [Homo sapiens]	333@C463
NP_115766.3|	227	1	2.38908	263	NIFK	nucleolar protein interacting with the FHA domain of MKI67	2q14.3	RBM	1	1	2	|MKI67IP|84365|Q9BYG3|MKI67 FHA domain-interacting nucleolar phosphoprotein [Homo sapiens]	333@C269	QPISCVK
NP_002861.1|	240	1	15.2709	277	RAB13	RAB13, member RAS oncogene family	1q21.2	RAB	1	1	1	|RAB13|5872|P51153|ras-related protein Rab-13 [Homo sapiens]	333@C123	LLLGNKCDMEAK
XXX_NP_112238.1|	247	1		286	Unmapped_XXX_NP_112238.1|				1	1	2			LCCCPRCCCPR
XXX_NP_008823.1|	249	1		289	Unmapped_XXX_NP_008823.1|				1	1	2			LVGHCR
NP_000986.2|,NP_296374.1|	256	2	46.1538	297	RPL34	ribosomal protein L34	4q25	RPL	1	2	3	|RPL34|6164|P49207|60S ribosomal protein L34 [Homo sapiens]	333@C83	AYGGSMCAK
NP_000986.2|			46.1538		RPL34	ribosomal protein L34	4q25	RPL				|RPL34|6164|P49207|60S ribosomal protein L34 [Homo sapiens]	333@C83
NP_296374.1|			46.1538		RPL34	ribosomal protein L34	4q25	RPL				|RPL34|6164|P49207|60S ribosomal protein L34 [Homo sapiens]	333@C83
XXX_NP_001096637.1|	259	1		300	Unmapped_XXX_NP_001096637.1|				1	2	2			KPQVNKRPVLWCSSCR
NP_008977.1|	269	1	0.885827	310	EMILIN1	elastin microfibril interfacer 1	2p23.3-p23.2	EMID	1	1	2	|EMILIN1|11117|Q9Y6C2|EMILIN-1 precursor [Homo sapiens]	333@C602	CSCPLLPPR
NP_001524.2|,NP_001005335.1|	174	2	15.174	341	HNRNPL	heterogeneous nuclear ribonucleoprotein L	19q13.2	RBM	1	1	2	|HNRNPL|3191|P14866;A6NIT8;Q6NTA2|heterogeneous nuclear ribonucleoprotein L isoform b [Homo sapiens]	333@C452,333@C319	LNVCVSK
NP_001524.2|			13.2428		HNRNPL	heterogeneous nuclear ribonucleoprotein L	19q13.2	RBM				|HNRNPL|3191|P14866;Q6NTA2|heterogeneous nuclear ribonucleoprotein L isoform a [Homo sapiens]	333@C452
NP_001005335.1|			17.1053		HNRNPL	heterogeneous nuclear ribonucleoprotein L	19q13.2	RBM				|HNRNPL|3191|P14866;A6NIT8;Q6NTA2|heterogeneous nuclear ribonucleoprotein L isoform b [Homo sapiens]	333@C319
NP_004921.1|,NP_001193469.1|	294	2	25.503	343	CAPZB	capping protein (actin filament) muscle Z-line, beta	1p36.1		1	2	4	|CAPZB|832|P47756;Q7L4N0|F-actin-capping protein subunit beta isoform 2 [Homo sapiens]	333@C206	QMEKDETVSDCSPHIANIGR
NP_004921.1|			25.7353		CAPZB	capping protein (actin filament) muscle Z-line, beta	1p36.1					|CAPZB|832|P47756;Q7L4N0|F-actin-capping protein subunit beta isoform 1 [Homo sapiens]	333@C206
NP_001193469.1|			25.2708		CAPZB	capping protein (actin filament) muscle Z-line, beta	1p36.1					|CAPZB|832|P47756;Q7L4N0|F-actin-capping protein subunit beta isoform 2 [Homo sapiens]	333@C206
NP_001164014.1|,NP_001164015.1|,NP_612642.2|	296	3	11.2158	345	PGAM5	phosphoglycerate mutase family member 5	12q24.33		1	1	1	|PGAM5|192111|Q96HS1|serine/threonine-protein phosphatase PGAM5, mitochondrial isoform 3 [Homo sapiens]	333@C168	HLPGVCK
NP_001164014.1|			10.7266		PGAM5	phosphoglycerate mutase family member 5	12q24.33					|PGAM5|192111|Q96HS1;A9LN06|serine/threonine-protein phosphatase PGAM5, mitochondrial isoform 1 [Homo sapiens]	333@C168
NP_001164015.1|			10.7639		PGAM5	phosphoglycerate mutase family member 5	12q24.33					|PGAM5|192111|-|serine/threonine-protein phosphatase PGAM5, mitochondrial isoform 2 [Homo sapiens]	333@C168
NP_612642.2|			12.1569		PGAM5	phosphoglycerate mutase family member 5	12q24.33					|PGAM5|192111|Q96HS1|serine/threonine-protein phosphatase PGAM5, mitochondrial isoform 3 [Homo sapiens]	333@C168
NP_054733.2|	300	1	3.08989	351	SNRNP200	small nuclear ribonucleoprotein 200kDa (U5)	2q11.2		1	1	1	|SNRNP200|23020|O75643|U5 small nuclear ribonucleoprotein 200 kDa helicase [Homo sapiens]	333@C1127	MWQSMCPLR
NP_001153145.1|,NP_001240700.1|	137	2	12.634	366	SYNCRIP	synaptotagmin binding, cytoplasmic RNA interacting protein	6q14-q15	RBM	1	1	1	|SYNCRIP|10492|O60506;Q59GL1|heterogeneous nuclear ribonucleoprotein Q isoform 7 [Homo sapiens]	333@C139,333@C85	HIGVCISVANNR
NP_001153145.1|			11.8534		SYNCRIP	synaptotagmin binding, cytoplasmic RNA interacting protein	6q14-q15	RBM				|SYNCRIP|10492|O60506;B7Z645;Q59GL1|heterogeneous nuclear ribonucleoprotein Q isoform 2 [Homo sapiens]	333@C139
NP_001240700.1|			13.4146		SYNCRIP	synaptotagmin binding, cytoplasmic RNA interacting protein	6q14-q15	RBM				|SYNCRIP|10492|O60506;Q59GL1|heterogeneous nuclear ribonucleoprotein Q isoform 7 [Homo sapiens]	333@C85
NP_001952.1|	319	1	48.7179	375	EEF2	eukaryotic translation elongation factor 2	19p13.3		1	1	1	|EEF2|1938|P13639|elongation factor 2 [Homo sapiens]	333@C67	KDEQERCITIK
NP_115914.1|	330	1	9.86547	397	TUBB6	tubulin, beta 6 class V	18p11.21	TUB	1	1	2	|TUBB6|84617|Q9BUF5|tubulin beta-6 chain [Homo sapiens]	333@C303	NMMAACDPR
NP_054862.1|	332	1	7.24138	399	CD274	CD274 molecule	9p24.1	ENDOLIG	1	2	4	|CD274|29126|Q9NZQ7|programmed cell death 1 ligand 1 isoform a precursor [Homo sapiens]	333@C272	KCGIQDTNSK
NP_036256.2|,NP_001137545.1|	335	2	12.4139	402	CHORDC1	cysteine and histidine-rich domain (CHORD) containing 1	11q14.3		1	1	2	|CHORDC1|26973|Q9UHD1|cysteine and histidine-rich domain-containing protein 1 isoform b [Homo sapiens]	333@C86,333@C67	ELCELKPK
NP_036256.2|			12.0482		CHORDC1	cysteine and histidine-rich domain (CHORD) containing 1	11q14.3					|CHORDC1|26973|Q9UHD1|cysteine and histidine-rich domain-containing protein 1 isoform a [Homo sapiens]	333@C86
NP_001137545.1|			12.7796		CHORDC1	cysteine and histidine-rich domain (CHORD) containing 1	11q14.3					|CHORDC1|26973|Q9UHD1|cysteine and histidine-rich domain-containing protein 1 isoform b [Homo sapiens]	333@C67
NP_001279.2|	341	1	34.8548	409	CLIC1	chloride intracellular channel 1	6p21.3	CLIC	1	1	1	|CLIC1|1192|O00299;Q5SRT3|chloride intracellular channel protein 1 [Homo sapiens]	333@C24	IGNCPFSQR
NP_003741.1|	348	1	8.32127	417	EIF3A	eukaryotic translation initiation factor 3, subunit A	10q26.11		1	1	2	|EIF3A|8661|Q14152|eukaryotic translation initiation factor 3 subunit A [Homo sapiens]	333@C478	HCDLQVR
NP_005325.2|	358	1	2.01474	427	HCFC1	host cell factor C1	Xq28		1	1	1	|HCFC1|3054|P51610|host cell factor 1 [Homo sapiens]	333@C1872	VAGINACGR
NP_000909.2|	372	1	24.8031	444	P4HB	prolyl 4-hydroxylase, beta polypeptide	17q25	PDI	1	1	1	|P4HB|5034|P07237|protein disulfide-isomerase precursor [Homo sapiens]	333@C343	ITEFCHR
NP_002818.1|	373	1	7.12644	445	PTPN1	protein tyrosine phosphatase, non-receptor type 1	20q13.1-q13.2	PTPN	1	1	1	|PTPN1|5770|P18031;A8K3M3|tyrosine-protein phosphatase non-receptor type 1 [Homo sapiens]	333@C215	ESGSLSPEHGPVVVHCSAGIGR
NP_004598.1|	386	1	17.5926	461	TBCA	tubulin folding cofactor A	5q14.1		1	2	4	|TBCA|6902|O75347;Q6FGD7|tubulin-specific chaperone A [Homo sapiens]	333@C67	MMIPDCQRR
NP_000652.2|,NP_001020092.1|	390	2	25.5208	465	RPL9	ribosomal protein L9	4p13	RPL	1	1	2	|RPL9|6133|P32969;Q53Z07|60S ribosomal protein L9 [Homo sapiens]	333@C134	MRPGVACSVSQAQK
NP_000652.2|			25.5208		RPL9	ribosomal protein L9	4p13	RPL				|RPL9|6133|P32969;Q53Z07|60S ribosomal protein L9 [Homo sapiens]	333@C134
NP_001020092.1|			25.5208		RPL9	ribosomal protein L9	4p13	RPL				|RPL9|6133|P32969;Q53Z07|60S ribosomal protein L9 [Homo sapiens]	333@C134
NP_001020419.1|,NP_001939.1|,NP_001020420.1|	391	3	20.0177	466	DUT	deoxyuridine triphosphatase	15q21.1		1	1	1	|DUT|1854|P33316|deoxyuridine 5'-triphosphate nucleotidohydrolase, mitochondrial isoform 3 [Homo sapiens]	333@C222,333@C134,333@C111	IAQLICER
NP_001020419.1|			13.8889		DUT	deoxyuridine triphosphatase	15q21.1					|DUT|1854|P33316|deoxyuridine 5'-triphosphate nucleotidohydrolase, mitochondrial isoform 1 precursor [Homo sapiens]	333@C222
NP_001939.1|			21.3415		DUT	deoxyuridine triphosphatase	15q21.1					|DUT|1854|P33316|deoxyuridine 5'-triphosphate nucleotidohydrolase, mitochondrial isoform 2 [Homo sapiens]	333@C134
NP_001020420.1|			24.8227		DUT	deoxyuridine triphosphatase	15q21.1					|DUT|1854|P33316|deoxyuridine 5'-triphosphate nucleotidohydrolase, mitochondrial isoform 3 [Homo sapiens]	333@C111
NP_002038.2|	401	1	8.52503	478	GARS	glycyl-tRNA synthetase	7p15	aaRS2	1	4	7	|GARS|2617|P41250|glycine--tRNA ligase precursor [Homo sapiens]	333@C466,333@C471	SCYDLSCHAR
NP_037450.2|	402	1	0.538358	479	PRRC2B	proline-rich coiled-coil 2B	9q34.13		1	1	2	|PRRC2B|84726|Q5JSZ5;Q9BU62|protein PRRC2B [Homo sapiens]	333@C1174	KGDCRDSWRSNK
NP_004955.2|	406	1	3.94191	483	HDAC1	histone deacetylase 1	1p34		1	2	5	|HDAC1|3065|Q13547;Q6IT96|histone deacetylase 1 [Homo sapiens]	333@C408	ISICSSDKR
NP_009193.2|,NP_001116849.1|	407	2	38.6243	484	PARK7	parkinson protein 7	1p36.23	PARK	1	1	2	|PARK7|11315|Q99497|protein DJ-1 [Homo sapiens]	333@C106	GLIAAICAGPTALLAHEIGFGSK
NP_009193.2|			38.6243		PARK7	parkinson protein 7	1p36.23	PARK				|PARK7|11315|Q99497|protein DJ-1 [Homo sapiens]	333@C106
NP_001116849.1|			38.6243		PARK7	parkinson protein 7	1p36.23	PARK				|PARK7|11315|Q99497|protein DJ-1 [Homo sapiens]	333@C106
NP_008835.5|,NP_001075109.1|	409	2	5.51984	486	PRKDC	protein kinase, DNA-activated, catalytic polypeptide	8q11		1	1	1	|PRKDC|5591|P78527|DNA-dependent protein kinase catalytic subunit isoform 2 [Homo sapiens]	333@C223	LPVLAGCLK
NP_008835.5|			5.49903		PRKDC	protein kinase, DNA-activated, catalytic polypeptide	8q11					|PRKDC|5591|P78527|DNA-dependent protein kinase catalytic subunit isoform 1 [Homo sapiens]	333@C223
NP_001075109.1|			5.54064		PRKDC	protein kinase, DNA-activated, catalytic polypeptide	8q11					|PRKDC|5591|P78527|DNA-dependent protein kinase catalytic subunit isoform 2 [Homo sapiens]	333@C223
NP_055874.2|	169	1	0.668765	491	TLN2	talin 2	15q15-q21		1	1	1	|TLN2|83660|Q9Y4G6|talin-2 [Homo sapiens]	333@C2197	AVAAGNSCR
NP_001153239.1|,NP_054757.1|	421	2	4.53461	500	BZW2	basic leucine zipper and W2 domains 2	7p21.3		1	1	1	|BZW2|28969|Q9Y6E2|basic leucine zipper and W2 domain-containing protein 2 [Homo sapiens]	333@C270	LSQECPIK
NP_001153239.1|			4.53461		BZW2	basic leucine zipper and W2 domains 2	7p21.3					|BZW2|28969|Q9Y6E2|basic leucine zipper and W2 domain-containing protein 2 [Homo sapiens]	333@C270
NP_054757.1|			4.53461		BZW2	basic leucine zipper and W2 domains 2	7p21.3					|BZW2|28969|Q9Y6E2|basic leucine zipper and W2 domain-containing protein 2 [Homo sapiens]	333@C270
NP_973726.2|,NP_004621.2|,NP_973724.1|,NP_973727.1|,NP_001171501.1|,NP_001171502.1|	426	6	5.56789	505	SF1	splicing factor 1	11q13	ZCCHC	1	1	1	|SF1|7536|Q15637;B7Z1Q1;C9JJE2|splicing factor 1 isoform 5 [Homo sapiens]	333@C171,333@C296,333@C145	NIEKECNAK
NP_973726.2|			5.95447		SF1	splicing factor 1	11q13	ZCCHC				|SF1|7536|Q15637|splicing factor 1 isoform 4 [Homo sapiens]	333@C171
NP_004621.2|			5.32081		SF1	splicing factor 1	11q13	ZCCHC				|SF1|7536|Q15637|splicing factor 1 isoform 1 [Homo sapiens]	333@C171
NP_973724.1|			5.32915		SF1	splicing factor 1	11q13	ZCCHC				|SF1|7536|Q15637|splicing factor 1 isoform 2 [Homo sapiens]	333@C171
NP_973727.1|			6.20438		SF1	splicing factor 1	11q13	ZCCHC				|SF1|7536|Q15637|splicing factor 1 isoform 3 [Homo sapiens]	333@C171
NP_001171501.1|			5.05201		SF1	splicing factor 1	11q13	ZCCHC				|SF1|7536|Q15637|splicing factor 1 isoform 6 [Homo sapiens]	333@C296
NP_001171502.1|			5.54649		SF1	splicing factor 1	11q13	ZCCHC				|SF1|7536|Q15637;B7Z1Q1;C9JJE2|splicing factor 1 isoform 5 [Homo sapiens]	333@C145
NP_000997.1|	427	1	57.9545	507	RPS3A	ribosomal protein S3A	4q31.2-q31.3	RPS	1	2	3	|RPS3A|6189|P61247|40S ribosomal protein S3a isoform 1 [Homo sapiens]	333@C111	DKMCSMVK
NP_001243064.1|	430	1	5.2459	510	CSE1L	CSE1 chromosome segregation 1-like (yeast)	20q13	XPO	1	1	1	|CSE1L|1434|P55060;A3RLL6;F8W904|exportin-2 isoform 2 [Homo sapiens]	333@C883	LSTACPGR
NP_001307.2|	430	1	6.28218	511	CSE1L	CSE1 chromosome segregation 1-like (yeast)	20q13	XPO	1	1	1	|CSE1L|1434|P55060|exportin-2 isoform 1 [Homo sapiens]	333@C939	LSTACPGR
NP_001137485.1|,NP_001157935.1|,NP_872394.2|,NP_115636.1|,NP_005045.2|,NP_001032955.1|,NP_001116835.1|	437	7	1.08209	521	RGPD6	RANBP2-like and GRIP domain containing 6	2q13	TTC	1	1	1	|RGPD6|729540|Q99666|RANBP2-like and GRIP domain-containing protein 5/6 isoform 1 [Homo sapiens]	333@C525	QLCTERQK
NP_001137485.1|			0.853242		RGPD3	RANBP2-like and GRIP domain containing 3	2q12.2	TTC				|RGPD3|653489|A6NKT7|ranBP2-like and GRIP domain-containing protein 3 [Homo sapiens]	333@C525
NP_001157935.1|			0.849858		RGPD8	RANBP2-like and GRIP domain containing 8	2q13	TTC				|RGPD8|727851|O14715|RANBP2-like and GRIP domain-containing protein 8 [Homo sapiens]	333@C525
NP_872394.2|			0.853242		RGPD4	RANBP2-like and GRIP domain containing 4	2q12.3	TTC				|RGPD4|285190|Q7Z3J3|ranBP2-like and GRIP domain-containing protein 4 [Homo sapiens]	333@C525
NP_115636.1|			1.65929		RGPD5	RANBP2-like and GRIP domain containing 5	2q13	TTC				|RGPD5|84220|Q99666|RANBP2-like and GRIP domain-containing protein 5/6 isoform 2 [Homo sapiens]	333@C525
NP_005045.2|			0.849858		RGPD5	RANBP2-like and GRIP domain containing 5	2q13	TTC				|RGPD5|84220|Q99666|RANBP2-like and GRIP domain-containing protein 5/6 isoform 1 [Homo sapiens]	333@C525
NP_001032955.1|			1.65929		RGPD6	RANBP2-like and GRIP domain containing 6	2q13	TTC				|RGPD6|729540|Q99666|RANBP2-like and GRIP domain-containing protein 5/6 isoform 2 [Homo sapiens]	333@C525
NP_001116835.1|			0.849858		RGPD6	RANBP2-like and GRIP domain containing 6	2q13	TTC				|RGPD6|729540|Q99666|RANBP2-like and GRIP domain-containing protein 5/6 isoform 1 [Homo sapiens]	333@C525
NP_004108.1|,NP_001139247.1|,NP_001139248.1|	442	3	7.87746	528	FKBP5	FK506 binding protein 5	6p21.31	TTC	1	1	1	|FKBP5|2289|Q13451;Q5TGM6|peptidyl-prolyl cis-trans isomerase FKBP5 isoform 1 [Homo sapiens]	333@C394	LQISMCQK
NP_004108.1|			7.87746		FKBP5	FK506 binding protein 5	6p21.31	TTC				|FKBP5|2289|Q13451;Q2TA84;Q5TGM6|peptidyl-prolyl cis-trans isomerase FKBP5 isoform 1 [Homo sapiens]	333@C394
NP_001139247.1|			7.87746		FKBP5	FK506 binding protein 5	6p21.31	TTC				|FKBP5|2289|Q13451;Q5TGM6|peptidyl-prolyl cis-trans isomerase FKBP5 isoform 1 [Homo sapiens]	333@C394
NP_001139248.1|			7.87746		FKBP5	FK506 binding protein 5	6p21.31	TTC				|FKBP5|2289|Q13451;Q5TGM6|peptidyl-prolyl cis-trans isomerase FKBP5 isoform 1 [Homo sapiens]	333@C394
NP_001157733.1|,NP_001157734.1|,NP_839944.1|,NP_001137355.1|,NP_001129261.1|,NP_001137504.1|,XP_003846538.1|,XP_003846552.1|,XP_003846565.1|	2	9	12.0413	537	Unmapped_XP_003846565.1|				1	1	1	|LOC100996754|100996754|-|PREDICTED: peptidyl-prolyl cis-trans isomerase A-like 4G-like [Homo sapiens]	333@C62,333@C83	IIPGFMCQGGDFTR
NP_001157733.1|			12.1951		PPIAL4D	peptidylprolyl isomerase A (cyclophilin A)-like 4D	1q21					|PPIAL4D|645142|F5H284|peptidylprolyl isomerase A (cyclophilin A)-like 4D [Homo sapiens]	333@C62
NP_001157734.1|			12.1951		Unmapped_NP_001157734.1|							|PPIAL4F|728945|F5H284|peptidylprolyl isomerase A (cyclophilin A)-like 4F [Homo sapiens]	333@C62
NP_839944.1|			12.1951		Unmapped_NP_839944.1|							|PPIAL4A|164022|Q9Y536|peptidylprolyl cis-trans isomerase A-like 4B [Homo sapiens]	333@C62
NP_001137355.1|			12.1951		PPIAL4B	peptidylprolyl isomerase A (cyclophilin A)-like 4B	1q21.1					|PPIAL4B|653505|Q9Y536|peptidyl-prolyl cis-trans isomerase A-like 4A/B/C [Homo sapiens]	333@C62
NP_001129261.1|			12.1951		Unmapped_NP_001129261.1|							|PPIAL4C|653598|Q9Y536|peptidyl-prolyl cis-trans isomerase A-like 4A/B/C [Homo sapiens]	333@C62
NP_001137504.1|			12.1951		Unmapped_NP_001137504.1|							|PPIAL4E|730262|F5H284|peptidylprolyl isomerase A (cyclophilin A)-like 4E [Homo sapiens]	333@C62
XP_003846538.1|			10.8108		Unmapped_XP_003846538.1|							|LOC100996725|100996725|-|PREDICTED: peptidyl-prolyl cis-trans isomerase A-like 4A/B/C-like [Homo sapiens]	333@C83
XP_003846552.1|			12.1951		Unmapped_XP_003846552.1|							|LOC100996744|100996744|-|PREDICTED: peptidyl-prolyl cis-trans isomerase A-like 4G-like [Homo sapiens]	333@C62
XP_003846565.1|			12.1951		Unmapped_XP_003846565.1|							|LOC100996754|100996754|-|PREDICTED: peptidyl-prolyl cis-trans isomerase A-like 4G-like [Homo sapiens]	333@C62
NP_001243728.1|	466	1	59.3857	560	GAPDH	glyceraldehyde-3-phosphate dehydrogenase	12p13.31		1	3	7	|GAPDH|2597|P04406;E7EUT4|glyceraldehyde-3-phosphate dehydrogenase isoform 2 [Homo sapiens]	333@C110,333@C114	IISNASCTTNCLAPLAK
NP_057417.3|	467	1	1.74419	561	SRRM2	serine/arginine repetitive matrix 2	16p13.3		1	1	1	|SRRM2|23524|Q9UQ35|serine/arginine repetitive matrix protein 2 [Homo sapiens]	333@C785	SLSGSSPCPK
NP_006420.1|,NP_001159757.1|	473	2	24.2275	569	CCT7	chaperonin containing TCP1, subunit 7 (eta)	2p13.2	CHAP	1	1	1	|CCT7|10574|Q99832|T-complex protein 1 subunit eta isoform d [Homo sapiens]	333@C158,333@C114	LLEKCAMTALSSK
NP_006420.1|			23.2044		CCT7	chaperonin containing TCP1, subunit 7 (eta)	2p13.2	CHAP				|CCT7|10574|Q99832|T-complex protein 1 subunit eta isoform a [Homo sapiens]	333@C158
NP_001159757.1|			25.2505		CCT7	chaperonin containing TCP1, subunit 7 (eta)	2p13.2	CHAP				|CCT7|10574|Q99832|T-complex protein 1 subunit eta isoform d [Homo sapiens]	333@C114
NP_000427.1|	480	1	9.42308	578	OXCT1	3-oxoacid CoA transferase 1	5p13		1	1	1	|OXCT1|5019|P55809|succinyl-CoA:3-ketoacid coenzyme A transferase 1, mitochondrial precursor [Homo sapiens]	333@C456	IMEKCTLPLTGK
NP_001449.3|,NP_001120959.1|	481	2	0.886132	579	FLNC	filamin C, gamma	7q32-q35		1	2	4	|FLNC|2318|Q14315;Q59H94|filamin-C isoform b [Homo sapiens]	333@C46	WCNEHLK
NP_001449.3|			0.880734		FLNC	filamin C, gamma	7q32-q35					|FLNC|2318|Q14315;Q59H94|filamin-C isoform a [Homo sapiens]	333@C46
NP_001120959.1|			0.89153		FLNC	filamin C, gamma	7q32-q35					|FLNC|2318|Q14315;Q59H94|filamin-C isoform b [Homo sapiens]	333@C46
NP_001448.2|,NP_001157789.1|,NP_001157790.1|,NP_001157791.1|	481	4	5.95961	580	FLNB	filamin B, beta	3p14.3		1	2	4	|FLNB|2317|O75369|filamin-B isoform 4 [Homo sapiens]	333@C26	WCNEHLK
NP_001448.2|			5.95696		FLNB	filamin B, beta	3p14.3					|FLNB|2317|O75369|filamin-B isoform 2 [Homo sapiens]	333@C26
NP_001157789.1|			5.88682		FLNB	filamin B, beta	3p14.3					|FLNB|2317|O75369|filamin-B isoform 1 [Homo sapiens]	333@C26
NP_001157790.1|			5.98225		FLNB	filamin B, beta	3p14.3					|FLNB|2317|O75369|filamin-B isoform 3 [Homo sapiens]	333@C26
NP_001157791.1|			6.01241		FLNB	filamin B, beta	3p14.3					|FLNB|2317|O75369|filamin-B isoform 4 [Homo sapiens]	333@C26
NP_689476.2|	505	1	20.3509	613	TPM3	tropomyosin 3	1q21.2	TPM	1	1	4	|TPM3|7170|P06753;Q8NAH0|tropomyosin alpha-3 chain isoform 1 [Homo sapiens]	333@C191	AELAESKCSELEEELKNVTNNLK
NP_001070908.1|,NP_055554.1|,NP_001070909.1|	508	3	2.14584	616	BCLAF1	BCL2-associated transcription factor 1	6q22-q23		1	1	1	|BCLAF1|9774|Q9NYF8|bcl-2-associated transcription factor 1 isoform 3 [Homo sapiens]	333@C686,333@C688,333@C515	LRCDSADLR
NP_001070908.1|			2.07135		BCLAF1	BCL2-associated transcription factor 1	6q22-q23					|BCLAF1|9774|Q9NYF8|bcl-2-associated transcription factor 1 isoform 2 [Homo sapiens]	333@C686
NP_055554.1|			1.95652		BCLAF1	BCL2-associated transcription factor 1	6q22-q23					|BCLAF1|9774|Q9NYF8|bcl-2-associated transcription factor 1 isoform 1 [Homo sapiens]	333@C688
NP_001070909.1|			2.40964		BCLAF1	BCL2-associated transcription factor 1	6q22-q23					|BCLAF1|9774|Q9NYF8|bcl-2-associated transcription factor 1 isoform 3 [Homo sapiens]	333@C515
NP_001138882.1|	511	1	30.3665	620	NONO	non-POU domain containing, octamer-binding	Xq13.1	RBM	1	2	4	|NONO|4841|Q15233;B7Z4C2;F5GYZ3|non-POU domain-containing octamer-binding protein isoform 2 [Homo sapiens]	333@C56	FACHSASLTVR
NP_659409.2|,NP_001137543.1|	512	2	6.0241	621	LDHAL6A	lactate dehydrogenase A-like 6A	11p15.1		1	1	2	|LDHAL6A|160287|Q6ZMR3|L-lactate dehydrogenase A-like 6A [Homo sapiens]	333@C163	VIGSGCNLDSAR
NP_659409.2|			6.0241		LDHAL6A	lactate dehydrogenase A-like 6A	11p15.1					|LDHAL6A|160287|Q6ZMR3|L-lactate dehydrogenase A-like 6A [Homo sapiens]	333@C163
NP_001137543.1|			6.0241		LDHAL6A	lactate dehydrogenase A-like 6A	11p15.1					|LDHAL6A|160287|Q6ZMR3|L-lactate dehydrogenase A-like 6A [Homo sapiens]	333@C163
NP_003671.1|	515	1	13.8258	625	YARS	tyrosyl-tRNA synthetase	1p35.1	aaRS1	1	1	1	|YARS|8565|P54577|tyrosine--tRNA ligase, cytoplasmic [Homo sapiens]	333@C519	LGSISCK
NP_005115.2|	521	1	2.16949	634	NUP153	nucleoporin 153kDa	6p22.3		1	1	2	|NUP153|9972|P49790|nuclear pore complex protein Nup153 [Homo sapiens]	333@C1065	SASVAPFTCK
DECOY_0_NP_054742.2|	523	1		636	Unmapped_DECOY_0_NP_054742.2|				1	1	1			QGVCVNIR
NP_003008.1|	528	1	28.0488	641	SRSF3	serine/arginine-rich splicing factor 3	6p21	RBM	1	1	2	|SRSF3|6428|P84103;B2R6F3|serine/arginine-rich splicing factor 3 [Homo sapiens]	333@C72	TLCGCR
NP_004125.3|	128	1	38.2916	649	HSPA9	heat shock 70kDa protein 9 (mortalin)	5q31.1	HSP70	1	2	2	|HSPA9|3313|P38646|stress-70 protein, mitochondrial precursor [Homo sapiens]	333@C366	TIAPCQK
NP_001243506.1|	544	1	15.7407	662	RPL10	ribosomal protein L10	Xq28	RPL	1	1	1	|RPL10|6134|P27635|60S ribosomal protein L10 isoform b [Homo sapiens]	333@C105	MLSCAGADR
NP_006004.2|,NP_001243509.1|	544	2	34.4744	663	RPL10	ribosomal protein L10	Xq28	RPL	1	1	1	|RPL10|6134|P27635|60S ribosomal protein L10 isoform c [Homo sapiens]	333@C105,333@C69	MLSCAGADR
NP_006004.2|			31.3084		RPL10	ribosomal protein L10	Xq28	RPL				|RPL10|6134|P27635|60S ribosomal protein L10 isoform a [Homo sapiens]	333@C105
NP_001243509.1|			37.6404		RPL10	ribosomal protein L10	Xq28	RPL				|RPL10|6134|P27635|60S ribosomal protein L10 isoform c [Homo sapiens]	333@C69
NP_001186708.1|	65	1	9.09091	675	PSMB2	proteasome (prosome, macropain) subunit, beta type, 2	1p34.2	PSM	1	2	3	|PSMB2|5690|B7Z478|proteasome subunit beta type-2 isoform 2 [Homo sapiens]	333@C138	KCLEELQK
NP_005331.1|	576	1	7.93651	706	HINT1	histidine triad nucleotide binding protein 1	5q31.2		1	1	1	|HINT1|3094|P49773|histidine triad nucleotide-binding protein 1 [Homo sapiens]	333@C84	KCAADLGLNK
NP_009191.1|	590	1	11.2554	722	LYPLA2	lysophospholipase II	1p36.11		1	1	1	|LYPLA2|11313|O95372|acyl-protein thioesterase 2 [Homo sapiens]	333@C213	TYPGVMHSSCPQEMAAVK
NP_000180.2|	609	1	3.16249	748	HK2	hexokinase 2	2p13		1	1	1	|HK2|3099|P52789|hexokinase-2 [Homo sapiens]	333@C794	FLSQIESDCLALLQVR
XP_934799.2|	463	1	5.97303	751	Unmapped_XP_934799.2|				1	2	4	|POTEJ|653781|P0CG39|PREDICTED: POTE ankyrin domain family member J [Homo sapiens]	333@C920,333@C935	CPEALFQPCFLGMESCGIHETTFNSIMK
XP_003846703.1|	463	1	20.4611	755	Unmapped_XP_003846703.1|				1	2	4	|LOC100996820|100996820|-|PREDICTED: POTE ankyrin domain family member I-like [Homo sapiens]	333@C229,333@C244	CPEALFQPCFLGMESCGIHETTFNSIMK
NP_001093241.1|	463	1	8.09302	757	POTEF	POTE ankyrin domain family, member F	2q21.1	ANKRD	1	2	4	|POTEF|728378|A5A3E0|POTE ankyrin domain family member F [Homo sapiens]	333@C957,333@C972	CPEALFQPCFLGMESCGIHETTFNSIMK
NP_001077007.1|	463	1	10.4186	758	POTEE	POTE ankyrin domain family, member E	2q21.1	ANKRD	1	2	4	|POTEE|445582|Q6S8J3|POTE ankyrin domain family member E [Homo sapiens]	333@C957,333@C972	CPEALFQPCFLGMESCGIHETTFNSIMK
NP_859048.1|,NP_859047.1|,NP_002565.1|,NP_001189360.1|	33	4	61.3065	764	PRDX1	peroxiredoxin 1	1p34.1		1	1	1	|PRDX1|5052|Q06830|peroxiredoxin-1 [Homo sapiens]	333@C173	HGEVCPAGWKPGSDTIKPDVQK
NP_859048.1|			61.3065		PRDX1	peroxiredoxin 1	1p34.1					|PRDX1|5052|Q06830|peroxiredoxin-1 [Homo sapiens]	333@C173
NP_859047.1|			61.3065		PRDX1	peroxiredoxin 1	1p34.1					|PRDX1|5052|Q06830|peroxiredoxin-1 [Homo sapiens]	333@C173
NP_002565.1|			61.3065		PRDX1	peroxiredoxin 1	1p34.1					|PRDX1|5052|Q06830|peroxiredoxin-1 [Homo sapiens]	333@C173
NP_001189360.1|			61.3065		PRDX1	peroxiredoxin 1	1p34.1					|PRDX1|5052|Q06830|peroxiredoxin-1 [Homo sapiens]	333@C173
NP_001003.1|	616	1	44.7115	768	RPS8	ribosomal protein S8	1p34.1-p32	RPS	1	1	1	|RPS8|6202|P62241;Q5JR94|40S ribosomal protein S8 [Homo sapiens]	333@C182	PGQCGR
NP_001896.2|	624	1	3.5533	778	CTPS1	CTP synthase 1	1p34.1		1	1	1	|CTPS1|1503|P17812|CTP synthase 1 [Homo sapiens]	333@C491	KCLEEQGLK
NP_031389.3|,NP_001138880.1|,NP_001138881.1|	511	3	29.2994	783	NONO	non-POU domain containing, octamer-binding	Xq13.1	RBM	1	2	4	|NONO|4841|Q15233|non-POU domain-containing octamer-binding protein isoform 1 [Homo sapiens]	333@C145	FACHSASLTVR
NP_031389.3|			29.2994		NONO	non-POU domain containing, octamer-binding	Xq13.1	RBM				|NONO|4841|Q15233|non-POU domain-containing octamer-binding protein isoform 1 [Homo sapiens]	333@C145
NP_001138880.1|			29.2994		NONO	non-POU domain containing, octamer-binding	Xq13.1	RBM				|NONO|4841|Q15233|non-POU domain-containing octamer-binding protein isoform 1 [Homo sapiens]	333@C145
NP_001138881.1|			29.2994		NONO	non-POU domain containing, octamer-binding	Xq13.1	RBM				|NONO|4841|Q15233|non-POU domain-containing octamer-binding protein isoform 1 [Homo sapiens]	333@C145
NP_067642.1|	642	1	6.76471	820	GNB4	guanine nucleotide binding protein (G protein), beta polypeptide 4	3q27.1	WDR	1	1	1	|GNB4|59345|Q9HAV0|guanine nucleotide-binding protein subunit beta-4 [Homo sapiens]	333@C148	ELPGHTGYLSCCR
NP_003312.3|	659	1	43.2967	827	TUFM	Tu translation elongation factor, mitochondrial	16p11.2		1	1	1	|TUFM|7284|P49411|elongation factor Tu, mitochondrial precursor [Homo sapiens]	333@C293	KGDECELLGHSK
NP_055117.1|,NP_001012474.1|	661	2	10.2941	830	SEC61G	Sec61 gamma subunit	7p11.2		1	1	2	|SEC61G|23480|P60059|protein transport protein Sec61 subunit gamma [Homo sapiens]	333@C25	RCTKPDR
NP_055117.1|			10.2941		SEC61G	Sec61 gamma subunit	7p11.2					|SEC61G|23480|P60059|protein transport protein Sec61 subunit gamma [Homo sapiens]	333@C25
NP_001012474.1|			10.2941		SEC61G	Sec61 gamma subunit	7p11.2					|SEC61G|23480|P60059|protein transport protein Sec61 subunit gamma [Homo sapiens]	333@C25
NP_733765.1|	669	1	5.08637	841	ATP2A2	ATPase, Ca++ transporting, cardiac muscle, slow twitch 2	12q24.11	PATP	1	2	4	|ATP2A2|488|P16615|sarcoplasmic/endoplasmic reticulum calcium ATPase 2 isoform b [Homo sapiens]	333@C997	NYLEPGKECVQPATK
NP_005380.2|,NP_001238978.1|,NP_001238979.1|,NP_001238981.1|,NP_001238982.1|,NP_001238980.1|	679	6	11.999	856	PCMT1	protein-L-isoaspartate (D-aspartate) O-methyltransferase	6q22.3-q24		1	2	3	|PCMT1|5110|B7Z972|protein-L-isoaspartate(D-aspartate) O-methyltransferase isoform 4 [Homo sapiens]	333@C160,333@C125	MVGCTGK
NP_005380.2|			11.2281		PCMT1	protein-L-isoaspartate (D-aspartate) O-methyltransferase	6q22.3-q24					|PCMT1|5110|-|protein-L-isoaspartate(D-aspartate) O-methyltransferase isoform 1 [Homo sapiens]	333@C160
NP_001238978.1|			11.1888		PCMT1	protein-L-isoaspartate (D-aspartate) O-methyltransferase	6q22.3-q24					|PCMT1|5110|P22061;H7BY58|protein-L-isoaspartate(D-aspartate) O-methyltransferase isoform 2 [Homo sapiens]	333@C160
NP_001238979.1|			12.8		PCMT1	protein-L-isoaspartate (D-aspartate) O-methyltransferase	6q22.3-q24					|PCMT1|5110|-|protein-L-isoaspartate(D-aspartate) O-methyltransferase isoform 3 [Homo sapiens]	333@C125
NP_001238981.1|			12.749		PCMT1	protein-L-isoaspartate (D-aspartate) O-methyltransferase	6q22.3-q24					|PCMT1|5110|-|protein-L-isoaspartate(D-aspartate) O-methyltransferase isoform 5 [Homo sapiens]	333@C125
NP_001238982.1|			11.2281		PCMT1	protein-L-isoaspartate (D-aspartate) O-methyltransferase	6q22.3-q24					|PCMT1|5110|P22061|protein-L-isoaspartate(D-aspartate) O-methyltransferase isoform 1 [Homo sapiens]	333@C160
NP_001238980.1|			12.8		PCMT1	protein-L-isoaspartate (D-aspartate) O-methyltransferase	6q22.3-q24					|PCMT1|5110|B7Z972|protein-L-isoaspartate(D-aspartate) O-methyltransferase isoform 4 [Homo sapiens]	333@C125
NP_001129064.1|,NP_002945.1|,NP_001170884.1|	684	3	55.7692	862	RPS27A	ribosomal protein S27a	2p16	RPS	1	2	3	|RPS27A|6233|P62979;B2RDW1|ubiquitin-40S ribosomal protein S27a precursor [Homo sapiens]	333@C149,333@C145	CCLTYCFNKPEDK
NP_001129064.1|			55.7692		RPS27A	ribosomal protein S27a	2p16	RPS				|RPS27A|6233|P62979;B2RDW1|ubiquitin-40S ribosomal protein S27a precursor [Homo sapiens]	333@C149,333@C145
NP_002945.1|			55.7692		RPS27A	ribosomal protein S27a	2p16	RPS				|RPS27A|6233|P62979;B2RDW1|ubiquitin-40S ribosomal protein S27a precursor [Homo sapiens]	333@C149,333@C145
NP_001170884.1|			55.7692		RPS27A	ribosomal protein S27a	2p16	RPS				|RPS27A|6233|P62979;B2RDW1|ubiquitin-40S ribosomal protein S27a precursor [Homo sapiens]	333@C149,333@C145
NP_002289.2|	224	1	32.2169	872	LCP1	lymphocyte cytosolic protein 1 (L-plastin)	13q14.3	EFHAND	1	2	2	|LCP1|3936|P13796|plastin-2 [Homo sapiens]	333@C460	KLENCNYAVELGK
NP_006635.2|	537	1	7.80886	896	HSPH1	heat shock 105kDa/110kDa protein 1	13q12.2-q13.3	HSP70	1	1	2	|HSPH1|10808|Q92598|heat shock protein 105 kDa [Homo sapiens]	333@C140	KPVTDCVISVPSFFTDAER
NP_004152.1|	701	1	31.2195	899	RAB1A	RAB1A, member RAS oncogene family	2p14	RAB	1	2	2	|RAB1A|5861|P62820;Q5U0I6|ras-related protein Rab-1A isoform 1 [Homo sapiens]	333@C126	LLVGNKCDLTTK
NP_002292.1|,NP_059144.1|	512	2	3.61446	901	LDHC	lactate dehydrogenase C	11p15.1		1	1	2	|LDHC|3948|P07864|L-lactate dehydrogenase C chain [Homo sapiens]	333@C163	VIGSGCNLDSAR
NP_002292.1|			3.61446		LDHC	lactate dehydrogenase C	11p15.1					|LDHC|3948|P07864|L-lactate dehydrogenase C chain [Homo sapiens]	333@C163
NP_059144.1|			3.61446		LDHC	lactate dehydrogenase C	11p15.1					|LDHC|3948|P07864|L-lactate dehydrogenase C chain [Homo sapiens]	333@C163
NP_058625.2|,NP_001242952.1|,NP_001107558.1|,NP_444507.1|	341	4	2.87074	904	CLIC6	chloride intracellular channel 6	21q22.12	CLIC	1	1	1	|CLIC6|54102|Q96NY7|chloride intracellular channel protein 6 [Homo sapiens]	333@C32,333@C191,333@C469	IGNCPFSQR
NP_058625.2|			3.58566		CLIC5	chloride intracellular channel 5	6p12.3	CLIC				|CLIC5|53405|Q9NZA1;Q53G01|chloride intracellular channel protein 5 isoform b [Homo sapiens]	333@C32
NP_001242952.1|			4.39024		CLIC5	chloride intracellular channel 5	6p12.3	CLIC				|CLIC5|53405|Q49AE1;Q8NBY3|chloride intracellular channel protein 5 isoform c [Homo sapiens]	333@C32
NP_001107558.1|			2.19512		CLIC5	chloride intracellular channel 5	6p12.3	CLIC				|CLIC5|53405|Q9NZA1;Q53G01|chloride intracellular channel protein 5 isoform a [Homo sapiens]	333@C191
NP_444507.1|			1.31195		CLIC6	chloride intracellular channel 6	21q22.12	CLIC				|CLIC6|54102|Q96NY7|chloride intracellular channel protein 6 [Homo sapiens]	333@C469
NP_039234.1|	341	1	10.6719	905	CLIC4	chloride intracellular channel 4	1p	CLIC	1	1	1	|CLIC4|25932|Q9Y696;Q6FIC5|chloride intracellular channel protein 4 [Homo sapiens]	333@C35	IGNCPFSQR
NP_001095867.1|,NP_001095869.1|	137	2	14.2457	921	HNRNPR	heterogeneous nuclear ribonucleoprotein R	1p36.12	RBM	1	1	1	|HNRNPR|10236|Q0VGD6;Q6MZS5|heterogeneous nuclear ribonucleoprotein R isoform 3 [Homo sapiens]	333@C125	LCDSYEIRPGK
NP_001095867.1|			14.2857		HNRNPR	heterogeneous nuclear ribonucleoprotein R	1p36.12	RBM				|HNRNPR|10236|O43390;Q0VGD6|heterogeneous nuclear ribonucleoprotein R isoform 4 [Homo sapiens]	333@C125
NP_001095869.1|			14.2056		HNRNPR	heterogeneous nuclear ribonucleoprotein R	1p36.12	RBM				|HNRNPR|10236|Q0VGD6;Q6MZS5|heterogeneous nuclear ribonucleoprotein R isoform 3 [Homo sapiens]	333@C125
NP_004850.1|	489	1	20.2985	931	CLTC	clathrin, heavy chain (Hc)	17q23.1		1	1	1	|CLTC|1213|Q00610|clathrin heavy chain 1 [Homo sapiens]	333@C870	IHEGCEEPATHNALAK
NP_065123.1|	722	1	33.9869	936	EIF5A2	eukaryotic translation initiation factor 5A2	3q26.2		1	1	1	|EIF5A2|56648|Q9GZV4|eukaryotic translation initiation factor 5A-2 [Homo sapiens]	333@C73	KYEDICPSTHNMDVPNIK
NP_001137232.1|,NP_001961.1|,NP_001137233.1|,NP_001137234.1|	722	4	46.7162	937	EIF5A	eukaryotic translation initiation factor 5A	17p13-p12		1	1	1	|EIF5A|1984|P63241|eukaryotic translation initiation factor 5A-1 isoform B [Homo sapiens]	333@C103,333@C73	KYEDICPSTHNMDVPNIK
NP_001137232.1|			40.7609		EIF5A	eukaryotic translation initiation factor 5A	17p13-p12					|EIF5A|1984|P63241|eukaryotic translation initiation factor 5A-1 isoform A [Homo sapiens]	333@C103
NP_001961.1|			48.7013		EIF5A	eukaryotic translation initiation factor 5A	17p13-p12					|EIF5A|1984|P63241|eukaryotic translation initiation factor 5A-1 isoform B [Homo sapiens]	333@C73
NP_001137233.1|			48.7013		EIF5A	eukaryotic translation initiation factor 5A	17p13-p12					|EIF5A|1984|P63241|eukaryotic translation initiation factor 5A-1 isoform B [Homo sapiens]	333@C73
NP_001137234.1|			48.7013		EIF5A	eukaryotic translation initiation factor 5A	17p13-p12					|EIF5A|1984|P63241|eukaryotic translation initiation factor 5A-1 isoform B [Homo sapiens]	333@C73
NP_001093162.1|	722	1	25.3247	938	EIF5AL1	eukaryotic translation initiation factor 5A-like 1	10q22.3		1	1	1	|EIF5AL1|143244|Q6IS14|eukaryotic translation initiation factor 5A-1-like [Homo sapiens]	333@C73	KYEDICPSTHNMDVPNIK
NP_542784.1|	544	1	22.8972	941	RPL10L	ribosomal protein L10-like	14q21.2	RPL	1	1	1	|RPL10L|140801|Q96L21|60S ribosomal protein L10-like [Homo sapiens]	333@C105	MLSCAGADR
NP_001435.1|	756	1	16.2963	992	FABP5	fatty acid binding protein 5 (psoriasis-associated)	8q21.13	FABP	1	1	1	|FABP5|2171|Q01469;E7DVW5|fatty acid-binding protein, epidermal [Homo sapiens]	333@C67	TTQFSCTLGEK
NP_775083.1|,NP_001035905.1|,NP_001177371.1|	757	3	4.37091	994	CAST	calpastatin	5q15		1	2	3	|CAST|831|P20810;Q59HE3;Q86YM9|calpastatin isoform m [Homo sapiens]	333@C386,333@C450,333@C395	AAAPAPVSEAVCR
NP_775083.1|			4.51895		CAST	calpastatin	5q15					|CAST|831|G5E946;Q86YM9|calpastatin isoform b [Homo sapiens]	333@C386
NP_001035905.1|			4.13333		CAST	calpastatin	5q15					|CAST|831|P20810;G5E9D3;Q86YM9|calpastatin isoform f [Homo sapiens]	333@C450
NP_001177371.1|			4.46043		CAST	calpastatin	5q15					|CAST|831|P20810;Q59HE3;Q86YM9|calpastatin isoform m [Homo sapiens]	333@C395
NP_006258.3|	437	1	1.11663	1003	RANBP2	RAN binding protein 2	2q13	TTC	1	1	1	|RANBP2|5903|P49792|E3 SUMO-protein ligase RanBP2 [Homo sapiens]	333@C524	QLCTERQK
NP_002037.2|	466	1	54.9254	1005	GAPDH	glyceraldehyde-3-phosphate dehydrogenase	12p13.31		1	3	7	|GAPDH|2597|P04406|glyceraldehyde-3-phosphate dehydrogenase isoform 1 [Homo sapiens]	333@C152,333@C156	IISNASCTTNCLAPLAK
NP_001014.1|,NP_001139699.1|	769	2	40.9309	1022	RPS20	ribosomal protein S20	8q12.1	RPS	1	2	4	|RPS20|6224|P60866|40S ribosomal protein S20 isoform 1 [Homo sapiens]	333@C70	KTPCGEGSK
NP_001014.1|			44.5378		RPS20	ribosomal protein S20	8q12.1	RPS				|RPS20|6224|P60866|40S ribosomal protein S20 isoform 2 [Homo sapiens]	333@C70
NP_001139699.1|			37.3239		RPS20	ribosomal protein S20	8q12.1	RPS				|RPS20|6224|P60866|40S ribosomal protein S20 isoform 1 [Homo sapiens]	333@C70
NP_997404.1|,NP_008939.1|	771	2	11.1728	1025	RTN4	reticulon 4	2p14-p13		1	2	6	|RTN4|57142|Q9NQC3;Q7L7Q5|reticulon-4 isoform C [Homo sapiens]	333@C895,333@C108	YSNSALGHVNCTIK
NP_997404.1|			3.75254		RTN4	reticulon 4	2p14-p13					|RTN4|57142|Q9NQC3;Q8IUA4|reticulon-4 isoform E [Homo sapiens]	333@C895
NP_008939.1|			18.593		RTN4	reticulon 4	2p14-p13					|RTN4|57142|Q9NQC3;Q7L7Q5|reticulon-4 isoform C [Homo sapiens]	333@C108
NP_001012.1|,NP_001185986.1|	784	2	30.3704	1044	Unmapped_NP_001185986.1|				1	1	2	|RPS17L|100505503|P0CW22;P08708|40S ribosomal protein S17-like [Homo sapiens]	333@C35	VCEEIAIIPSKK
NP_001012.1|			30.3704		RPS17	ribosomal protein S17	15q25.2	RPS				|RPS17|6218|P0CW22;P08708|40S ribosomal protein S17 [Homo sapiens]	333@C35
NP_001185986.1|			30.3704		Unmapped_NP_001185986.1|							|RPS17L|100505503|P0CW22;P08708|40S ribosomal protein S17-like [Homo sapiens]	333@C35
NP_005052.1|	790	1	5.65111	1052	RPL3L	ribosomal protein L3-like	16p13.3	RPL	1	2	3	|RPL3L|6123|Q92901|60S ribosomal protein L3-like [Homo sapiens]	333@C253	VACIGAWHPAR
NP_003964.3|,NP_001030168.1|	800	2	20.9302	1068	RPL14	ribosomal protein L14	3p22-p21.2	RPL	1	1	1	|RPL14|9045|P50914|60S ribosomal protein L14 [Homo sapiens]	333@C42	ALVDGPCTQVR
NP_003964.3|			20.9302		RPL14	ribosomal protein L14	3p22-p21.2	RPL				|RPL14|9045|P50914|60S ribosomal protein L14 [Homo sapiens]	333@C42
NP_001030168.1|			20.9302		RPL14	ribosomal protein L14	3p22-p21.2	RPL				|RPL14|9045|P50914|60S ribosomal protein L14 [Homo sapiens]	333@C42
NP_001036817.1|	505	1	25.9109	1078	TPM3	tropomyosin 3	1q21.2	TPM	1	2	5	|TPM3|7170|P06753|tropomyosin alpha-3 chain isoform 3 [Homo sapiens]	333@C170	LMDQNLKCLSAAEEK
NP_001036818.1|	505	1	29.1498	1080	TPM3	tropomyosin 3	1q21.2	TPM	1	1	4	|TPM3|7170|Q5VU72|tropomyosin alpha-3 chain isoform 5 [Homo sapiens]	333@C154	AELAESKCSELEEELKNVTNNLK
NP_001029025.1|	790	1	42.6554	1120	RPL3	ribosomal protein L3	22q13	RPL	1	2	3	|RPL3|6122|B3KS36;Q96QL0|60S ribosomal protein L3 isoform b [Homo sapiens]	333@C204	VACIGAWHPAR
NP_001244955.1|	379	1	83.8323	1126	TPI1	triosephosphate isomerase 1	12p13.31		1	2	3	|TPI1|7167|B7Z5D8|triosephosphate isomerase isoform 3 [Homo sapiens]	333@C136	IIYGGSVTGATCK
NP_001254635.1|	332	1	5.68182	1129	CD274	CD274 molecule	9p24.1	ENDOLIG	1	2	4	|CD274|29126|-|programmed cell death 1 ligand 1 isoform b precursor [Homo sapiens]	333@C158	KCGIQDTNSK
NP_001008800.1|	829	1	32.5444	1130	CCT3	chaperonin containing TCP1, subunit 3 (gamma)	1q23	CHAP	1	1	1	|CCT3|7203|P49368;B3KX11|T-complex protein 1 subunit gamma isoform c [Homo sapiens]	333@C417	TLIQNCGASTIR
NP_005989.3|	829	1	33.3945	1131	CCT3	chaperonin containing TCP1, subunit 3 (gamma)	1q23	CHAP	1	1	1	|CCT3|7203|P49368;B3KX11;Q59H77|T-complex protein 1 subunit gamma isoform a [Homo sapiens]	333@C455	TLIQNCGASTIR
NP_003397.1|,NP_663723.1|,NP_001129171.1|,NP_001129172.1|,NP_001129173.1|,NP_001129174.1|	19	6	65.3061	1137	YWHAZ	tyrosine 3-monooxygenase/tryptophan 5-monooxygenase activation protein, zeta	8q22.3		1	1	2	|YWHAZ|7534|P63104;D0PNI1|14-3-3 protein zeta/delta [Homo sapiens]	333@C25	YDDMAACMK
NP_003397.1|			65.3061		YWHAZ	tyrosine 3-monooxygenase/tryptophan 5-monooxygenase activation protein, zeta	8q22.3					|YWHAZ|7534|P63104;D0PNI1|14-3-3 protein zeta/delta [Homo sapiens]	333@C25
NP_663723.1|			65.3061		YWHAZ	tyrosine 3-monooxygenase/tryptophan 5-monooxygenase activation protein, zeta	8q22.3					|YWHAZ|7534|P63104;D0PNI1|14-3-3 protein zeta/delta [Homo sapiens]	333@C25
NP_001129171.1|			65.3061		YWHAZ	tyrosine 3-monooxygenase/tryptophan 5-monooxygenase activation protein, zeta	8q22.3					|YWHAZ|7534|P63104;D0PNI1|14-3-3 protein zeta/delta [Homo sapiens]	333@C25
NP_001129172.1|			65.3061		YWHAZ	tyrosine 3-monooxygenase/tryptophan 5-monooxygenase activation protein, zeta	8q22.3					|YWHAZ|7534|P63104;D0PNI1|14-3-3 protein zeta/delta [Homo sapiens]	333@C25
NP_001129173.1|			65.3061		YWHAZ	tyrosine 3-monooxygenase/tryptophan 5-monooxygenase activation protein, zeta	8q22.3					|YWHAZ|7534|P63104;D0PNI1|14-3-3 protein zeta/delta [Homo sapiens]	333@C25
NP_001129174.1|			65.3061		YWHAZ	tyrosine 3-monooxygenase/tryptophan 5-monooxygenase activation protein, zeta	8q22.3					|YWHAZ|7534|P63104;D0PNI1|14-3-3 protein zeta/delta [Homo sapiens]	333@C25
NP_001095.1|,NP_001245300.1|	150	2	5.09762	1140	Unmapped_NP_001245300.1|				1	1	4	|ACTN3|89|B4DZQ2|alpha-actinin-3 isoform 2 [Homo sapiens]	333@C346,333@C389	IQEKCQLEINFNTLQTK
NP_001095.1|			5.21643		Unmapped_NP_001095.1|							|ACTN3|89|Q08043;Q4VAM3|alpha-actinin-3 isoform 1 [Homo sapiens]	333@C346
NP_001245300.1|			4.97881		Unmapped_NP_001245300.1|							|ACTN3|89|B4DZQ2|alpha-actinin-3 isoform 2 [Homo sapiens]	333@C389
NP_004915.2|	150	1	18.8804	1141	ACTN4	actinin, alpha 4	19q13	EFHAND	1	1	1	|ACTN4|81|O43707|alpha-actinin-4 [Homo sapiens]	333@C351	VQEKCQLEINFNTLQTK
NP_001093.1|,NP_001123476.1|,NP_001123477.1|	150	3	20.7239	1142	ACTN1	actinin, alpha 1	14q24.1	EFHAND	1	1	1	|ACTN1|87|P12814|alpha-actinin-1 isoform c [Homo sapiens]	333@C332	VQEKCQLEINFNTLQTK
NP_001093.1|			20.852		ACTN1	actinin, alpha 1	14q24.1	EFHAND				|ACTN1|87|P12814|alpha-actinin-1 isoform b [Homo sapiens]	333@C332
NP_001123476.1|			20.3501		ACTN1	actinin, alpha 1	14q24.1	EFHAND				|ACTN1|87|P12814|alpha-actinin-1 isoform a [Homo sapiens]	333@C332
NP_001123477.1|			20.9696		ACTN1	actinin, alpha 1	14q24.1	EFHAND				|ACTN1|87|P12814|alpha-actinin-1 isoform c [Homo sapiens]	333@C332
NP_001094.1|	150	1	6.82327	1143	ACTN2	actinin, alpha 2	1q42-q43	EFHAND	1	1	1	|ACTN2|88|P35609|alpha-actinin-2 [Homo sapiens]	333@C339	VQEKCQLEINFNTLQTK
NP_000959.2|	834	1	39.5785	1147	RPL4	ribosomal protein L4	15q22	RPL	1	3	6	|RPL4|6124|P36578|60S ribosomal protein L4 [Homo sapiens]	333@C96	SGQGAFGNMCR
NP_004578.2|,NP_001036041.1|	838	2	1.3306	1151	RRBP1	ribosome binding protein 1	20p12		1	1	2	|RRBP1|6238|Q9P2E9|ribosome-binding protein 1 [Homo sapiens]	333@C459	ELCHTQSSHASLR
NP_004578.2|			1.3306		RRBP1	ribosome binding protein 1	20p12					|RRBP1|6238|Q9P2E9|ribosome-binding protein 1 [Homo sapiens]	333@C459
NP_001036041.1|			1.3306		RRBP1	ribosome binding protein 1	20p12					|RRBP1|6238|Q9P2E9|ribosome-binding protein 1 [Homo sapiens]	333@C459
NP_115571.1|,NP_620305.1|	844	2	0.677134	1158	Unmapped_NP_620305.1|				1	1	2	|SON|6651|P18583|protein SON isoform F [Homo sapiens]	333@C2070	ANAAAMCAK
NP_115571.1|			0.694746		Unmapped_NP_115571.1|							|SON|6651|P18583|protein SON isoform B [Homo sapiens]	333@C2070
NP_620305.1|			0.659522		Unmapped_NP_620305.1|							|SON|6651|P18583|protein SON isoform F [Homo sapiens]	333@C2070
NP_065393.1|,NP_997403.1|,NP_722550.1|	771	3	10.1182	1159	RTN4	reticulon 4	2p14-p13		1	2	6	|RTN4|57142|Q9NQC3;Q7L7Q6;Q8IUA4|reticulon-4 isoform B [Homo sapiens]	333@C1101,333@C301,333@C282	YSNSALGHVNCTIK
NP_065393.1|			4.19463		RTN4	reticulon 4	2p14-p13					|RTN4|57142|Q9NQC3;Q8IUA4|reticulon-4 isoform A [Homo sapiens]	333@C1101
NP_997403.1|			12.7551		RTN4	reticulon 4	2p14-p13					|RTN4|57142|Q9NQC3;Q8IUA4|reticulon-4 isoform D [Homo sapiens]	333@C301
NP_722550.1|			13.4048		RTN4	reticulon 4	2p14-p13					|RTN4|57142|Q9NQC3;Q7L7Q6;Q8IUA4|reticulon-4 isoform B [Homo sapiens]	333@C282
NP_002291.1|,NP_001167568.1|	512	2	50.2994	1160	LDHB	lactate dehydrogenase B	12p12.2-p12.1		1	1	2	|LDHB|3945|P07195;Q5U077|L-lactate dehydrogenase B chain [Homo sapiens]	333@C164	VIGSGCNLDSAR
NP_002291.1|			50.2994		LDHB	lactate dehydrogenase B	12p12.2-p12.1					|LDHB|3945|P07195;Q5U077|L-lactate dehydrogenase B chain [Homo sapiens]	333@C164
NP_001167568.1|			50.2994		LDHB	lactate dehydrogenase B	12p12.2-p12.1					|LDHB|3945|P07195;Q5U077|L-lactate dehydrogenase B chain [Homo sapiens]	333@C164
NP_000971.1|	847	1	54.5455	1163	RPL18A	ribosomal protein L18a	19p13.11	RPL	1	1	1	|RPL18A|6142|Q02543|60S ribosomal protein L18a [Homo sapiens]	333@C22	CHTPPLYR
NP_001247435.1|	850	1	45.9459	1166	RPS3	ribosomal protein S3	11q13.3-q13.5	RPS	1	1	2	|RPS3|6188|-|40S ribosomal protein S3 isoform 2 [Homo sapiens]	333@C150	GCEVVVSGK
NP_000996.2|,NP_001243731.1|	850	2	56.3786	1167	RPS3	ribosomal protein S3	11q13.3-q13.5	RPS	1	1	2	|RPS3|6188|P23396|40S ribosomal protein S3 isoform 1 [Homo sapiens]	333@C134	GCEVVVSGK
NP_000996.2|			56.3786		RPS3	ribosomal protein S3	11q13.3-q13.5	RPS				|RPS3|6188|P23396|40S ribosomal protein S3 isoform 1 [Homo sapiens]	333@C134
NP_001243731.1|			56.3786		RPS3	ribosomal protein S3	11q13.3-q13.5	RPS				|RPS3|6188|P23396|40S ribosomal protein S3 isoform 1 [Homo sapiens]	333@C134
NP_056315.1|,NP_950251.1|	851	2	8.04877	1168	C2CD2	C2 calcium-dependent domain containing 2	21q22.3		1	1	1	|C2CD2|25966|-|C2 domain-containing protein 2 isoform 2 [Homo sapiens]	333@C244,333@C89	EAQNLQCAASTAQESCPPKPPR
NP_056315.1|			7.04023		C2CD2	C2 calcium-dependent domain containing 2	21q22.3					|C2CD2|25966|Q9Y426|C2 domain-containing protein 2 isoform 1 precursor [Homo sapiens]	333@C244
NP_950251.1|			9.0573		C2CD2	C2 calcium-dependent domain containing 2	21q22.3					|C2CD2|25966|-|C2 domain-containing protein 2 isoform 2 [Homo sapiens]	333@C89
NP_003290.1|	359	1	33.9975	1169	HSP90B1	heat shock protein 90kDa beta (Grp94), member 1	12q24.2-q24.3	HSPC	1	1	2	|HSP90B1|7184|P14625|endoplasmin precursor [Homo sapiens]	333@C138	IKCDKEK
NP_001191439.1|	861	1	41.4986	1184	EIF4A1	eukaryotic translation initiation factor 4A1	17p13	DDX	1	1	1	|EIF4A1|1973|-|eukaryotic initiation factor 4A-I isoform 2 [Homo sapiens]	333@C66	AILPCIK
NP_001407.1|	861	1	42.8571	1185	EIF4A1	eukaryotic translation initiation factor 4A1	17p13	DDX	1	1	1	|EIF4A1|1973|P60842|eukaryotic initiation factor 4A-I isoform 1 [Homo sapiens]	333@C66	AILPCIK
NP_005013.1|	864	1	75	1190	PFN1	profilin 1	17p13.2		1	3	8	|PFN1|5216|P07737;Q53Y44|profilin-1 [Homo sapiens]	333@C128	KCYEMASHLR
NP_000261.2|	865	1	29.0657	1191	PNP	purine nucleoside phosphorylase	14q11.2		1	3	10	|PNP|4860|P00491|purine nucleoside phosphorylase [Homo sapiens]	333@C78	ACVMMQGR
NP_001186709.1|	65	1	9.52381	1192	PSMB2	proteasome (prosome, macropain) subunit, beta type, 2	1p34.2	PSM	1	2	3	|PSMB2|5690|-|proteasome subunit beta type-2 isoform 3 [Homo sapiens]	333@C46	KCLEELQK
NP_001240313.1|	866	1	34.4828	1193	RPL15	ribosomal protein L15	3p24.1	RPL	1	1	1	|RPL15|6138|Q642I1|60S ribosomal protein L15 isoform 2 [Homo sapiens]	333@C110	HCGALR
NP_002939.2|,NP_001240308.1|,NP_001240309.1|,NP_001240311.1|,NP_001240312.1|	866	5	46.0784	1194	RPL15	ribosomal protein L15	3p24.1	RPL	1	1	1	|RPL15|6138|P61313|60S ribosomal protein L15 isoform 1 [Homo sapiens]	333@C110	HCGALR
NP_002939.2|			46.0784		RPL15	ribosomal protein L15	3p24.1	RPL				|RPL15|6138|P61313|60S ribosomal protein L15 isoform 1 [Homo sapiens]	333@C110
NP_001240308.1|			46.0784		RPL15	ribosomal protein L15	3p24.1	RPL				|RPL15|6138|P61313|60S ribosomal protein L15 isoform 1 [Homo sapiens]	333@C110
NP_001240309.1|			46.0784		RPL15	ribosomal protein L15	3p24.1	RPL				|RPL15|6138|P61313|60S ribosomal protein L15 isoform 1 [Homo sapiens]	333@C110
NP_001240311.1|			46.0784		RPL15	ribosomal protein L15	3p24.1	RPL				|RPL15|6138|P61313|60S ribosomal protein L15 isoform 1 [Homo sapiens]	333@C110
NP_001240312.1|			46.0784		RPL15	ribosomal protein L15	3p24.1	RPL				|RPL15|6138|P61313|60S ribosomal protein L15 isoform 1 [Homo sapiens]	333@C110
NP_006089.1|	870	1	30.9148	1202	GNB2L1	guanine nucleotide binding protein (G protein), beta polypeptide 2-like 1	5q35.3	WDR	1	1	2	|GNB2L1|10399|P63244;E9KL35|guanine nucleotide-binding protein subunit beta-2-like 1 [Homo sapiens]	333@C207	TNHIGHTGYLNTVTVSPDGSLCASGGK
NP_001159756.1|	473	1	21.2719	1209	CCT7	chaperonin containing TCP1, subunit 7 (eta)	2p13.2	CHAP	1	1	1	|CCT7|10574|Q99832|T-complex protein 1 subunit eta isoform c [Homo sapiens]	333@C71	LLEKCAMTALSSK
NP_002296.1|	876	1	51.1111	1211	LGALS1	lectin, galactoside-binding, soluble, 1	22q13.1	ENDOLIG	1	2	5	|LGALS1|3956|P09382|galectin-1 [Homo sapiens]	333@C61	FNAHGDANTIVCNSK
NP_005372.2|	882	1	37.8873	1220	NCL	nucleolin	2q37.1	RBM	1	2	5	|NCL|4691|P19338;B3KM80|nucleolin [Homo sapiens]	333@C543	EALNSCNKR
NP_060697.4|	884	1	3.13688	1222	UBA6	ubiquitin-like modifier activating enzyme 6	4q13.2	UBE1	1	2	4	|UBA6|55236|A0AVT1|ubiquitin-like modifier-activating enzyme 6 [Homo sapiens]	333@C347	KPNVGCQQDSEELLK
NP_005780.2|,NP_001253974.1|	155	2	16.9633	1225	PSME3	proteasome (prosome, macropain) activator subunit 3 (PA28 gamma; Ki)	17q12-q21	PSM	1	1	2	|PSME3|10197|-|proteasome activator complex subunit 3 isoform 3 [Homo sapiens]	333@C133,333@C144	LLIEKCNTVK
NP_005780.2|			17.3228		PSME3	proteasome (prosome, macropain) activator subunit 3 (PA28 gamma; Ki)	17q12-q21	PSM				|PSME3|10197|P61289|proteasome activator complex subunit 3 isoform 1 [Homo sapiens]	333@C133
NP_001253974.1|			16.6038		PSME3	proteasome (prosome, macropain) activator subunit 3 (PA28 gamma; Ki)	17q12-q21	PSM				|PSME3|10197|-|proteasome activator complex subunit 3 isoform 3 [Homo sapiens]	333@C144
NP_001019.1|	888	1	40.8	1228	RPS25	ribosomal protein S25	11q23.3	RPS	1	2	7	|RPS25|6230|P62851|40S ribosomal protein S25 [Homo sapiens]	333@C59	ATYDKLCK
NP_001247436.1|	850	1	48.7179	1229	RPS3	ribosomal protein S3	11q13.3-q13.5	RPS	1	1	2	|RPS3|6188|P23396|40S ribosomal protein S3 isoform 3 [Homo sapiens]	333@C8	GCEVVVSGK
NP_060439.2|	889	1	1.4652	1231	IWS1	IWS1 homolog (S. cerevisiae)	2q14.3		1	1	2	|IWS1|55677|Q96ST2|protein IWS1 homolog [Homo sapiens]	333@C749	ALRPGDPGFCAR
NP_003900.1|	892	1	8.56611	1235	CPNE3	copine III	8q21		1	1	2	|CPNE3|8895|O75131;Q05DL8|copine-3 [Homo sapiens]	333@C54	IKNCLNPQFSK
NP_001193727.1|	320	1	54.6512	1238	PKM	pyruvate kinase, muscle	15q23		1	1	2	|PKM|5315|P14618|pyruvate kinase isozymes M1/M2 isoform e [Homo sapiens]	333@C459	GIFPVLCK
NP_006176.2|	894	1	1.18203	1242	NUMA1	nuclear mitotic apparatus protein 1	11q13		1	1	1	|NUMA1|4926|Q14980;Q3SYK8;Q4LE64|nuclear mitotic apparatus protein 1 [Homo sapiens]	333@C658	KVEELQACVETAR
NP_060658.3|,NP_001164006.1|,NP_001164007.1|	193	3	4.55534	1245	ATAD3A	ATPase family, AAA domain containing 3A	1p36.33	AATP	1	1	1	|ATAD3A|55210|Q9NVI7;B3KPB3;G3V1I6|ATPase family AAA domain-containing protein 3A isoform 3 [Homo sapiens]	333@C563,333@C515,333@C436	KCSEVAR
NP_060658.3|			4.10095		ATAD3A	ATPase family, AAA domain containing 3A	1p36.33	AATP				|ATAD3A|55210|Q9NVI7|ATPase family AAA domain-containing protein 3A isoform 1 [Homo sapiens]	333@C563
NP_001164006.1|			4.43686		ATAD3A	ATPase family, AAA domain containing 3A	1p36.33	AATP				|ATAD3A|55210|Q9NVI7;D2K8Q1|ATPase family AAA domain-containing protein 3A isoform 2 [Homo sapiens]	333@C515
NP_001164007.1|			5.12821		ATAD3A	ATPase family, AAA domain containing 3A	1p36.33	AATP				|ATAD3A|55210|Q9NVI7;B3KPB3;G3V1I6|ATPase family AAA domain-containing protein 3A isoform 3 [Homo sapiens]	333@C436
NP_114127.3|	193	1	2.16049	1246	ATAD3B	ATPase family, AAA domain containing 3B	1p36.33	AATP	1	1	1	|ATAD3B|83858|Q5T9A4|ATPase family AAA domain-containing protein 3B [Homo sapiens]	333@C515	KCSEVAR
NP_003282.2|	898	1	2.64211	1250	TPP2	tripeptidyl peptidase II	13q32-q33		1	1	2	|TPP2|7174|P29144|tripeptidyl-peptidase 2 [Homo sapiens]	333@C28	KETGAASFLCR
XP_001718975.3|,XP_372741.4|	2	2	20.7834	1253	Unmapped_XP_372741.4|				1	1	1	|LOC390956|390956|-|PREDICTED: peptidyl-prolyl cis-trans isomerase A-like [Homo sapiens]	333@C108,333@C84	IIPGFMCQGGDFTR
XP_001718975.3|			19.5238		Unmapped_XP_001718975.3|							|LOC390956|390956|-|PREDICTED: peptidyl-prolyl cis-trans isomerase A-like [Homo sapiens]	333@C108
XP_372741.4|			22.043		Unmapped_XP_372741.4|							|LOC390956|390956|-|PREDICTED: peptidyl-prolyl cis-trans isomerase A-like [Homo sapiens]	333@C84
NP_942127.1|,NP_001087.2|	903	2	6.84321	1259	ACLY	ATP citrate lyase	17q21.2		1	1	2	|ACLY|47|P53396|ATP-citrate synthase isoform 1 [Homo sapiens]	333@C20	FICTTSAIQNR
NP_942127.1|			6.87443		ACLY	ATP citrate lyase	17q21.2					|ACLY|47|P53396|ATP-citrate synthase isoform 2 [Homo sapiens]	333@C20
NP_001087.2|			6.81199		ACLY	ATP citrate lyase	17q21.2					|ACLY|47|P53396|ATP-citrate synthase isoform 1 [Homo sapiens]	333@C20
NP_078934.3|	905	1	0.925069	1264	IPO4	importin 4	14q11.2	IPO	1	1	1	|IPO4|79711|Q8TEX9;B3KT38|importin-4 [Homo sapiens]	333@C708	LLECPHLNVR
NP_002464.1|	94	1	21.0714	1267	MYH9	myosin, heavy chain 9, non-muscle	22q13.1	MYHII	1	1	2	|MYH9|4627|P35579;Q60FE2|myosin-9 [Homo sapiens]	333@C988	KLEEEQIILEDQNCK
NP_060708.1|	908	1	3.08057	1268	AGK	acylglycerol kinase	7q34		1	1	2	|AGK|55750|Q53H12;A4D1U5|acylglycerol kinase, mitochondrial precursor [Homo sapiens]	333@C72	ATVFLNPAACK
NP_001128711.1|	512	1	45.6204	1270	LDHA	lactate dehydrogenase A	11p15.1		1	1	2	|LDHA|3939|P00338|L-lactate dehydrogenase A chain isoform 2 [Homo sapiens]	333@C105	VIGSGCNLDSAR
NP_001184110.1|	330	1	26.1905	1296	TUBB3	tubulin, beta 3 class III	16q24.3	TUB	1	1	2	|TUBB3|10381|Q13509;A8K854|tubulin beta-3 chain isoform 2 [Homo sapiens]	333@C231	NMMAACDPR
NP_001185771.1|,NP_006422.1|	927	2	22.1386	1305	CCT2	chaperonin containing TCP1, subunit 2 (beta)	12q14	CHAP	1	2	7	|CCT2|10576|P78371|T-complex protein 1 subunit beta isoform 1 [Homo sapiens]	333@C348,333@C395	SLHDALCVLAQTVK
NP_001185771.1|			23.1557		CCT2	chaperonin containing TCP1, subunit 2 (beta)	12q14	CHAP				|CCT2|10576|P78371|T-complex protein 1 subunit beta isoform 2 [Homo sapiens]	333@C348
NP_006422.1|			21.1215		CCT2	chaperonin containing TCP1, subunit 2 (beta)	12q14	CHAP				|CCT2|10576|P78371|T-complex protein 1 subunit beta isoform 1 [Homo sapiens]	333@C395
NP_002366.2|,NP_001127836.1|	929	2	8.30829	1308	MAP4	microtubule-associated protein 4	3p21		1	1	2	|MAP4|4134|P27816|microtubule-associated protein 4 isoform 4 [Homo sapiens]	333@C535	NVCLPPEMEVALTEDQVPALK
NP_002366.2|			8.24653		MAP4	microtubule-associated protein 4	3p21					|MAP4|4134|P27816|microtubule-associated protein 4 isoform 1 [Homo sapiens]	333@C535
NP_001127836.1|			8.37004		MAP4	microtubule-associated protein 4	3p21					|MAP4|4134|P27816|microtubule-associated protein 4 isoform 4 [Homo sapiens]	333@C535
